# Supplementary material
Source: publisher figshare collection journal article supplement (https://gsajournals.figshare.com/articles/dataset/_/9820622)
Supplement: Supplementary file 1 [file 2]

| Table S1: binding sites in MED promoters |                     |        |       | SKN-1    | SKN-1core |
|------------------------------------------|---------------------|--------|-------|----------|-----------|
| #                                        | Name                | Length | %AT   | WWTRTCAT | RTCAT     |
| 1                                        | japonica_MED1       | 600bp  | 66.67 | 2        | 7         |
| 2                                        | afra_MED1.3         | 600bp  | 48.33 | 3**      | 11**      |
| 3                                        | sulstoni_MED1.1     | 600bp  | 53.50 | 3**      | 7*        |
| 4                                        | waitukubuli_MED1.1  | 600bp  | 55.50 | 4**      | 11**      |
| 5                                        | panamensis_MED1.1   | 600bp  | 57.50 | 0        | 6*        |
| 6                                        | nouraguensis_MED1.1 | 600bp  | 57.83 | 2*       | 8*        |
| 7                                        | becei_MED1.2        | 600bp  | 58.67 | 3**      | 5         |
| 8                                        | kamaaina_MED1.1     | 600bp  | 54.17 | 3**      | 5         |
| 9                                        | inopinata_MED1.1    | 600bp  | 63.67 | 4**      | 11**      |
| 10                                       | elegans_MED1        | 600bp  | 64.67 | 1        | 8*        |
| 11                                       | doughertyi_MED1.1   | 600bp  | 63.17 | 6**      | 13**      |
| 12                                       | tropicalis_MED1.1   | 600bp  | 65.17 | 3*       | 10**      |
| 13                                       | brenneri_MED1.20    | 600bp  | 61.67 | 3*       | 9**       |
| 14                                       | remanei_MED1        | 600bp  | 58.00 | 4**      | 11**      |
| 15                                       | latens_MED1.1       | 600bp  | 58.83 | 4**      | 10**      |
| 16                                       | nigoni_MED1.3       | 600bp  | 63.33 | 4**      | 9*        |
| 17                                       | briggsae_MED1.3     | 600bp  | 62.50 | 3*       | 6         |
| 18                                       | sinica_MED1.1       | 600bp  | 64.00 | 3*       | 9**       |
| 19                                       | zanzibari_MED1.1    | 600bp  | 66.50 | 3*       | 5         |
| 20                                       | tribulationis_MED   | 600bp  | 60.67 | 3**      | 7         |

\*  $0.01 \leq p \leq 0.05$

\*\*  $p < 0.01$
