# Supplementary material
Source: publisher figshare collection journal article supplement (https://gsajournals.figshare.com/articles/dataset/_/9820622)
Supplement: Supplementary file 1 [file 2]

## Sheet: species searched
Species with MED and END orthologues
species	strain	data source
C. elegans	N2/VC1010	WormBase
C. remanei	PX439	Caenorhabditis Genomes Project (CGP) server
C. sp. 9/nigoni	JU1422	WormBase
C. briggsae	CB4	CGP server
C. sp. 26/zanzibari	JU2190	CGP server
C. sp. 5/sinica	JU800	CGP server
C. sp. 40/tribulationis	JU2818	CGP server
C. sp. 23/latens	PX534	CGP server
C. sp. 34/inopinata	NK74SC	CGP server
C. brenneri	PB2801	WormBase
C. sp. 10/doughertyi	JU1771	CGP server
C. sp. 11/tropicalis	JU1373	CGP server
C. japonica	DF5081	CGP server
C. sp. 15/kamaaina	QG2077	CGP server
C. sp. 17/nouraguensis	JU2079	CGP server
C. sp 29/becei	QG2083	CGP server
C. sp 28/panamensis	QG2080	CGP server
C. sp 39/waitukubuli	NIC564	CGP server
C. sp. 7/afra	JU1286	CGP server
C. sp. 32/sulstoni	JU2788	CGP server
Species with no MED or END orthologues
species	strain	data source
C. monodelphis sp.	JU1667	CGP server
C. sp. 21/parvicauda	NIC534	CGP server
C. plicata	SB355	CGP server
C. virilis	JU1968	CGP server
C. sp. 38/quiockensis	JU2809	CGP server
C. castelli	JU1956	CGP server
C. angaria	PS1010	WormBase
C. sp. 31/uteleia	JU2585	CGP server

## Sheet: Genes
species	name	status*	sequence scaffold or contig	coding DNA sequence (CDS) coordinates	overlapping CDS (if any)/nature of overlap	coding DNA sequence	protein sequence	length (aa)	notes
elegans	MED-1		LG X	(1..522) (relative to ATG)	T24D3.1/med-1	atggcctacccttaccccgttttcaatgctgaaaatgtctttgacaatacccagcaacaagttggattctatgattattcaactccattcaatggtacatactcctttactactgactattcttattataataactactatgactatgtcaatacttatgcttcttattatccaactgcaatggattcttcatctttaaatatttcatcaactactggaagtcctaattcttcacatttcaccacgtttactcatttttccactccatctacatctccatctacctctactcaaagttcaactacaccgagcaattctgataataagaagtcatttcaatgctcaaattgttcagtaactgaaacaattcgttggaggaatattcgatcaaaggaagga…	maypypvfnaenvfdntqqqvgfydystpfngtysfttdysyynnyydyvntyasyyptamdssslnissttgspnsshfttfthfstpstspststqssttpsnsdnkksfqcsncsvtetirwrnirskegiqcnacfiyqrkynktrpvtavnkyqkrklkvqetngvdsf	174
elegans	MED-2		LG III	(1..522) (relative to ATG)	K04C2.5/med-2	atggcttatccgtacccagttttcaatgctgaaaatgtctttgacaatacccagcaacaagttggattctatgattattcaactccattcaatggtacatactccttcactactgactattcttattataataactactatgactatgtcaatacttatgcttcttattatccaactgcaatggattcttcatctttaaatatttcaccaactactggaagtcctaattcttcccatttcaccacgtttactcatttttctactccatctacatctccatctacctctactcaaagttcaactccaccgagcaattctgataataagaagtcatttcaatgctcaaattgttcagtaactgaaacaattcgttggaggaatattcgatcaaaggaagga…	maypypvfnaenvfdntqqqvgfydystpfngtysfttdysyynnyydyvntyasyyptamdssslnispttgspnsshfttfthfstpstspststqsstppsnsdnkksfqcsncsvtetirwrnirskegiqcnacfiyqrkynetrpvtavnkyqkrklkvqetngvdss	174
elegans	END-1		LG V	(1..211,801..973,1022..1122,1684..1864) (relative to ATG)	F58E10.2/end-1	atgtatcaatcgtcttcttcatctccatctccccatcttccatatacctatggagtcattgacaaggatggaaatgttcattcccatgaaatgcattttccggataatcatggaaatccttcgccactcgatgctacacaaatgtaccaacaggctccagttcaatatggtggtggagatcaatattttgatgattttgggcaatactttgttcaatcgtacgatccagcacaacaatcgacaccagtgcatccaatgtttggaagtctcgatatgatgaattgctactcacaacagtatccccaaattggacaagactatcaacaacaggaaatcgaaaatattccaccagtctctacaaatcgcaaaattgtgaacaaaaagccctcaacgttccac…	myqssssspsphlpytygvidkdgnvhshemhfpdnhgnpspldatqmyqqapvqygggdqyfddfgqyfvqsydpaqqstpvhpmfgsldmmncysqqypqigqdyqqqeienippvstnrkivnkkpstfhtnsvcsnpncrtrettlwrrtdsgaiecngcslyfrkngiqrpaelcrktimkrnrrpraevqsptpedsklchnttplqnipsqhfs	221
elegans	END-3		LG V	(1..256,312..401,449..704,1024..1150) (relative to ATG)	F58E10.5/end-3	atgtactcgaactcattctcttcatcatcttcatcttccaactcaccaatgtcttttgattttggattccctcagtttcccgaacaagtccaattcaatgaagaaggctacgggacaccatctccagatgtcctccagaatatgaattatcatcattatccggcacaagatatgacgacaaattcatacaatggaggctatgacaattcaatgcaacagaattttatgcaaccagataatggtgcaggatactacaatgaaaactatcaacagatgcctgattttcaatttccagttcaaaattttgattttacaaatcaatttgaattcacgacgcctattaatgacctccagcaatctcaaacttccatcaaccacaccaatcccgacaacaatgaa…	mysnsfsssssssnspmsfdfgfpqfpeqvqfneegygtpspdvlqnmnyhhypaqdmttnsynggydnsmqqnfmqpdngagyynenyqqmpdfqfpvqnfdftnqfefttpindlqqsqtsinhtnpdnnensmpeipidggfnffpaqevqewkparkasknkikkistmhinsscsncgcretklwrrneqgetecnpcnlyervkghkrpqhlwnkpaakrrrrpvaplvdsnafnf	242
remanei	MED-1.1		CREMA.Contig204	complement(76799..77371)	CREMA.FL82_23865-RA/partial (theirs much longer)	atggatccattttcttatcctctcccaacatttgatgttgattattcctccacccctacctactctggctactaccctaacactgattactggaactgggtcaattattactatcaacatggattcacttatgatcagccgacgtcttctgaatattcattcatgacttcaccgtcaacttctgcgatgtcaactccaagtacctccgtaggttctgatccaacactcctctcaatgacgcctccaatgccaacttctacttttgcaacaccaaatacttcatctgctttttcttcaactgcaactccgtcctcaatgctttcgatgacatctccattctatcctatgtcatctgtaacatcgtccaccactccccatcgtcctcagggttctcccaaa…	mdpfsyplptfdvdysstptysgyypntdywnwvnyyyqhgftydqptsseysfmtspstsamstpstsvgsdptllsmtppmptstfatpntssafsstatpssmlsmtspfypmssvtssttphrpqgspkqcsncfatetcqwrnvrsengvlcnacfiyqrkykktrpvtamekywskkahrqsnsd	191
remanei	MED-1.2		CREMA.Contig204	(73946..74521)		atggaccctttctcttaccctctcccaatatttgatgttgattctacctccacctattctggctactaccctagcactgactactggaactgggtcaactactactatcaaaatggattcacttatgatcagccgacgtcttctggatattcattcatgacttcaccgtcaacttctacgatgtcaacctcttcagcatctgatccaacattcctttcaatgacgcctcggatgccaacttctacttttgcaacaccgagtacttcatcaacatcatcttcaactgccaccccgtacccaatgctctcaatgacacctccattctgtcctatggcaccaacttcggcaatgacgccggcaaccaccgccaccactccccatcgtccccaggatgctccc…	mdpfsyplpifdvdststysgyypstdywnwvnyyyqngftydqptssgysfmtspststmstssasdptflsmtprmptstfatpstsstssstatpypmlsmtppfcpmaptsamtpattattphrpqdapkqcsncfatetcqwrnvrsengilcnacfiyqrkykktrpvtamekyrskkaqrqsnsd	192
remanei	MED-1.3		CREMA.Contig60	(172485..172991)	Cr-med-4; not identified	atggaccctntctcttatcctttcccaacatataatgttgattattcctctacccctacntattcnggntactaccctaatacggattactggaactgggtcaactattactatcaaaatggattcacatatgatcagccgacgtcttctggatattcatttatgacttcaccaccaacttctacgatgtcaactccaagtacgtcctcagaacctgattcaactgccacttcatctccaatgctctcaatgacgccttcattctatccgataccaacttctacaatggcaccaaccaccaccactccccatcgttcccagggttttcctaaacaatgctccaactgcttcgccacggaaacatgtcaatggaggaatgttcgatcggagaacggaatt…	mdpxsypfptynvdysstptysgyypntdywnwvnyyyqngftydqptssgysfmtspptstmstpstssepdstatsspmlsmtpsfypiptstmapttttphrsqgfpkqcsncfatetcqwrnvrsengilcnacfiylrkykktrpvtavekyrskkvhrqsnsd	169
remanei	MED-1.4		CREMA.Contig60	(173794..174348)	Cr-med-5; CREMA.FL82_18305-RA/partial (theirs much longer upstream)	atggaccctttcccaacattcaatattgattattcctctgaccctacctattctgggtattaccttaacagcgactactggaactggggcaactattactatcaaaatggattaacctatgatcagccgacgtcttctggatattcattcacgccttcaacttctaccatgtcaactccaagtacatcctcagaatctgattcaactgctatttcatctccaattctctcaatgacgccttcattctatccgatgccaactgcaacatcagccataacatcttattccaatgcttcttcattgctcacaatgacaccaccaaccaccaccactcctcatcgttcccagggttcttctaaacaatgttccaactgcttcgccacggaaacatgtcaatgg…	mdpfptfnidyssdptysgyylnsdywnwgnyyyqngltydqptssgysftpststmstpstssesdstaisspilsmtpsfypmptatsaitsysnasslltmtppttttphrsqgsskqcsncfatetcqwrnvrsengilcnacfiyqrkykktrpatamekyrskkahqqskkahrqsnsd	185
remanei	MED-1.5		CREMA.Contig60	(162168..162734)	CREMA.FL82_18302-RA/partial (theirs much longer)	atggaccctttctcttatcctctcccaacttttgattattcctctgaccctacctattctggctactaccctaatacggactactggaactgggtcaactattactatcaaaatggattcacatatgatcagtcgacgtcttctggatattcattcacgccatcaatttctacgatgtcaactccaagtacctcctcagaatctgattcaactgctatttcatctccaatgctctcaatgacgccttcattctatccgatgccaactgcaacatcagccataatatctgattccaatgctgctccattgctcacaatgacaccaccaaccaccaccaccactcctcatcgttcccagggttctcctaaccaatgctccaactgtttttccacggaaaca…	mdpfsyplptfdyssdptysgyypntdywnwvnyyyqngftydqstssgysftpsistmstpstssesdstaisspmlsmtpsfypmptatsaiisdsnaaplltmtpptttttphrsqgspnqcsncfstetcqwrnvrsengilcnpcfiyqrkykktrpvtamekyrykkvhkqrskkvhrqsnsd	189
remanei	MED-1.6		CREMA.Contig60	complement(153010..153564)	CREMA.FL82_18299-RA/partial (theirs much longer)	atggaccctctctcttatcctttcccaacatataatgttgattattcctctacccctacntattcnggntactaccctaatacggattactggaactgggtcaactattactatcaaaatggattcacatatgatcagccgacgtcttctggatattcattnangacttcaccancaanttctacnatgtcaactccaagtacgtcctcagaacctgatccaactgccacttcatctccaatgctctcaatgacgcctacattctatccgatgccaactgcaacatcagccataacatctgattcccatgctgctccattgctcacaatgacaccaccaaccaccaccaccactcctcatcgttcccagggttctcccaaacaatgctccaactgcttc…	mdplsypfptynvdysstptysgyypntdywnwvnyyyqngftydqptssgysxxtspxxstmstpstssepdptatsspmlsmtptfypmptatsaitsdshaaplltmtpptttttphrsqgspkqcsncfatetcqwrnvrsengilcnacfiyrrkykktrpvsamekyrykkshqqcnsd	185
remanei	MED-1.7		CREMA.Contig112	complement(193310..193888)	CREMA.FL82_21224-RA/partial (theirs missing amino half)	atgtatcaaaatacaattttacacgacctgaataacccccataactcttcgttctctaactctattcgtttcagaatttgttcaatcatcatgaataaccaagcgctgcaacaacaaaatgaaaatgtcacgacccccttgagtccggaatttctgaacgggttcattcgtggagcagagatgatgaggaattatctgcagacggtatcgtccctgatgcctccacagcttcatgaggctccattagtcccaacgacaggattaccgtattctatgtcatctacaacttctcaagctccgcccaattcttctgctgatcaatcgaaaatcaccctatcaatcgataatcgggatgagaaaaaattgttgtcaagcccaaaggaaatggactccagctcc…	myqntilhdlnnphnssfsnsirfricsiimnnqalqqqnenvttplspeflngfirgaemmrnylqtvsslmppqlheaplvpttglpysmssttsqappnssadqskitlsidnrdekkllsspkemdsssprttklkscshckvtesccwrkvrsdtgmmcnacfiyerkykksrplsaikkhnamtehn	193
remanei	MED-1.8		CREMA.Contig474	(1158..1661)		atgaataaaaaatcaccgcaacaaaatgaaagtgacacccattctttgagtccgcagtatctgatcgggttcatatacggagctgagataatgaagaagcacatggaaattatgtcgtcgcctccacagcttccggcttcattagtcccgacggcaggattctcgtattctatggaatcaacagattctcagtcaccgcccaacagtgttgatttattcaccaacagcttgaattcttctgctgatcaatcgaaaagtaccgataatttggaacatatacaattgtcgtctagccccagagaatgttcgatgggctccagcgcccctcgaacaacaaaactgaagtcgtgctcccactgcgaaatcaaccaatcctgttgttggagaaaagttcgatcg…	mnkkspqqnesdthslspqyligfiygaeimkkhmeimssppqlpaslvptagfsysmestdsqsppnsvdlftnslnssadqskstdnlehiqlsssprecsmgssaprttklkscshceinqsccwrkvrsetgmmcnacfvyerkykksrplsaikkhnkmnefn	168
remanei	MED-1.9		CREMA.Contig86	complement(324662..325147)	CREMA.FL82_19935-RA/exact; close to CrMED1.1, very similar to Cr-med-7	atggacccactatcttacccactctcaacattcaatgttgactattccgctacacattactattctggctattaccctaacacatactactggaattggtccaactactactatcaaaatgaattcaactatgatcagccgacgtcctctggatattcgttcacaacaacttcattgatgacaatttcaagtacctcatcaggatcttattccactgctacaccactattctcacattcaatgacgccttcaatgccaacaatgacgccaccaaccaccaccactcctcatcgtcataaggattcaactagacactgctccaactgtttcgccacagaaacatgtcaatggaagaatgttagatcggagaatggaattctatgcaatgcttgtttcatt…	mdplsyplstfnvdysathyysgyypntyywnwsnyyyqnefnydqptssgysftttslmtisstssgsystatplfshsmtpsmptmtppttttphrhkdstrhcsncfatetcqwknvrsengilcnacfiyqrkykktrpvtamekynskkavrqsnsn	162
remanei	MED-1.10	pseudogene	CREMA.Contig86	complement (327715..327813)		caatgttccaactgtttcgccacagaaacatgtcaatggaggaatgttagatcggagaatgaaattctatgcaatgcttgtttcatttacgaaagaaaa	qcsncfatetcqwrnvrseneilcnacfiyerk	33	partial ORF, first part of zf
remanei	END-1		CREMA.Contig6	(2580325..2580559,2580601..2580794,2580951..2581051,2581104..2581287)	Cre-END-1/CRE05455	atgtatccaatatcatcgtcatcctcttcttcaacgtcttcccctccatctaacactcataatacttcatatgcatatggaattgtggacaaagatggaaatattcattctcatgaaatgcatttttcacatgatcacggaaatccatctccagttcacactcctcaaatgtatgatccaattgcaacaccatttctcatggatccacatttcgaggattttggacaatatttcgttccatcgtatgttccacctcttcaacaacttcctccagttaattctgttttcggaagctttgatatttcaatgaataatattgtcaacaatgagcaatatccacaatatccggaaattggaatgaactatgtgcaggtgcaagagcaggaaaatttggcaccg…	mypissssssstssppsnthntsyaygivdkdgnihshemhfshdhgnpspvhtpqmydpiatpflmdphfedfgqyfvpsyvpplqqlppvnsvfgsfdismnnivnneqypqypeigmnyvqvqeqenlaptprknsggrkpsafhhnsvcsnpncgtrqttlwrrtdsgaiecngcslyfrkngvqrpadlcnkvimkrnrrprvetqlpvsrgvsnlqeqstqqlqkienvqll	238
remanei	END-3		CREMA.Contig6	(2612545..2612794,2612848..2613021,2613072..2613291,2613342..2613471)	Cre-END-3/CRE05459	atgtactctcattcgttctcgtcttcatccttctcttcttcttctacaaattccaattctcctccatctactcaaatgtttggagctgataactcaatggttcaagtctatgaccaaggttacggtactcctgccccacagccaggcatgccgatggttcctccaatgaattatcatcattttccccaagatatgatgacaaatcaaccgttcgctatggctccagttgacaatggaatgatgttttatggtcaagatcaacagcagtttccacctatgcaataccagatgcaaccaatggtagatcaaggaattccacaggagttccagcagaactatcaacaagatatgtatcaacaagttccagatcagttgcaagtcatgaaccaggactttaat…	myshsfssssfsssstnsnsppstqmfgadnsmvqvydqgygtpapqpgmpmvppmnyhhfpqdmmtnqpfamapvdngmmfygqdqqqfppmqyqmqpmvdqgipqefqqnyqqdmyqqvpdqlqvmnqdfnymvnnevlddannaydfnkvpeqqqnenfnfgevparaprrrcskkkekkvstmhlntscsncgtretklwrrnergepecnpcnlyerfkgekrpqhlwnkptikrrrrpvapianevneefgn	258
nigoni	MED-1.1		CM008514.1	complement(6767744..6768907)	Cnig_chr_X.g23432/partial (theirs slightly longer at both ends)	atggcccaaatgaaccaaatcaaaatcgatctaatgagtttaccgatgcaagcaatggcttctcctttgagttcacaggattggaatactgtagctgcacgatatactgtaccggtagttcaagggccacagtatccaacaccaatatggacaccaaatcttatgaataaagctacccagactatggaggatactgtacctgcagttttggaagagaacaaggaagaaaatgtcaaagaaaatgaagctccacaattaccaaatggaattttcctagccaaaacgagccagctggaacagaatgagcccactcctagcaaatcgaactgcaaaaagtgctccaactgctcgatcaccgagtcatgtcaatggagaaatgtcacgtctagtaaagggata…	maqmnqikidlmslpmqamasplssqdwntvaarytvpvvqgpqyptpiwtpnlmnkatqtmedtvpavleenkeenvkeneapqlpngiflaktsqleqneptpsksnckkcsncsitescqwrnvtsskgilcnacfiyqrkyknnrsmkaiqdykkrqidlasspatqqaidplgsllaspaparnlamdplvsfpatqlasatstpkrfdissllalptsatplsmdpdaqlmarpsqlameapplcsklaqdsttplkapaspsaqnpttpkrngqrklleesqkcsncsitkscqwrnvkskehilcnacftyqrkykknrpmkaiqdykkkkidmpittqmqddlplplismeekeemtresvqeildrfqdladrdaakr	388	2 fingers, DBD one of two in the same contiguous ORF
nigoni	MED-1.2		CM008514.1	(6773336..6774454)	Cnig_chr_X.g23433/partial (theirs slightly longer at both ends)	atggcccaaatgaaccaaatcaaaatcgatctaatgagtttaccgatgcaagcaatggcttctcctttgagttcacaggattggaatactgtagctgcacgatatactgtaccggtagttcaagggccacagtatccaacaccaatatggacaccaaatcttatgaataaagctacccagactatggaggatactgtacctgcagttttggaagagaacaaggaagaaaatgtcaaagaaaatgaagctccacaattaccaaatggaattttcctagccaaaacgaaccagctggaacagaatgagcccactcctagcaaatcgaactgcagaaagtgctccaactgctcgatcaccgagtcatgtcaatggagaaatgtcacgtctagtaaagggata…	maqmnqikidlmslpmqamasplssqdwntvaarytvpvvqgpqyptpiwtpnlmnkatqtmedtvpavleenkeenvkeneapqlpngiflaktnqleqneptpsksncrkcsncsitescqwrnvtsskgilcnacfiyqrkykknrsmkaiqdykkrqidsasspatqqaidplgsllaspaparklamdplvsfpatqlasatstpkrfdissllasptsatplsmdpdaqlmarpsqlameapplcsklaqdstsplkapalpsaqnpttpkrngqrklleesqkcsncsitkscqwrnvkskehilcnacftyqrkykknrpmkaiqdykkkkidvsmeeeeemnresvqeildrfqeladrdaakt	373	2 fingers, DBD one of two in the same contiguous ORF
nigoni	MED-1.3		CM008514.1	complement(15650623..15651213)	Cnig_chr_X.g25125/exact	atgaactctcaattcactcctattcctactgccagtgttcctgacacgactattccctactcatactttgacactaattcgtggaattctgaacaccccaactggaattatctgaatacccaagccactgactattcggactacgccttatactcaaattactacgctcaatattacactgaattcatccaatgctcgacttccaatgccactactccttctccgactcaaagtcttcaaccagtaactgaaactatgttcccaccactcaactttgatttcaatgccacgactcctaactcaaattcaccaagtaccagctcaacattagctccagttcaactatctgccgatgtgccgattccatctacgaatacactcccaaatgctgcaacatgt…	mnsqftpiptasvpdttipysyfdtnswnsehpnwnylntqatdysdyalysnyyaqyytefiqcstsnattpsptqslqpvtetmfpplnfdfnattpnsnspstsstlapvqlsadvpipstntlpnaatcestsrqdsktrqcsncfvtkscrwnnitskdgilctacytyrrkykknrptkamerymrrnnil	197
nigoni	MED-1.4		CM008514.1	(16765156..16765539)	Cnig_chr_X.g25354/exact	atgatgctacttcgtacgtcgtctccaattcctcaacccgaacctgccactatgttccctccgctcaattttgattacaatgccacgactcccgactctagctctccaagtaccagctccacattggctccatttcaacaatctgccgaattgccgattcaatctacgaataaacttccaactgctgcatcatctgaatcaacatctcgccgggactccaaaactcatcaatgcactaattgtttcgtcactaaatcatgtcgatggagaaacatcacatccagtgagaggaccttgtgcactgcatgtttcacttaccgaaggaaatacaagaagaaccgtccaactaaagttattgaaaggtatatgcgtcggaataacttataa	mmllrtsspipqpepatmfpplnfdynattpdssspstsstlapfqqsaelpiqstnklptaassestsrrdskthqctncfvtkscrwrnitssertlctacftyrrkykknrptkvierymrrnnl	128
nigoni	MED-1.5	pseudogene	PDUG01000028.1	(114725..115732)	nigoni.pc_2016.07.11_028.g28660/partial (theirs with extra upstream)	atgtatgaaaatcgtgtttttgagtcgaaaactcattttttagtgtcaaattttcagctacccaatccaatggtcaacttgcaaatgatcctgatgaaccaaatcaaaatcgatttgatgagttcagcgatgtcgtctcctttgttttggaactttccggatgtagcagctacacaaaatatggagcaacattatccaacacccatctggtcacctgaatcgcttaatggagctacacaaaccatgaaggatactgtagcagtaaaggcttcggaagacaacgaaatgatcaatgaccaggaaaacgaggccccacaagtttcaatgaacccagccaccacaaaatcgataagccagcttgaccagatccaaaatgagcccactcctagcaaatcggac…	myenrvfeskthflvsnfqlpnpmvnlqmilmnqikidlmssamssplfwnfpdvaatqnmeqhyptpiwspeslngatqtmkdtvavkasednemindqeneapqvsmnpattksisqldqiqneptpsksdqkkcsncsitkscqwrnvksgegilcnacfiyerkykkirpmkaiqfykkrtinlpsspatklatnllisfpatklaqgpsashktpalkfsinsllaspkpatqsamnplslfpathsasatstpkrramdplsllaspapseqfaqdpttprhakamqsameasstpttpkrsakrkfleesqkmlqmldhhlmsmekrqi	336	larger, longer 3' end, but with a frame shift goes into MED1.6
nigoni	MED-1.6	pseudogene	PDUG01000028.1	(115668..115838)		aagaatcccaaaaaatgctccaaatgcttgatcaccatctcatgtcaatggagaaacgtcaaatctaaagaaagcttagtatgcaatgctagttacgtctaccgaagatacatcaaaaaggatcgtccgactaatgcaattgagagttataagagcagagctaatgaactttaa	knpkkcskclitiscqwrnvkskeslvcnasyvyrryikkdrptnaiesyksranel	57	MED1.5 and MED1.6 look together like a pseudogene derivative of MED1.1 or MED1.2 with a frame shift
nigoni	MED-1.7		CM008511.1	complement(7219130..7219882)	Cnig_chr_III.g9959/exact	atggatttccaatttccaactttttctactgccagtttccttgacacatcgtcagttcccagtacctcttcatgggattcaggacttgtcaatggatccacgacatatctggatacaagcaccaactactctgactattcgtactattctaactattatgcaaactactacgcttcttttcttcaatgcttaaattcgaatactccaacggcaactgttgtgccatctccaactgcaactactcaaacatcgacggatttatcatggaatggatttcacaacaacttcaacgtttcttcgtcgtcaatttcaagttttgcatcgacatcagtttcgaattcaaccgtcgtgccttctccaactgcaactcctcaaacacccataggtttatcgtggaac…	mdfqfptfstasfldtssvpstsswdsglvngsttyldtstnysdysyysnyyanyyasflqclnsntptatvvpsptattqtstdlswngfhnnfnvssssissfastsvsnstvvpsptatpqtpiglswnglqfnnfnfgsasvsnspsssstgftpspfsatslntvpvpttgfpfsptgpttprisktytkqcsncfitescqwrnvtsregmlcnacftyrrkykkdrptaaiekyrsqkrgkql	251
nigoni	MED-1.8		CM008511.1	(7221433..7222185)	Cnig_chr_III.g9960/exact	atggatttccaatttccaactttttctactgccagtttccttgacacatcgtcagttcccagtacctcttcatgggattcaggacttgtcaatggatccacgacatatctggatacaagcaccaactactctgactattcgtactattctaactattatgcaaactactacgcttcttttcttcaatgcttaaattcgaatactccaacggcaactgttgtgccatctccaactgcaactactcaaacatcgacggatttatcatggaatggatttcacaacaacttcaacgtttcttcgtcgtcaatttcaagttttgcatcgacatcagtttcgaattcaaccgtcgtgccttctccaactgcaactcctcaaacacccataggtttatcgtggaac…	mdfqfptfstasfldtssvpstsswdsglvngsttyldtstnysdysyysnyyanyyasflqclnsntptatvvpsptattqtstdlswngfhnnfnvssssissfastsvsnstvvpsptatpqtpiglswnglqfnnfnfgsasvsnspsssstgftpspfsatslntvpvpttgfpfsptgpttprisktytkqcsncfitescqwrnvtsregmlcnacftyrrkykkdrptaaiekyrcqkrgkql	251
nigoni	MED-1.9		CM008512.1	complement(1199312..1200358)	Cnig_chr_IV.g12209/partial (mine longer 5' end)	atggacctaatttcaccattcttgaaaagaatttctcaagccaaaactaactttgatccagtgccgatgagccagctcgaccagaatgagctcccaatcttgaatggagcatccttgacgaattccaatgatcctactccaagcaaaccagactgcaaaaagtgctccaactgcttgatcaccaagacctgtcaatggagaaatgtgaagtctggtgaagggatactgtgccaagcctgctatacctatgtgaggaagtacaagaagagccgtccaatgaaagcgattctggattataagaaaaggataattgatttatcatctacgaagctcaacccatcaactatggataagctaagttcgcttctagattcaccaactctagctactctgtcttat…	mdlispflkrisqaktnfdpvpmsqldqnelpilngasltnsndptpskpdckkcsnclitktcqwrnvksgegilcqacytyvrkykksrpmkaildykkriidlsstklnpstmdklsslldsptlatlsytealptpttklaqgpstprktpakqfsissllaspapatklamdplslfpatqlasatstpkrramnpmsllaspspatvaqdpttsgmsrpspatqsameasptpsklaqdpttprnasaiqsameasptpatvaqapapqlsqnqstpkrsskrklleesqtcsncsitnscqwrnikskeavlcnacyvyrryikkdrptsaiesyknrinef	349	2 fingers, DBD one of two in the same contiguous ORF
nigoni	MED-1.10		CM008512.1	complement(1205382..1206512)	Cnig_chr_IV.g12211/partial (mine slightly shorter)	atggatttgatgagtgtagcgatggcgtctcctttgttttggaactttccggatttggcagctacacagaatatggaccaacagtatccaacacccatctggacaccgcaggatactgtacctgtaaatcaagagttacatggagctacacacaatatggaggatactttagcagcagaagcttcggaagacagcgaaatgatcaatgaccaagagaacgagaccccacaaattccaatggacccaatttcaccattctggaataaaccgttgagccagcttgaccagatccaaaatgagcccactcccagcaaatcggtctattccaaaaaatgctccaactgctcgatcaccaagacctgtcaatggagaaatgtgaagtctggtgaagggatactg…	mdlmsvamasplfwnfpdlaatqnmdqqyptpiwtpqdtvpvnqelhgathnmedtlaaeasedsemindqenetpqipmdpispfwnkplsqldqiqneptpsksvyskkcsncsitktcqwrnvksgegilcqacytyvrkykksrpmkaiqnykkrvidssptklnplamdklssllaspflatlsytealptpatqlaqgpstprkapakqfsissllaspvpakklamnplslfpatqlasatstpkrramdslsllaspspatvaqapttprnasviqsameapptpatvaqpsttpvapnpstpkrsakrklleesqtcsncsitnscqwrnikskesvlcnacyvyrryikkdrptsaienyksrlnel	377	2 fingers, DBD one of two in the same contiguous ORF
nigoni	END-1		CM008513.1	(416551..416782,416830..417017,417066..417166,417730..417916)	Cni-end-1.2	atgtatccaatttcttcctcatcctcctctgcatcatcctcctcttcaaccccacctcttgctccttatacctatggagttatggataaagatggaaacatcgtggcccatgaaatgcatttttcggaggaccatggtaacccatctccagtccatactccaacgatgtacgaaccgactggatcccaatacatgatggatcctctttatgaggattttgggcaatattttgttcccccttacgttgctcctgctgctccagttgttccagtcaactcaatgttcggaaattttgatatgtccatgaatcaaaactatctacagtatccccagttcggacaaaactacatggcacaggaaaactttgtaatgcaggtgaaggagaagaaaagtgccgga…	mypissssssassssstpplapytygvmdkdgnivahemhfsedhgnpspvhtptmyeptgsqymmdplyedfgqyfvppyvapaapvvpvnsmfgnfdmsmnqnylqypqfgqnymaqenfvmqvkekksagkssgirkpstfhhnsvcsnpscgtrqttlwrrtdsgaiecngcslyfrkngvqrpadlcnkqilkrnrrpraspgvpviqintavvhqehnhtteqlhadrll	236	C nigoni in wormbase says two end-1 orthologs, but these are alternate splice predictions differing by one amino acid
nigoni	END-3.1		CM008513.1	complement(479159..479318,479368..479782,479916..480120)	Cnig_chr_V.g16455	atgtactcccaatctttctcttcttcttcttcgaccaattccaattatactgctcctatcgatccaacgttccattctcaaggattcgatatgggttacggtactccatcccctggaatgcctatggattataacaacatgatgacaaatcaacaatttggaccagatgcaatgggaccaccaaacgatggaatgatgttttatggtcatcaacagttccctccaatggctgaacaatttccaatgatggacttccaaatgatgccagaacaaaatatggattcaggatttcagcaaaacttccaactcggattccagcaagaccattttcaaccacaaccgattccaatggctcagattcacagacaagaaagttcttccaactcatcggcagatttc…	mysqsfssssstnsnytapidptfhsqgfdmgygtpspgmpmdynnmmtnqqfgpdamgppndgmmfyghqqfppmaeqfpmmdfqmmpeqnmdsgfqqnfqlgfqqdhfqpqpipmaqihrqesssnssadfdfngvngnlangfpappvhdynfaassppapkrkftkkkvpkvstmhlntscsncgtretklwrrneqgepecnscnlyertkgvkrpatlwnkptikrrrrpaaapviqernddvdgwnqsffhit	260
nigoni	END-3.2		CM008513.1	complement(496324..496462,496515..496938,497029..497239)	Cnig_chr_V.g16463	atgtactcccagtctttctcttcttcttcttcttcttcgaccaattccaattacactgctcctatcgatccaatgttccattctcaaggattcgatatgggttacggtactccatcccctggaatgcttatggattatgataacatgatgacaaatcaacaatttggaccagatgcaatgggaccacaaaacgatggattgatgttttatggtcatcaacaattccctccaatggctgaacaattcccaatgatggacttccaaatgatgccagaacaaaaaatggattcaggatttcagcaaaatttccaactcggatttcaacaagaccatttccaacaacatcggattccagtggctcagattcacagacaggacagttcttcgaactcgtcggca…	mysqsfssssssstnsnytapidpmfhsqgfdmgygtpspgmlmdydnmmtnqqfgpdamgpqndglmfyghqqfppmaeqfpmmdfqmmpeqkmdsgfqqnfqlgfqqdhfqqhripvaqihrqdsssnssadvdfngvngnlvngmngfpappgndynfpttsppapkrkftkkkvskvstmhlntscsncgtretklwrrneqgepecnscnlyertkgvkrpatlwnkptikrrrrpaaapvtqernddvggwn	258
nigoni	END-3.3		CM008513.1	(503127..503340,503464..503878,505596..505734)	Cnig_chr_V.g16465	atgtactcccagtctttctcttcttcttcttcttcttcttcgaccaattccaattacactgctcctatcgatccaatgttccatgctcaaggattcgatatgggttacggtactccatcccctggaatgcctatggattataacaacatgatgacaaatcaacaatttggaccagatgcaatgggaccaccaaacgatggaatgatgttttatggtcatcaacagttccctccaatggctgaacacttcccaatgatggacttccaaatgatgccagaacaaacaatggattcaggatttcagcaaaacttccaactcggattccaacaagaccatttccaaccacatccgattccaatggctcagattcacagacaggatagttcttcgaactcatct…	mysqsfsssssssstnsnytapidpmfhaqgfdmgygtpspgmpmdynnmmtnqqfgpdamgppndgmmfyghqqfppmaehfpmmdfqmmpeqtmdsgfqqnfqlgfqqdhfqphpipmaqihrqdsssnssadfdfdgmngnlangfpapsgsdynfattsppapkrkftkkkvpkvstmhlntscsncgtretklwrrneqgepecnscnlyertkgvkrpatlwnkptikrrrrpaaapvtqdgnndvdgwn	256
briggsae	MED-1.1		LG IV	complement(1080575..1081660)	CBG13715/partial (theirs is longer at 5' end)	atggacctgatgaaccaaatcaaaatcgatttgatgagtttagcgatgtcgtctccgttgttttggaactttccggatttggcagctacacagaatatggagcaacagtatccgacacccatctggacaccgcatgatactgtacctataaatcaagaggcttcggaagagaaagaagaagacgtcaaagaaaatgaggctccacaattcacaaatttcccagccaacacaaggtcgatgtgccagcttgatcagaatgagcccactcctagcaaatcggaatccaaacagtgctccaactgctcgatcactaaatcctgtcaatggagaaatgtcacatctagcgaagggatactgtgcaatgcttgctttgtctatgagaggaagtacaagaagagc…	mdlmnqikidlmslamssplfwnfpdlaatqnmeqqyptpiwtphdtvpinqeaseekeedvkeneapqftnfpantrsmcqldqneptpskseskqcsncsitkscqwrnvtssegilcnacfvyerkykksrpmkaiqhykkrtndfpsspatklaqgpstpcktpatrlameslssfpatqfasatstpkrramdplsllasptpatqsytealptsatqlvqdpatstpkrramdplsllasptpgtvaqapttprmsrpspatqlameasptpsklvqdpttpvapnsatpkrsyrrklleesqkcsncsiinscrwrnvkskestlcnacfvyrryikkdrptsaiesyksrinem	362	2 fingers, DBD one of two in the same contiguous ORF
briggsae	MED-1.2		LG III	complement(6504071..6504679)	CBG18155/exact - Cb-MED-2 from before	atgaatttccaatttccaactttctctaccgccagtttcctggacacttcttccgttcccagtacctcttcatgggattcaggagttgtcaatagatccacgacatatctggatactcaaagcacaaactattctgactattcctattattcaaactactacgcaaactactacgcttcttttcttcaatgtttaaattccaatacttcaacggcaacagtcgtgccttcgccaactgcaacttctcaaacgtcgatggatttatcatggaacggatttcaaaacaacttcaacgtttcttcgtcgtcaatttcaagttccccaagttctagctcaactggattcactccattttctgccaattcgccaacaatgccaactccagctttcacactctcg…	mnfqfptfstasfldtssvpstsswdsgvvnrsttyldtqstnysdysyysnyyanyyasflqclnsntstatvvpsptatsqtsmdlswngfqnnfnvssssissspsssstgftpfsansptmptpaftlsptgsttpriaktytkqcsncfitescqwrnvtsregmlcnacftyrrkykknrptaaiekyrcqkrekql	203	similar to C.nigoni MED1.7/1.8
briggsae	MED-1.3		LG III	(6506016..6506624)	CBG18154/exact- Cb-MED-1 from before	atggatttccaatttccaactgtctctaccgccagtttcctggacacttcttccgttcccagtacctcttcatgggattcaggagttgtcaatagatccacgacatatctggatactcaaagcataaactattctgactattcctattcttcaaactactacgcaaactactacgcttcttttcttcaatgtttaaattcaaatacttcaacggcaacagtcgtgccttcgccaactgcaacttctcaaacgtcgatggatttatcatggaacggatttcaaaacaacttcaacgtttcttcgtcgtcaatttcaagttccccaagttctagctcaactggattcactccattttctgccaattcgccaacaatgccaactccagcttccacactctcg…	mdfqfptvstasfldtssvpstsswdsgvvnrsttyldtqsinysdysyssnyyanyyasflqclnsntstatvvpsptatsqtsmdlswngfqnnfnvssssissspsssstgftpfsansptmptpastlsptgsttprnaktytkqcsncfitescqwrnvtsregmlcnacftyrrkykknrptaaiekyrcqkrekql	203	similar to C.nigoni MED1.7/1.8
briggsae	MED-1.4		LG X	complement(14741969..14742220,14742306..14742548)	CBG00186/partial-only first exon included	atgagctctcaattcactccaattgctactgacagtgttcctgacacgactattccatactcatactttgacactaattcttggaattcggaaaatcacaactctaattatttgaatactcaatccactgactactccgactacaccttatattctaactactacgcttattattatgctcaattcttccaaagattgagttcaaatgtttctattccctctccaactcgaattcctcaaccagctccatttccaacaactttcgatgtgccgattcaattgacgaaaacatcaactgctgcatcaaaatctcgcctagaatccaaaactcatcaatgcactaattgtttcgtcactaaaacctgtcaatggagaaacatcacatccagtggtgggatc…	mssqftpiatdsvpdttipysyfdtnswnsenhnsnylntqstdysdytlysnyyayyyaqffqrlssnvsipsptripqpapfpttfdvpiqltktstaasksrleskthqctncfvtktcqwrnitssggilctacftyrrkykknrptkaierymrflvqfi	165	needs an intron/splicing to avoid a frame shift; paralogous to CBG15489/CbriggsaeMED1.5
briggsae	MED-1.5		LG X	(15706631..15707209)	CBG15489/exact	atgaactctcaattggcgcctatttctactggcagtgttcctgacacgcctattccatactcctacgcagatgcgcattattggaattctggaaatctcaactggaattatctgaatactcaagccactgactactcggactacaccttatattccaactactacgcgtattattatgctcaattcttccaaagtttgagttcaaatgtttctactccctctccaactcaaattcctcaacgcgaacctgccactatgttacctccgctcaactttgatttcaatgccacgactcctaaccctagctcaccaagtaccagctccacgttggctccaatgcaactatctgccgaaatgccgattcaatctctgactactgtaacatgtgaatcaacatct…	mnsqlapistgsvpdtpipysyadahywnsgnlnwnylntqatdysdytlysnyyayyyaqffqslssnvstpsptqipqrepatmlpplnfdfnattpnpsspstsstlapmqlsaempiqslttvtcestsrrdsktrqctncfvtktslwrnvtssegilctacftykrkykknrptkaierymrrnrnl	193
briggsae	END-1		LG V	(394638..394869,394915..395105,395155..395255,395830..396016)	CBG11413/exact - Cbr-END-1	atgtatccaatttcttcctcatcctcttctgcatcctcctcctcttcaaccccacctcttgctccttatacctatggagttatggataaagatggaaacattgtggcccatgaaatgcttttttcggaggaccatggtaagccatctccagtccatactccaactatgtacgaaccgactggatcccaatacatgatggaccctctctatgaggattttggacaatattttgcagttcccccttatgttgctcctactgctcccgtggttcctgtcaacccaatgttcggaagtttcgacatgtccatgaaccaaaactatctacagtatccccagtttggacaaaactacatggcacaggaaaatttggtaatgcaggtgaaggagaagaaaagtact…	mypissssssassssstpplapytygvmdkdgnivahemlfsedhgkpspvhtptmyeptgsqymmdplyedfgqyfavppyvaptapvvpvnpmfgsfdmsmnqnylqypqfgqnymaqenlvmqvkekkstgkssvirkpstfhhnsvcsnpscgtrqttlwrrtdsgaiecngcslyfrkngvqrpadlcnkqilkrnrrpraspgvpviqvntavvhqehnqttepmhagrll	237
briggsae	END-3.1		LG V	complement(424326..424437,424485..424923,425040..425247)	CBG11406/exact - Cbr-END-3.1	atgtactctcaatctttcgcttcttcttcttcgtcgaccaattccaattacactgttcctatcgatccaatgttccattatcaaggattcgatatgggatacggtactccatcccctggaatgcctatggattataacaacatgatgacaaatcaacaatttagatcagattcaatgggaccaccgaacgatggaatgatgttttatggtcatcaacagttccctccaatggctgaacaattcccaatgatggattttcaaatgatgccagaacaagctatggattcaggatttcagcaaaacttccaactcggattccaacaagaccgtttccaaccacttccccatcagattccaatggctcagtctgatataattcatagacaggacagttctttg…	mysqsfassssstnsnytvpidpmfhyqgfdmgygtpspgmpmdynnmmtnqqfrsdsmgppndgmmfyghqqfppmaeqfpmmdfqmmpeqamdsgfqqnfqlgfqqdrfqplphqipmaqsdiihrqdsslnsspdvdfnevngnfvngmngfpappvndynfsttsppppkrkftkkkvpkvstmhlntscsncgtretklwrrneqgepecnscnlyertkgvkrpatlwnkptikrrrrpvvapvtqe	253
briggsae	END-3.2		LG V	(428272..428479,428583..429006,429055..429166)	CBG11404/exact - Cbr-END-3.2	atgtactctcaatctttcgcttcttcttcttcgtcgaccaattccaattacactgttcctatcgatccaatgttccattctcaaggctttgatatgggttacggtactccatcccctggaattcctatggattataataacatgatgacaaatcaacaatttagatcagatgcaatgggaccaccgaacgatggaatgatgttttatggtcatcaacagttccctccaatggctgaacagtttccaacgatggacttccaaatgatgcctgaacaaactatggattcaggatttcagcaaaacttccaattcggattccaacaagaccagttccaaccacatccgattccaatgacacagattcacagacaggacagttcttcgaactcgtcgccagat…	mysqsfassssstnsnytvpidpmfhsqgfdmgygtpspgipmdynnmmtnqqfrsdamgppndgmmfyghqqfppmaeqfptmdfqmmpeqtmdsgfqqnfqfgfqqdqfqphpipmtqihrqdsssnsspdvdfnevngnfvngmngfpappvndynfsttsppppkrkftkkkvpkvstmhlntscsncgtretklwrrneqgvpecnscnlyertkgvkrpatlwnkptikrrrrpvvapvtqe	248
zanzibari	MED-1.1		CSP26.scaffold02581	(6561..7052)	CSP26.g19428.t1/exact	atgttctccccatattctctcttcccagccaactttggcactgctactcctgaatcttcttattcttggaatccgaatccagggtatactcctcctccagctacccctatttactatcaacaaatgaatggatattccttcacctcaacgaccatgaacttgtcccttataccaactacacatacagtacccaattatcctccaactttctcacaaggattccaaactcccgaatctcttccaaccactccaggatcctcttcatcgactccacccggaccccaactttcagattcacctcctaccagaaagccacaaagaatatgctcccattgccacgtcagcgaatcgtgtcgatggatgaatgtgaaatcgagagatgcaattttatgcaacgcc…	mfspyslfpanfgtatpessyswnpnpgytpppatpiyyqqmngysftsttmnlsliptthtvpnypptfsqgfqtpeslpttpgsssstppgpqlsdspptrkpqricshchvsescrwmnvksrdailcnacfiyrrkykvnrpidvavrylkrksekrvkn	164	best match MED2
zanzibari	MED-1.2		CSP26.scaffold00237	complement(192340..192816)	CSP26.g4204.t1/exact	atgttctgcccatattctctcttcccagccaactttggcactgctactcctgaatcgtcttattgttggaatccaaatccaggttatactccaccttactatcccccacttccacaaataaatggatattccttcacttcaacgaccatgaacctgtcccttataccaactacacctacagtatccaattctcctccacctggattccaaacccctgaatctctaccaaccactccaggatcctcttcatcgactccacccggaccaacattttcagattcacctcctaccagaaagccccaaagaatatgctcccattgccacgtcagcgaatcgtgtcgatggatgaatgtgaaatcaagagatggaattttgtgcaacgcctgtttcacctatcga…	mfcpyslfpanfgtatpessycwnpnpgytppyypplpqingysftsttmnlslipttptvsnspppgfqtpeslpttpgsssstppgptfsdspptrkpqricshchvsescrwmnvksrdgilcnacftyrrkykvnrpidvavrylkrksekgvkn	159	best match MED2
zanzibari	END-1		CSP26.scaffold00511	(67851..68085,68129..68328,68746..68846,68892..69045)	CSP26.g8632.t1/exact	atgtatcaaatctcctcatcctcttcttcttcatcatcctccctgactcccccaccatcccaacatgttccatatacatatggagtcatggataagcacggaaacatagttgctcatgagatgcatttctctgatgatcatggaaatccatctcccgtgaatactcccatgtacgatccagctccacagcagtatatgatggacccgaattatgaggactttggacaatacttcattccaccatatgtagcaccccttgcgcctatgggaccacttcctccagttaattccatgttcggaagtttcgatgtttcaatgaacaacaataattatatagagtatcctcaaatgactcaagcatttctaccaattcaaaatgagaatatgaacgtggtgccg…	myqissssssssssltpppsqhvpytygvmdkhgnivahemhfsddhgnpspvntpmydpapqqymmdpnyedfgqyfippyvaplapmgplppvnsmfgsfdvsmnnnnyieypqmtqaflpiqnenmnvvptkkkttakanrkpstfhhnsvcsnpscgtrettlwrrtdsgaiecngcslyfrkngvqrpadlcnktilkrnrrpraepvirvaadvvdtpehnqll	230	best match END1, has CSNPSC
zanzibari	END-3.1		CSP26.scaffold00511	complement(5673..5796,5850..6255,6308..6557)	CSP26.g8606.t1/exact	atgtacacacaatctttcttgtcttcttcatattccacatcttctaattcgaatactcccccaactccatctactatggatccaatgtaccagaatattccacaacccttcgaccacggttacagtaatccaactcaacaattggatatgggaatgatgggatatcatcaaccgaacaatatgatgatgatgatgcaaccgtttggtcgaaatgttatgatcccagctaacaacgaaactgattattacggccatcaattacaagatttgaatcagcagtacccattggattatcagatgatgccgcagcaaatgatggttccagaaactctacagaattaccaaggaggattccaacaggacgttttccaaccaatcccggaactaatgccaaatggc…	mytqsflsssystssnsntpptpstmdpmyqnipqpfdhgysnptqqldmgmmgyhqpnnmmmmmqpfgrnvmipannetdyyghqlqdlnqqypldyqmmpqqmmvpetlqnyqggfqqdvfqpipelmpngqhdfgyldntqesgtpdfhngienlppipvdnysfinsqpsaprrkstkkkvpkvstmhlntscsncgtretklwrrnemgeaecnpcnlyhrttgvkrpeslwnkptikrkrrapaapvvqnlkne	260	best match END3
zanzibari	END-3.2		CSP26.scaffold00511	complement(123398..123518,123569..123974,124026..124275)	CSP26.g8649.t1/exact	atgtactctcaatcgttcttgtcttcttcttcttattcctcgtcgtctaattcctatactcccccaactccttctactatggatccaatgtaccagaatgttccacaatctttcgaccagggttacggtaatccaactcaacaattggatatgggaatgatggggtatcaaaaacaggacaatatgatgatgatgcaaccgttcggtcaaaatgttatgatccaagcaaacaacgaaactgattactacggccaacaatttcaagatttgaatcaacaatatccattggattatccgatgatgccgcagcaaatgatggttccagaaactctacagaattaccaaggaggattccagcaggatattttccaaccaatcccagaactaatgccaaatggc…	mysqsflssssyssssnsytpptpstmdpmyqnvpqsfdqgygnptqqldmgmmgyqkqdnmmmmqpfgqnvmiqannetdyygqqfqdlnqqypldypmmpqqmmvpetlqnyqggfqqdifqpipelmpngqhafgylentqesgtpdfhnefenlppmpvdnysfitpqpsaprrkstkkkvpkvstmhlntscsncgtretkmwrrndkgeaecnacnlykrttgqsrpeslwnkptikrkrrapaapvvqdlkn	259	best match END3, has CNAC not CNPC
sinica	MED-1.1		CSINI.Csp5_scaffold_01543	complement(15493..16065)	CSINI.Csp5_scaffold_01543.g21601.t1/exact	atgtttttccaatacccattccctgctggctggatgctcactgagcctatccttgactcttcttatacctcgaacactagttatgttcctgagccgactagcctccacaattatcctcctctctttcaaccagtcaatggatactcatttgtttctaattcaacaccctcgtactcttttgcgactccaacgtgcttaggtcccagttttcaagcattgcaagaattcaacttcccacctggatctttttcaacttcgccattcacttcaacaagtccatgctcaaccagtggaacctcaacgtcctccccaccctcaacagaatcaatgtcaccgaaaaacatctccacatcgtcagcttcaaacgacttcacctggagaccaccaaagccaagagca…	mffqypfpagwmltepildssytsntsyvpeptslhnypplfqpvngysfvsnstpsysfatptclgpsfqalqefnfppgsfstspftstspcstsgtstssppstesmspknistssasndftwrppkpracsncyvsetcrwmnvkseegmlcnacftyrrkykrdrpldvamkyskrrskdgvkssn	191	best match MED2
sinica	MED-1.2		CSINI.Csp5_scaffold_00253	complement(61863..62435)	CSINI.Csp5_scaffold_00253.g8030.t1/partial	atgtttttccaatacccatttccttctggctggatgctcactcagccaattcctgactcttcttatgcctcgaacagtggttatgttcctgaaccgaccagccttcacaattatcctccactctttcaaccagtctatgattactcatgtgtttctaatccaacatcctcgtactcttttgtgactccaacttgcccaggtcccaattatcaagcattgcaaccatttaacttcccacctagatcttttttaacttcaccatccacttcaacaagttcatgctcaaccagcggaacctcaacgtcttccccaccctcaacggaatcaatgccaccaaaaaacatctccacatcgtcaacttcaaacgacttcatctggagaccagcaaaaccaagagct…	mffqypfpsgwmltqpipdssyasnsgyvpeptslhnypplfqpvydyscvsnptssysfvtptcpgpnyqalqpfnfpprsfltspststsscstsgtstssppstesmppknistsstsndfiwrpakpracsncyvsetcrwmnvkseegmlcnacftyrrkykrdrpldvalkyskrrskdgvkssn	191	best match MED2
sinica	END-1		CSINI.Csp5_scaffold_00888	complement(28272..28464,28716..28816,28868..29058,29104..29338)	CSINI.Csp5_scaffold_00888.g16498.t1/exact	atgtatccaatatcctcatcgtcctctttttcctcgtcctcactgactcctccaccatctcaacatgttccgtatacgtatgcgattgtggataagcatggaaacatcgcgcatcatgaaatgcacttccctgaagatcatggaaacccatccccagtgccaactccaatgtacgagacagcgccacaacaatatatgatggatccgcattatgaggactttgggcagtactttgcagtaccaccttatgttccaccaatgactcctctccctcctgtcaattcgatgttcggaagttttgacgtctcgatgaataacaactatatggagtatccaccaatggggcagacttttataccggttgagaccaatgtgatgggaacgaaacagaagaaaagt…	mypisssssfssssltpppsqhvpytyaivdkhgniahhemhfpedhgnpspvptpmyetapqqymmdphyedfgqyfavppyvppmtplppvnsmfgsfdvsmnnnymeyppmgqtfipvetnvmgtkqkkssgkshgnrkpstfhhnsvcsnpncgtrettlwrrtdsgaiecngcslyfrkngvqrpadlcnktilkrnrrpradpvirviqvtpieteenpidqplhvevgnnqll	240	strong match with END1, has CSNPNC
sinica	END-3.1		CSINI.Csp5_scaffold_01031	(25684..25936,25987..26175,26224..26440,26490..26631)	CSINI.Csp5_scaffold_01031.g17749.t1/exact	atgtactctcaatcgttctcgtcttcttcctattcctcgtcttctaattccaatactcccccaaataccgttgctgatccaatctacctggatattccacaatcctttgaccagggttacgataatcctgttcagccattggatatggaattgatgggttatcatcagcagaacaacatgatgatgatggaacatcaaccatttggtgctgatcctatgttggagccagacaacggagctgctgattattacggtcagcaatatcaggtcatggatcaacagtaccaaatggactatcaaatgatgcagcaccaaatgatgatgccagcagctccacagaatttccagccggaattccaactggacctcttccaaccaatgccacaacaaatgccaatt…	mysqsfssssyssssnsntppntvadpiyldipqsfdqgydnpvqpldmelmgyhqqnnmmmmehqpfgadpmlepdngaadyygqqyqvmdqqyqmdyqmmqhqmmmpaapqnfqpefqldlfqpmpqqmpieqldfdfignnggldtpnifnglenlpprptdnydfinaqppaprrkstknkapklstmhintsctncgtretklwrrnekgepecnpcnlyerfkgekrpphlwnkptikrkrrapaaqivpvlqeakdemhe	267	best match strong with END3
sinica	END-3.2	pseudogene	CSINI.Csp5_scaffold_00649	(2..104,154..569,620..761) PARTIAL SEQUENCE - scaffold starts mid-gene	CSINI.Csp5_scaffold_00649.g13993.t1/partial (all but first aa)	gaagaacctaggcggagccactacaacatgatgatgatggcaaatcaaccatttggtgctgatggtatgatagagccagacaacggagccgctgattattatgcagcaatatcaaggcatggatcaacagtaccaaatggattatcagatgatgcaacagcaaatgatgatgccagcagctccacagaatttccagccggaattccaacaagaataccaacaggatgcatttcaaccaatgccacaacaaatgccaattgaccatcaggattttggatatatgggaaacttccatgcagtaggaacatcaaatgtcttcaacggattcgagaacctccctccaatgccaaccgacaactacgatttcatcaatgctccgcctccagcaccgagaagaaa…	eeprrshynmmmmanqpfgadgmiepdngaadyygqqyqgmdqqyqmdyqmmqqqmmmpaapqnfqpefqqeyqqdafqpmpqqmpidhqdfgymgnfhavgtsnvfngfenlppmptdnydfinapppaprrkstkkkvpkvstmhlnsscsncgtretkmwrrnekgetecnacnlyksstgetrpahlwnkptikrkrrapaaqvvpvlqdvrdemhe	221	possible false duplicate of CsiniEND3.3?
sinica	END-3.3		CSINI.Csp5_scaffold_02145	(10270..10522,10572..10977,11028..11172)	CSINI.Csp5_scaffold_02145.g25100.t1/exact	atgtactctcaatcattctcctcttcttcctattcctcatcttctaattctaatactccgccaaataccgttactgatccaatgtaccaggatattccacaatcctttaaccagggatacggtaatcccgttcagccattggatgtggaattgatgggttatcatcagcagaacaacatgatgatgatggaacatcaaccatttggtgctgatggtatgatgcagccagacaacggagccgctgattattatggtcaacaatatcagggcatagatcaacagtaccaaatagactatcaaatgatgcagcaccaaatgatgatcccagcagctccacagaactttcaaccagaatttcaacaagatgcattccaaccacttccacagcaaatggcaatt…	mysqsfssssyssssnsntppntvtdpmyqdipqsfnqgygnpvqpldvelmgyhqqnnmmmmehqpfgadgmmqpdngaadyygqqyqgidqqyqidyqmmqhqmmipaapqnfqpefqqdafqplpqqmaidhqdfgymgnfnaagasnvfngfenlspmptdnydfinaqppaprrkstkkkvpkvstmhlnsscsncgtretkmwrrnekgetecnacnlyksstgetrpahlwnkptikrkrrapaapvvpvlqevkdeemhk	268
sinica	END-3.4	pseudogene	CSINI.Csp5_scaffold_03835	complement(7969..8641,8687..9294) PARTIAL SEQUENCE - scaffold starts mid-gene	CSINI.Csp5_scaffold_03835.g31380.t1/partial	cgcagaggtcatcaagattggaaagacggttacagtgttcataaccaacaatacaagcaaggggtctactacgagaaccaaaacttttccggaaagcaaggaatgacactgagtagccagccggatttgactcgggaatctccaaagtctgtggaccacgcatattttcctccagttgagccatatgacacggaattgacgggttatcatcaacataacaacatgatgatggcgatggaccaaggtcaacgcacaaatcaacagtatcaaatggattatcaaatgcaggaacatcaaataatgatgccaggattttcccagaacttccagccggattttcgaccggatttgttccaaccactcccacaacaaatacccaatgagcaactgaatttcgat…	rrghqdwkdgysvhnqqykqgvyyenqnfsgkqgmtlssqpdltrespksvdhayfppvepydteltgyhqhnnmmmamdqgqrtnqqyqmdyqmqehqimmpgfsqnfqpdfrpdlfqplpqqipneqlnfdfignnggfvnlpptdnddfmtapspaprrnsrkkkvpkvssmhrnsscsncgtvetsmwrrsvkgeiecnscnlyestmgqtrprhlwnkptmkrkrrtpalsavlavqdeynvengrddfdfdrpsfqqhdkmnyeeameniseetkpeealterqstsvrdllvllrgsvmsvesptlnrllkdieskivkigngnqqipleninvpfepfllmdqdalkyppeeksislrdflislktaicyinhrsmdtfnrklkkiieela…	423	odd homolog, only DBD and basic partially conserved, protein is very large outside that and has strong homology to other coding regions in the genome that do not have homology within the DBD; this picks up only other Caenorhabditis proteins, hypothetical
tribulationis	MED-1		CSP40.scaffold00043	(6265..6801)	CSP40.g1178.t1/partial (they have exons adding 353aa up front, and 224aa at carboxyl end, losing 20aa of my predicted carboxyl end)	atgtcctctcaaccatccctctactctgcaaactccatgttcgggactattggtcccgataactcttattccgggaactcggttcttttccctatctactaccctccactcttcccaccactcaacggattcttgcccgttgcaaactcaacaacgacggattctcatctgctgccgcctgagccggaaggtttccacttccaaccatggcaaggattctcattcacaaatggatcgcttccaacatctccaaccacttcaaccagttcaacctctaccacggagtccccttcattcgtgatgccatcaacacctccatcgcctacatcttcgaagaaagtcacctggaaacggtcgaaaccagctagaatgtgcaccaactgctccgccacggaatcc…	mssqpslysansmfgtigpdnsysgnsvlfpiyypplfpplngflpvanstttdshllppepegfhfqpwqgfsftngslptspttstsststtespsfvmpstppsptsskkvtwkrskparmctncsatesckwrnvkseeevvcnacfvyrrkykrvrplgvaekysnrkegkqfs	179
tribulationis	END-1		CSP40.scaffold00267	complement(233064..233259,233759..233859,233904..234109,234155..234395)	CSP40.g7606.t1/exact	atgtatccaatatcttcttcgtcctcttcttcatcatcctcatcctcattcactcctccaccaactcaacatgttccgtatacatacggagttatggacaagcacgggaatattgttgctcatgaaatgcattttcctgaggatcatggcaatccgtctccagtgaacacatccatgtacgagccagctccacagcagttcatgatggaccctctttacgaggacttcgggcaatactttgcggtccctccatatgtagcacccctggcacccatggggcctctccctccagtaaactccatgttcggaagtttcgacgtctccatgaacaacaacaacaactacatggagtatccaccaatgaatcagacatatcaacatgtgaatacagagaatgcg…	mypissssssssssssftppptqhvpytygvmdkhgnivahemhfpedhgnpspvntsmyepapqqfmmdplyedfgqyfavppyvaplapmgplppvnsmfgsfdvsmnnnnnymeyppmnqtyqhvntenaamsmkpkkstgkavrkvstfhhnsvcsnpscgtrettlwrrtdsgaiecngcslyfrkngvqrpadlcnktilkrnrrpradpvvrvisvasdvddqgdhvnqplhvnvehnqll	248
tribulationis	END-3.1		CSP40.scaffold00267	(292508..292745,292800..293196,293245..293374)	CSP40.g7633.t1/partial (they omit the first part up to the next methionine)	atgtactctcaattatcgtcctcttcctactcctcaccctccaattctaactctcctccaacccctgctgtcccaatgtatccagacattccacaacctttccatcaaggcttcgcaaacccagctcagtcatttgacatgggaatgatgggctatcagaacaatatgatgatgatgccgaatcagccatttgttccggaaggtatgatgcaaggaaacaacggagtcgagtattacgaccagcaacttcaaggacggtacccaatagattatccgatgatgccacaacaacaaatggccgcaggaactattcatactttccaacctggataccatcaagacgtgttccaaccaattccacaacaaatcccaatcgaccagcacaattttggatacatg…	mysqlssssysspsnsnspptpavpmypdipqpfhqgfanpaqsfdmgmmgyqnnmmmmpnqpfvpegmmqgnngveyydqqlqgrypidypmmpqqqmaagtihtfqpgyhqdvfqpipqqipidqhnfgymdntqvpeppvfyngfenlppapvnnyefitdqpaasrrkytkskvpkvstmhlntacsncgtretklwrrnekgepecnpcnlyerfkgskrpanlwnkptikrkrrapvapvvqddnddme	255
tribulationis	END-3.2		CSP40.scaffold00267	(170503..170743,170796..171237,171284..171395)	CSP40.g7584.t1/exact	atgtaccctcaaccgttctcctcttccacttattcctcttcgttcaatttcaatacttccctcacccctgctacggttgatccgatgtaccaggaaattccacaagcctatgaccagggttacccctacccagctcaacaatcggatttcggattgatgggctatcagaacaacatgattcccaatcagccatttgctccagatggtatgatgcaagtcaacaacggagcgcattttcacgaccagcagttccacaatatggatcaacaagctccaataagctatcagatgatgcaccaacagcaaatgatgggtgctggaactctgcagaactaccaacctggattccaacaggattttttccaaccacttccacaaatgatcccgattaatgagcat…	mypqpfssstysssfnfntsltpatvdpmyqeipqaydqgypypaqqsdfglmgyqnnmipnqpfapdgmmqvnngahfhdqqfhnmdqqapisyqmmhqqqmmgagtlqnyqpgfqqdffqplpqmipinehnfrymgntqdapelyhgfenippaaptdpfkfisaqssdlppfdnfnvptaparkrkspksekknkipvvkvcsncgtdkttmwrtsrkgerecnacnlyedvngekrpehlwnkptikrkrrtpavpvehd	265	paralogous to Csp40END3.1
tribulationis	END-3.3	pseudogene	CSP40.scaffold00267	complement(199035..199389,199441..199705,199759..199999)	CSP40.g7596.t1/partial (they omit the first part up to the next methionine)	atgtactctcaattctcgtcctcttcctattcctcgccttccaattcgaactctcccccaacccctgctgctgtcccaatgtatccagacatcccacaacctttccatcaaggcttcgctaatccaactcagtcatttgacatgggaatgatgggctatccgaacaatatgatgatgatgccaaatcaaccacttgttccggaaggtatgatgcaaggaaacaacggagtcgagtattacgaccagcaacttcaaggacggtacccaatagattacccgataatgccacaacaacaaatggctccaggaactatgtatgattcccaactcgaattccaacaagaagtgttccaaccaattccacagcaaatcccaattgagcaacacaactttggatac…	mysqfssssysspsnsnspptpaavpmypdipqpfhqgfanptqsfdmgmmgypnnmmmmpnqplvpegmmqgnngveyydqqlqgrypidypimpqqqmapgtmydsqlefqqevfqpipqqipieqhnfgymdntqvpeppvffngfenlppapvgrrnekeepecnpcnlyerfkgskrpanlwnkatikrkrrvpaapvvqaandemde	213	44aa deletion, missing part of DBD, strong match to Csp40END3.1
latens	MED-1.1		CLATE.scaffold_8	complement(339746..340327)	CLATE.FL83_04218-RA/partial (they splice to more at front and back)	atggacccactctcttaccctttcccaacattcaatgttgattctactacctattctggccactaccctaacagtgactactggaactgggtcaactattactatcaaaatggattcagccatgatcagccggctacttctggatattcattcatgacttcactatcaacttctacgttgtcagcgccaagtacctcttcaggatctgattcaacactcctctcaatgacgcctccgatgccaacttctacttttacaacaccgaatacttcatcaactttatcttcaactgccactccgtgtccaatgctctcaatgacacatccattctatccgatgttacctacttctacaatgacaccaccaatcaccactgccactccccatcgtccccagggt…	mdplsypfptfnvdsttysghypnsdywnwvnyyyqngfshdqpatsgysfmtslststlsapstssgsdstllsmtppmptstfttpntsstlsstatpcpmlsmthpfypmlptstmtppittatphrpqgplkqcsncfatetcqwrnvrlengiqcnacfiyqrkykktrpvtamekyrskkarrqsksd	194	revised to start at later Met to conserve with MED1.2; best match CeMED1
latens	MED-1.2		CLATE.scaffold_8	complement(349804..350358)		atggaccctttctcttaccctgtaccaacattcaatgttgattctactacctattctggctactaccctaatactgactactggaactgggtcaactattactatcagaatggatttacctatgatcagccggctacttctggatattcattcatgacttcaccatcaacttctacgatgtcaactccaagtagctcttcaggatttgatccaacactcctctcaatgacgcctccgatgccaacttttaattttacaacaccgaatacttcatcaacttcatcttcaactgccactccgtctccaatactctcaatgacacatccattcgttcccatgtcaactacaacatcttccaccactccccatcgtccccaggatcctcccaagcaatgctcc…	mdpfsypvptfnvdsttysgyypntdywnwvnyyyqngftydqpatsgysfmtspststmstpssssgfdptllsmtppmptfnfttpntsstssstatpspilsmthpfvpmstttssttphrpqdppkqcsncfatetcqwrnvrsesgilcnacfiyqrkykktrpvtavekyrnkkaqrei	185
latens	MED-1.3		CLATE.scaffold_8	(336733..337302)	CLATE.FL83_04217-RA/partial (they have two additional amino acids)	atggaccctctctcttaccctgtaccaacattcaatgttgattctactacctattctggctactaccctaatactgactactggaactgggttaactattactatcagaatggattcacctatgatcagtcgatgtcttctggattcacgccatcaacttctacaatgtcaactccaagtagctcttcaggatctgacccaacactcctctcaatgacgcctccgatgtcaacttttacttttacaacaccaaatacttcatcaatttctttttcaactgccactccgtctccaatgctctcaatgacggctccgttctatccaatgacaccaacttctacaatgacaccaataaccaccacagccactccccatcgtccccaggattctaccaaacaa…	mdplsypvptfnvdsttysgyypntdywnwvnyyyqngftydqsmssgftpststmstpssssgsdptllsmtppmstftfttpntssisfstatpspmlsmtapfypmtptstmtpitttatphrpqdstkqcsncfaaetcqwrnvrsengiqcnacfiyqrkykktrpvtamekyrykkahrqsksd	190
latens	MED-1.4		CLATE.scaffold_100	complement(185795..186301)	CLATE.FL83_13367-RA/partial (they have upstream and downstream additions, much longer ORF of 654aa)	atggaccctctctcttatcctttcccaacatataatgttgattattcctctacccctacctattctggctactaccctaatacggactactggaactgggtcaattattattatcaaaatggattaagctatgatcagtcgacgtctcctggatattcattcacgccatcaatttctacgatgtcaactccaagtacgtcctcagaatgtgattcaactgccacttcatctccaatgctctcaatgacacctccattctatccgataccaacttctacaatgacgccaccaaccaccaccaccactcctcatcgttcccagggttctcccaaacaatgttccaactgcttcgccacggaaacatgtcaatggaggaatgttcgatcggagaatggaatt…	mdplsypfptynvdysstptysgyypntdywnwvnyyyqnglsydqstspgysftpsistmstpstssecdstatsspmlsmtppfypiptstmtpptttttphrsqgspkqcsncfatetcqwrnvrsengilcnacfiyqrkykktrpvtavekyrskkvhkqsnsd	169
latens	MED-1.5		CLATE.scaffold_100	(195429..195935)	CLATE.FL83_13371-RA/partial (much larger up and downstream)	atggaccctttctcttatcctttcccaacatataatgttgattattcctctacccctacatattctggctactaccctaatacggattactggaactgggtcaactattactatcaaaatggattcacatatgatcagccgacgtcttctggatattcatttatgacttcaccaccaacttctacgatgtcaactccaagtacgtcctcagaatctgattcaactgccacttcatctccaatgctctcaatgacgccttcattctatccgataccaacttctacaatggcaccaaccaccaccactccccatcgttcccagggttctcccaaacaatgctccaactgcttcgccacggaaacatgtcaatggaggaatgttcgatcggagaacggaatt…	mdpfsypfptynvdysstptysgyypntdywnwvnyyyqngftydqptssgysfmtspptstmstpstssesdstatsspmlsmtpsfypiptstmapttttphrsqgspkqcsncfatetcqwrnvrsengilcnacfiylrkykktrpvtavekyrskkvhrqsnsd	169	2.2 and 2.3 are right next to each other in tandem, joined together in protein prediction CLATE.FL83_13371-RA
latens	MED-1.6		CLATE.scaffold_100	(196729..197289)	CLATE.FL83_13371-RA/partial (much larger up and downstream)	atggaccctttcccaacattcaatattgattattcctctgaccctacctattctgggtattaccttaacagcgactactggaactggggcaactattactatcaaaatggattaacctatgatcagccgacgtcttctggatattcattcaagacttcaccatcaatttctaccatgtcaactccaagtacctcctcagaatctgattcaactgctatttcatctccaattctctcaatgacgccttcattctatccgatgccaactgcaacatcagccataacatctgattccaatgctgctccattgctcacaatgacaccaccaaccaccaccactcctcatcgttcccagggttctcctaaaaaatgttccaactgcttcgccacggaaacatgt…	mdpfptfnidyssdptysgyylnsdywnwgnyyyqngltydqptssgysfktspsistmstpstssesdstaisspilsmtpsfypmptatsaitsdsnaaplltmtppttttphrsqgspkkcsncfatetcqwrnvrsengilcnacfiyqrkykktrpatamekyrskkahqqskkahrqsnsd	187	2.2 and 2.3 are right next to each other in tandem, joined together in protein prediction CLATE.FL83_13371-RA
latens	MED-1.7		CLATE.scaffold_114	(254883..255362)	CLATE.FL83_14826-RA/partial (much larger up and down-joined to pseudogene 3.3)	atggatccactctctttccctctcccaacatttaatgttgattattccgctacacctggctattctggctactacccaaatactgactactggaactgggtcaattactattaccaaaatggattccattatgatcagccgacgtcctctggatattcattcacaccgacttccacaatgccaactccaagtacctcctcaggttctgatttcactgttactccagtattctcaatgacgcctttaatgccaacaataacaccacccaccaccaccacgcctcatcgtcccaaggattcttccaaacaatgttccaactgtttcgcgacggaaacctgtcaatggagaaatgttagatcggcgaatggaattcagtgcaatgcttgttttatttaccaa…	mdplsfplptfnvdysatpgysgyypntdywnwvnyyyqngfhydqptssgysftptstmptpstssgsdftvtpvfsmtplmptitppttttphrpkdsskqcsncfatetcqwrnvrsangiqcnacfiyqrkykktrpvtamekyrrkkahqisnsn	160
latens	MED-1.8	pseudogene	CLATE.scaffold_114	248059..248196 ***HAS NONSENSE AT C#2 and others (pseudogene)	CLATE.FL83_14826-RA/partial (much larger downstream, joined to pseudogene 3.3)	atgacgccttcgatgcagaaatcacgtcgccaaccatctcccatgctctccatgataccttccaactatccgatgcaaactctcacaatgacgtcaccaaccaccaccacggccatcgtcgattctcccaaacaatgctccaactgattcgccacagaaacatgtcaatggaggaatgttcgattggagaatggaatccagtgcaatgcttgttttatctaccagagaaagtatgaaaaacctcgctcaggaaccgcagtagagagattttga	mtpsmqksrrqpspmlsmipsnypmqtltmtspttttaivdspkqcsn*fatetcqwrnvrlengiqcnacfiyqrkyekprsgtaverf	90	pseudogene, nonsense at #2C
latens	MED-1.9	pseudogene	CLATE.scaffold_114	252106..252216, 252059..252118 *** has frame shift, loss of #3C, nonsense in FATETCQ*RNVRKME - pseudogene		atggattctctctcttaccctttccccgcatcaaatgttgattatcccgctacttctgacatttctggttaccaccctaacacagaatactggaattgggtcaacttctattatcgaaatgggttccactatgatcagccgtcgtattctggattcacaccaacttccacgacgccaactccaagtacctcatctggatcttatttcactgctactccagtattctcagcgacgccttcgatgctaacaatgacaccacccatcaccaccacgcctcatcgtcccaaggattcttccaaacaatgctcaaactgtttcgcgacggaaacatgtcaatagagaaatgttcggaaaatggaattcagtggaatgcttgttttatttaccagaggaaatata…	mdslsypfpasnvdypatsdisgyhpnteywnwvnfyyrngfhydqpsysgftptsttptpstssgsyftatpvfsatpsmltmtppitttphrpkdsskqcsncfatetcq	112	pseudogene - fs, stop, missense in #3C
latens	MED-1.10		CLATE.scaffold_127	complement(133832..134299)	CLATE.FL83_15321-RA/exact	atggatcctctctctttccctctcccaacattcaatgttgattattccgctacacctgactattctggctactacccaaacacagactactggaactgggtcaattactattaccaaaatggattcaactacaatcagccgacgtccactggatattcattcacaccaacttccacgatgccaactccaagtacctcctcaagatctgattccgctgctactccagtattctcaatgacaacaatgacgccaccaaccaccaccacgcctcatcgtcctaaggaatctcccaaacaatgctccaactgtttcgtcacagaaacctgtcaatggagaaatgttcgatccgaaaatggaatcgagtgcaatgcttgttttatttaccagaggaagtataag…	mdplsfplptfnvdysatpdysgyypntdywnwvnyyyqngfnynqptstgysftptstmptpstssrsdsaatpvfsmttmtppttttphrpkespkqcsncfvtetcqwrnvrsengiecnacfiyqrkykktrpvsamekyrsktthrqnnsd	156
latens	MED-1.11	pseudogene	CLATE.scaffold_127	132807..132715 temp	CLATE.FL83_15320-RA/partial (extends after #4C)	atgttctccataataccttcttactatcctatatcaactcctgcaataaaacttccaatcactccaatttctcaccgttccaaggattctactagaaactgctccaactgcttcacaacggaaacatgtcaatggaggaatgttcgatcggggaaaagaattatgtgcaatgcttgtttatttatcgaaagaaatatttttataaaactctgtatgtttttgtttctgttgcacttctag	mfsiipsyypistpaiklpitpishrskdstrncsncfttetcqwrnvrsgkrimcnaclfiernifiklcmflfllhf	79	divergent, still best match to MED1, partial MED - seems likely pseudogene as well, no good ATG or introns upstream
latens	MED-1.12		CLATE.scaffold_44	(193674..194189)	CLATE.FL83_09064-RA/exact	atgaataaccaatcgaagcaacaaaatgaaaatgccctcaattccttgaatccacagtatctgaacgggtttattcatggagctgagatgatgaagacgtatttggaaatgatgtcgtcggtgaggactccactggttcagactccattagttccaccggccggattcccttattctatgacatcaacagcttctcagtcaccggtcgccagtgtcaatttcttcaccaattccgccaccagttcttctgttgatcaatcgaaaagccccgtgccaatcgataattcggattgcaaactattgccgtctagccccaaggaaatgggctccagctcccctcgaacaacaaaactgaagtcgtgctctcactgcaaagccaccgaatcctgttgctggaga…	mnnqskqqnenalnslnpqylngfihgaemmktylemmssvrtplvqtplvppagfpysmtstasqspvasvnfftnsatsssvdqskspvpidnsdckllpsspkemgsssprttklkscshckatesccwrkvrsdtgmmcnacfiyerkykksrplsaiksynamkehn	172
latens	MED-1.13		CLATE.scaffold_44	complement(161477..161980)	CLATE.FL83_09054-RA/exact	atgaataaccaatcgaagcaacaaaatgaaaatgccctcaattccttgaatccacattatttgaacgggtttattcatggagctgagatgatgaagacgtatttggaaatgatgtcgtcggtgtgggctccacagcttcagactccattagccccaacggccggattcccgtattctatggcatcaacaacttctcagtcaccggccgccagtgtcgatttattcaccaattcttctgctgatcaatcgaaaagccccgtgccaatcgataattcgaatagaaaacgattgccgtctagcccccaggaaatgtgctccagctcccctcggacaacaaaattgaagtcgtgttctcactgcaaagccaccgaatcatgttgctggagaaaagttcgatcg…	mnnqskqqnenalnslnphylngfihgaemmktylemmssvwapqlqtplaptagfpysmasttsqspaasvdlftnssadqskspvpidnsnrkrlpsspqemcsssprttklkscshckatesccwrkvrsdtgmmcnacfiyerkykksrplsaiksynamkehn	168
latens	END-1		CLATE.scaffold_6	complement(339425..339602,339649..339749,339907..340100,340144..340378)	CLATE.FL83_03693-RA/exact	atgtatccgctatcatcgtcatcctcttcttcatcgtcatcccctccatctaacactcataatacttcatatgcatatggaattgtggataaagatggaaatattcattctcatgaaatgcatttttcacatgatcacggaaatccatctccagttcacactcctcaaatgtatgatccaattgcaacaccatttctcatggatccacattttgaggatttcggacaatatttcgttccatcgtatgttccacctcttcaacaacttcctccagtcaattctgtttttggaagctttgatatttcaatgaataatattgtcaacaatgagcaatatccacaatatccggaaattggaatgaactatgttcaggagcaagagcaggagaatgtgtcaccg…	myplssssssssssppsnthntsyaygivdkdgnihshemhfshdhgnpspvhtpqmydpiatpflmdphfedfgqyfvpsyvpplqqlppvnsvfgsfdismnnivnneqypqypeigmnyvqeqeqenvspaprknsggrkpsafhhnsvcsnpncgtrqttlwrrtdsgaiecngcslyfrkngvqrpadlcnkvimkrnrrprvetqlsrgdsnlqeqstqqlqnienvqll	236
latens	END-3		CLATE.scaffold_6	complement(307661..307790,307839..308058,308108..308281,308335..308584)	CLATE.FL83_03682-RA/exact	atgtactctcattcgttctcgtcttcatccttttcttcttcttctactaattccaattctcctccatctactcaaatgtttggagctgataactcaatggttcaagtctatgaccaaggttacggtactcctgctccacagtcagacatgtcgatggttcctccaatgaattatcatcattttcctcaagatatgatgacaaatcaaccgttccctatggctccagttaacaatggaatgatgttttatggtcaagatcaacagcagtttccacctatgcaatatcagatgcaaccaatggccgatcaaggaattccacaggagttccagcagaactatcaacaagatatgtttcaacaagttccagatcagttgcaagtcatgaaccaggactttaat…	myshsfssssfsssstnsnsppstqmfgadnsmvqvydqgygtpapqsdmsmvppmnyhhfpqdmmtnqpfpmapvnngmmfygqdqqqfppmqyqmqpmadqgipqefqqnyqqdmfqqvpdqlqvmnqdfnfmvnnevlddannaydfnkvaeqqqnenfnfgevpahaprrrcskkkekkvstmhlntscsncgtretklwrrnergepecnpcnlyerfkgekrpqhlwnkptikrrrrpvapianevndevgn	258
inopinata	MED-1.1		CSP34.Sp34_Chr3	complement(15459671..15460243)	CSP34.Sp34_30267600.t1/exact	atgaattaccaatacgatccgtcctttttcaacgctgactacgcgtgtgatcctagtttatccaacttgaatcctacggtacctgacccatattctaattatcaagtcagcaacccgtatgactctaataatgccaaatcgtacagtattcccaacccttgctctactgattattcgtattctgccaactacggtactactggtaactacgttgctccacccttttatcaaactccattcaattggactatggaccaaacgtcctttactaatcctaattatacaccaacagattcaggttccatgtgctcgacaccatcgtcgagctgcccttcaacatcgtcccctcagaatgtgtgcatcagcactccggcagtcagcagtcagaagtatcgcatg…	mnyqydpsffnadyacdpslsnlnptvpdpysnyqvsnpydsnnaksysipnpcstdysysanygttgnyvappfyqtpfnwtmdqtsftnpnytptdsgsmcstpssscpstsspqnvcistpavssqkyrmcsncavtesrpwrnvrskdgplcnacfiykrkynktrpasavhnykmrdqskkslkkm	191
inopinata	MED-1.2		CSP34.Sp34_Chr3	(15467155..15467727)	CSP34.Sp34_30267900.t1/exact	atgaattaccaatacgatccgtcctttttcaacgctgactacgcgtgtgatcctagtttttccaacttgaatcctacggtacctgacccatattctaattatcaagtcagcaacccgtatgactctaataataccaacgcgtacagtattccaaacccttgctctactgattattcgtattctgccgactacggtactactggtaactacgttgctccacccttttatcaaactccattcaattggactatggacccaacgtcctttactaatcctaattatacaccaacagattcaggttccatgtgctcgacaccatcgtcgagctgcccttcaacatcgtcccctcagaatgtgtgcatcagcactccggcagccagcagtcagaagtatcgcatg…	mnyqydpsffnadyacdpsfsnlnptvpdpysnyqvsnpydsnntnaysipnpcstdysysadygttgnyvappfyqtpfnwtmdptsftnpnytptdsgsmcstpssscpstsspqnvcistpaassqkyrmcsncavtesrpwrnvrskdgplcnacfiykrkynrtrpasavhnykmrdqskkslkki	191
inopinata	END-1		CSP34.Sp34_Chr5	(5404925..5405147,5405197..5405363,5405412..5405512,5405782..5405956)	CSP34.Sp34_50097700.t1/exact	atgtttccatcgtcgtcttcatctacttccagcccatccgcaatccaaagcgttccatacacgtatggagtcattgataaagatggaaaagtgcatccgcacgagatgcgttttccagataatcgggaaaatccggcttctctcaattctcaacaaatgtttcaatatgctccggtacaatatgcgcctgatcactactatgatgattttgggcagtattttgttcaaccatgcattccccctcaaccaacccctccagtacatcccgtgttcggaagtttagatgcggtgagctgctacagtgaatatctaccattcgggcacagctatcaacaagatcaagagaatattcccgtgacgtcatgcacccggaaaagtattgtcaaaaagccctccact…	mfpssssstsspsaiqsvpytygvidkdgkvhphemrfpdnrenpaslnsqqmfqyapvqyapdhyyddfgqyfvqpcippqptppvhpvfgsldavscyseylpfghsyqqdqenipvtsctrksivkkpstfhinsvcsnpncrtrettlwrrtdsgavecngcslyfrkngvqrptelcrktimkrnrrpraevtspdysiinqqsmsqknvlksdhfs	222
inopinata	END-3.1		CSP34.Sp34_Chr5	(5449092..5449353,5449404..5449698,5449777..5449900)	CSP34.Sp34_50098400.t1/exact	atgtattctaattcatactcttctacatcctgttcctcttctcattcttctttcggatctgctgaaatgcagtcggggttcactcagaaagctttcaacaatgaaggttatgaagtccaagccgtacccatgcctttagctgtgaataaccatatgaactatcattcttttccgcaagaaggtcatgtaatgatggatcatagccaagtttttggcattgcaaatgaagcaatgcaagaaaatacagtgcgaattcaaagtggacctacgtatcaacaccttcagcctatcggcttctctgaccagcaatttcatcaatttcctgcaaataattacagcttgaacgggtacaatggggtgatggtgccaaaccaccaaccctgcgttatcggagagttt…	mysnsysstscssshssfgsaemqsgftqkafnnegyevqavpmplavnnhmnyhsfpqeghvmmdhsqvfgianeamqentvriqsgptyqhlqpigfsdqqfhqfpannyslngyngvmvpnhqpcvigefkligsmetrppkrsskkgvkkvstmhqnsicancgcretkmwrrnekgepecnpcnlyerlkghkrperlwnkppsmrrrrpvapinnnaisey	227
inopinata	END-3.2		CSP34.Sp34_Chr5	complement(4532514..4532637,4532718..4533012,4533063..4533327)		atgtatcccaattcatattcatctacatcctccaactcttcttctgattctcttttcggatcctctgaaatgcagtttgggctcactcagaaagcattcaacaatgaaggttatgaagtgcaagccgtacccatgcctttagctgtgaataaccatatgaactatcattcttttcaacaagaaggtcatgtaatcatggatcatagccaagtttttggcattgcaaatgaagcaatgcgagaaaataccgcgaatattccaattggaccaaattatcaacaccttcagcccatcggctttcctgaccagcattttcatcaatttcctgcaaataattacagcttcagcgggtacaatggggtgatggacgcagacaaagaaccctgcgctatcgacgag…	mypnsysstssnsssdslfgssemqfgltqkafnnegyevqavpmplavnnhmnyhsfqqeghvimdhsqvfgianeamrentanipigpnyqhlqpigfpdqhfhqfpannysfsgyngvmdadkepcaidefklmgsmenrppkrssknkvkkvstmhqnsncancgcretklwrrnekgepecnpcnlyerlkghkrperlwnkppsmrrrrpvapinnnaisdn	228
brenneri	MED-1.1		Cbre_Contig662	complement(23507..24010)		atggattcccgccaatcactctcgccagtattcgatgcaaactacatcttcgactcaccatcgactgtctccacgtggaatccaaacaacttcaacactttctatccaacttaccctactcaccctacttaccgctacaatggcaactatttatgcttggattatatcaatcaatgcaagcagtttacacttgattcatctactaactcagctccttctccgagttcatcctcaacgtcttcttcggcaagtccatcagaatccacaaaatccgacggattgagagatttgaaaccgaaaatctcgcggatcacttataccactcgaaaatgctcgaattgtgggtcagatgagagttgtaaatggagaaatatcacatcgagagacggaatattgtgc…	mdsrqslspvfdanyifdspstvstwnpnnfntfyptypthptyryngnylcldyinqckqftldsstnsapspsssstsssaspsestksdglrdlkpkisrityttrkcsncgsdesckwrnitsrdgilcnacfiyrrkykknrptvvaeayqarrkikmqqeke	168
brenneri	MED-1.2		Cbre_Contig98	(354740..355237)		atggattcccgccaatcactctcgccagtattcgatgcaaactacatcttcgactcaccatcgactgtctctacatggaattcaaataactttaacactttctatccaacttaccctactcatcctacttaccgatacaataacaactatttatgcttggattatatcaatcaatgcaagcagtttacacttgattcatctactaactcatctccttctccgagttcatcctcaacgtcttctccgacaagtccatccacagaatccgacgaattgaaagatttgaatccgaaaatctcgcggatcagttgtaccactcgaaaatgctcgaattgtgggtcagatgagagttgtaaatggagaaatatcacatcgagagacggaatattgtgcaatgcg…	mdsrqslspvfdanyifdspstvstwnsnnfntfyptypthptyrynnnylcldyinqckqftldsstnsspspsssstssptspstesdelkdlnpkisriscttrkcsncgsdesckwrnitsrdgilcnacfiyrrkykktrptvvaeaykarrkikmqqeke	166
brenneri	MED-1.3		Cbre_Contig118	complement(221494..221997)		atggattcccgccaatcactctcgccagtattcgatgcaaactacatcttcgactcaccatcgactgtctccacgtggaatccaaacaacttcaacactttctatccaacttaccctactcaccctacttaccgctacaatggcaactatttatgcttggattatatcaatcaatgcaagcagtttacacttgattcatctactaactcagctccttctccgagttcatcctcaacgtcttcttcggcaagtccatcagaatccacaaaatccgacggattgagagatttgaaaccgaaaatctcgcggatcacttataccactcgaaaatgctcgaattgtgggtcagatgagagttgtaaatggagaaatatcacatcgagagacggaatattgtgc…	mdsrqslspvfdanyifdspstvstwnpnnfntfyptypthptyryngnylcldyinqckqftldsstnsapspsssstsssaspsestksdglrdlkpkisrityttrkcsncgsdesckwrnitsrdgilcnacfiyrrkykknrptvvaeayqarrkikmqqeke	168	possible allele of Cbrenneri_MED1.1 above
brenneri	MED-1.4		Cbre_Contig170	complement(416989..417483)		atggattcccgccaatcactctcgccagtattcgatgcaaactacatcttcgactcaccatcgactgtctccacgtggaatccgaacaactttaacactttctatccaacttaccctacttaccgatacaataacaactatttatgcttggattatatcaatcaatgcaagcagtttacacttgattcatttactaactcatctccttctctgagttcatcctcaacgtcttctccggcaagtccatcagaatccacgaagtccgacgaattgaaagatttgaaaccgaaaatctcgcggatcagttgtatcactcgaaaatgctcgaattgtgggtcagatgagagttgtaaatggagaaatatcacatcgagagacggaatattgtgcaatgcgtgc…	mdsrqslspvfdanyifdspstvstwnpnnfntfyptyptyrynnnylcldyinqckqftldsftnsspslsssstsspaspsestksdelkdlkpkisriscitrkcsncgsdesckwrnitsrdgilcnacfiyrrkykknrptvvaeaykarrkikmqqeke	165
brenneri	MED-1.5		Cbre_Contig101	complement(337787..338072)	CBN13321/partial (they have more upstream; I truncated somewhat arbitrarily)	atgacgaactacggaaagggtcttggtcagatgcaagtacttccattgcataacttcgacggaagaaccttgaaaatggtcttcaattggtgtgagaattatacggaggatccaacaattactggtgacaatctcgcgacaagtttgacagcctcggagttcgaaaagaagtttttggatgggaaagatgtttcacaagctttcaacgtggccagtgccgctctatacctggacatcgaatctttggtccgtttcgctagtgacaaaattgctggaattttggatggaaatgagaccaaagatcttccacatacaacttcaggagctcagccaacgtctactccaatccaatccactccagttcaattcgctccaatgccgcctacaccaatgccattc…	mtnygkglgqmqvlplhnfdgrtlkmvfnwcenytedptitgdnlatsltasefekkfldgkdvsqafnvasaalyldieslvrfasdkiagildgnetkdlphttsgaqptstpiqstpvqfapmpptpmpfqsnslstptiksshtcshcgvqqsckwrnilspqilcnacyiyqrkynkvrpataaasykrrmaektid	202	divergent in its upstream region, has an intron, dubious - possible gene fragment?
brenneri	MED-1.6		Cbre_Contig16	complement(142956..143561)	CBN21224/exact	atgctcaacaattctgctcctgctcccgagatgtactacagaatcgtgtcaagcgaccaaagagagctccgcgtttccgagagagctcttcaacaatccaaaatcctgggcactcttatatcaatcctgggatactcttcggaggatattgagagcaatccagccattccactcacgaacatcgatgggaacactctggaattggtcttcaaatggtgtgaagaacacaaatcggacagtgccacgggaaaggatttcgacgagaagtttatgaatgagatggacgacacaaaacgtttctatgtgatctgtgctgcttattatttgggtatcgaaaatctggtggctctggtttggaagagctcggctgacaggatcaatgctccagtcaaagttgat…	mlnnsapapemyyrivssdqrelrvseralqqskilgtlisilgyssediesnpaipltnidgntlelvfkwceehksdsatgkdfdekfmnemddtkrfyvicaayylgienlvalvwkssadrinapvkvdptpvetqlqtttisrkcsrcgstetckwrqcrspnilcnacfiyhrkfnkdrpesasvayefrkmkkth	202	the putative 5' ends of the scaffold16 paralogs could be chosen farther in, increasing 5' end homology.
brenneri	MED-1.7		Cbre_Contig16	complement(143992..144562)	CBN00230/partial (they have longer 5' end)	atgctgcctactactacctcgttcacagtcgatatgccctattgggatccatcttggattccaatgccatatccactcccattacctattcctactgtaactattactacagtaactactaatcctcttccgtttttgaacccggaagcgtttctgggtctgccctccaattccaactttcttccaactaattttccaactactactactggatcattgccgttgcctactttgatgcctgcttctccatctcctccagcaatcaatgcacatgcaaaggatggctcaatcaactattattctccaaactattctcaaccgacgctgccacatattcctgctccacctgtggctcttcctccatgtgctcctcccgctccatctactccaactacggct…	mlptttsftvdmpywdpswipmpyplplpiptvtittvttnplpflnpeaflglpsnsnflptnfpttttgslplptlmpaspsppainahakdgsinyyspnysqptlphipappvalppcappapstpttaaprkcgncgttesciwrnvkskesirchkcygyrqrtkkerpaavikanrvikmkri	190	the putative 5' ends of the scaffold16 paralogs could be chosen farther in, increasing 5' end homology.
brenneri	MED-1.8		Cbre_Contig16	complement(148488..149072)	CBN07357/exact	atgctcaacaattctgctcctgctcccgagatgtactacagaatcgtgtcaagcgaccaaagagagctccgcgtttccgagagagctcttcaacaatccaaaatcctgggcactcttatatcaatcctgggatacactttggaggatgttgagagaaattcagccattccactcacgaacctcgatgggaacactctggaattggtcttcaaatggtgtgaagaacacaaatcggacagtgccacgggaaaggatttcgacgagaagtttatgaatgagatggacgacacaaaacgtttctatgtgatctgtgctgcttattacttgggtatcgaaaatctggtggctctggtttggaagagctcggctgacaggatcaatgctccagtcaaagttgat…	mlnnsapapemyyrivssdqrelrvseralqqskilgtlisilgytledvernsaipltnldgntlelvfkwceehksdsatgkdfdekfmnemddtkrfyvicaayylgienlvalvwkssadrinapvkvdptpttisrkcsrcgstetckwrqcrspnilcnacfiyhrkfnkdrpesasvayefrkmkkth	195
brenneri	MED-1.9		Cbre_Contig16	complement(149500..150210)		atgttatctgatggtataccttcaatctgctcatctgcccagctgcaagtatacctttaccctgctggaatctgcgggggcggagcttgtgaagggtatataaggctggtggtctggactagaatccactcattcagtcatctcgctctgaccataatgatgcctaccactaccccattcccagtcactatgccgtattgggatccatctactaatacttggattccaatgccatatccactcccatcacctattcctactgttacattcactactataactactattcctcttccgtttttgaacccgcagtctcttctgaatctgccttcccctttgatgattgctgctcctgctccatctcttccaacaatcaatgcacatgcaaacgatggctca…	mlsdgipsicssaqlqvylypagicgggacegyirlvvwtrihsfshlaltimmptttpfpvtmpywdpstntwipmpyplpspiptvtfttittiplpflnpqsllnlpsplmiaapapslptinahandgsinyytpnnipgyaptntptyfstdavpappvalppsappapstptatvplkcgncgttkpcqwnnvkskdnirchtcycyrlrtkmerpasliktnqlnkmkrd	237
brenneri	MED-1.10		Cbre_Contig16	complement(152936..153505)		atgctgcctactactaacccattcccagtcgatatgccctattgggatccaacttggattccaatgccgtatccactcccagtacctattcctactgtaactatcactactatgactactattcctcttccgtttttgaacccgcagccgcttctgaatctaccctccaatttcaacatccttccaactaatattccaacaactactactactggatcttcaccgtttcctttgatgcctgctgctcctgctccatttcctccttcaatcaatgcccatgcaaaggatggctcaatcaactattatactccaaactattctcaacaaatgccgtctactgttcctgctccaccattggctcttcctgctcttccagctccatctactctaactgtggct…	mlpttnpfpvdmpywdptwipmpyplpvpiptvtittmttiplpflnpqpllnlpsnfnilptniptttttgsspfplmpaapapfppsinahakdgsinyytpnysqqmpstvpapplalpalpapstltvaaprkcgncgttetyrwrsvtskesircftcyeyrrttkkerpaavikanqlkkmkri	190
brenneri	MED-1.11		Cbre_Contig16	complement(155806..156375)		atgctgcctactactaccccattcccagtcactatggactactcccaatggcactgggacccttccactttcacttggctccctagtgctcctcctactagtccctactatttggattcagtgtattcctataacacatccacttttcccaattattcctaccctactgcgaccaacgactatactttggacccgtattctcataagaatcaggcatcctatgatagctacatcaactattattttcataactatattcctggctatactccatctaatactccaacctattctcaaccaatactgcctcctgctcctgctccacttgtggtccctgctcaatgtgctcctccagctccatctcttccagcaatcaaaccaaaggcaaaagtggctcgt…	mlptttpfpvtmdysqwhwdpstftwlpsapptspyyldsvysyntstfpnysyptatndytldpyshknqasydsyinyyfhnyipgytpsntptysqpilppapaplvvpaqcappapslpaikpkakvarkcgncgttescfwknvnskdnircntcfryrqrnkkersadviqasqemkmmktkrq	190
brenneri	MED-1.12		Cbre_Contig16	complement(164670..165284)		atgctgcctactactaccccattcccagtcgatatgccctattgggatccattcactaatacttggattccaatgccacatccactcccatcacctattcctactgttacattcactactatgaatactattcctcttccatttttaagcccggaatcgcttctaggtctgccctccaattttaacttccccccaactgatattctaactactacagctagatctacaccgtcgccttctttgatgcatgctgctcctgctccatctcctccaacaatcaatgcagatggctcaatcaactattattctccaaactatgttcctggctatgctccattcaatactccaaattattctccaccgatgccgtctcctgttccttctccacctgtggctctt…	mlptttpfpvdmpywdpftntwipmphplpspiptvtfttmntiplpflspesllglpsnfnfpptdiltttarstpspslmhaapapspptinadgsinyyspnyvpgyapfntpnysppmpspvpsppvalaprarpapstskkaaprrkcsncgttesckwknvkskdnircntcfiyrrrnnkdrpaaaikynqeikmkki	205
brenneri	MED-1.13		Cbre_Contig16	complement(165895..166899)		atggtataccttccaatctgtccatctaaccagctgcaagtatacctttaccctgctcgaatctgtgggggcggagcttgtggagagtatataagactggttgtctggactagaatccactcattcagccctctcgctctgaccataatgctgccttctactaccccattcaaagtcgatatgctctattgggatccatccactaatacttggatcccaatgccatatccactcccattacctattcctactgttacattcactactataaatactattcctcttccctttttgaatccggagttgcttctgaatctgccctccaatttcaacttccccccaactgatattcaaaatactactactggatcaatgccgtctcctcatttgatgcctgct…	mvylpicpsnqlqvylyparicgggacgeyirlvvwtrihsfsplaltimlpsttpfkvdmlywdpstntwipmpyplplpiptvtfttintiplpflnpelllnlpsnfnfpptdiqntttgsmpsphlmpaapalsppainadgsinnyspnyvsgyapsntpnypppmpstipapplalapcappapatltpavprkcgncgttesckwrnvtsknnircntcfryrqrnkkerpadviqtnsnycqpmpstvpapplalaprarpapstpkaatrsrkcsncgttesckwknvrskdniqcntcfiyrqrnnkdrpaaaikfneeikmkri	335	2 fingers
brenneri	MED-1.14		Cbre_Contig16	complement(168938..169531)		atgaggctggtgatctggactagaatccactcattcagtcatctcgctctgaccatgatgatgcctactactactaccccattcccagtcactatggactactcccaatggtattgggatccttccactttcacttggcttccgagtgcccctcctaccagtccctactattcggatccatgttattcctataacacatccacttctcccaattattcctatcctactgcggccactgaatatactttgagcccgtattcccatatgaatcaggcgtcttatgatggctacatcaactattattctccaaactatattcctggctatgctccatctaatactccaacatattctcaaccaatgctgtctcctgctcctgctccacctgtggcttctcca…	mrlviwtrihsfshlaltmmmpttttpfpvtmdysqwywdpstftwlpsapptspyysdpcysyntstspnysyptaateytlspyshmnqasydgyinyyspnyipgyapsntptysqpmlspapappvaspapaiptpavprkcsncgttesckwknvkskdniqcntcfiyrrrnnkdrpaaaikfnqeikmkri	198
brenneri	MED-1.15		Cbre_Contig16	(192345..193079)	CBN10845/partial (theirs starts at a later internal ATG)	atgttatctgatggtataccttcaatctgctcatctaaccagctgcaagtatacctttaccctgctagaatctgtaggggcggagcttgtgtagggtatataaggctggtggtctggactagaatccactcattcagtcatctcgctctgaccataatgttccctgccactaccccattcccagtcaccatggactattcccaatggcattgggatctttccacgttcacttggcttccgagtgtccctcctactagtccctactattcggatccagtgtattcctatgatacatgcactcctactactacttattccttaccttctgaggccactggatataatctggatccatattcatattcagcgcaagcttcttatgatagctacctcaactat…	mlsdgipsicssnqlqvylyparicrggacvgyirlvvwtrihsfshlaltimfpattpfpvtmdysqwhwdlstftwlpsvpptspyysdpvysydtctptttyslpseatgynldpysysaqasydsylnyyppnyipgyaptntptysqpvmssalappaapvaassvappqcappapstpnataprkcgncgttesckwrnvrskdnircntcydyrrrtkkersadviqnyqwmkmvksq	245
brenneri	MED-1.16		Cbre_Contig16	(196269..196874)	CBN12291/partial (theirs omits first part, starts later internal ATG)	atgctgcctaccactaccccattcccagtcgataagccctattgggatccatcttggattccaatgccgtatccacagccattacctattcctactgttacattcactactattaacactattcctcttccatttttgaacccggagtcgcttctgaatctgccctccaatttcaacttccttccaactgatattctaactgctactactggatcttttcctgcgccttctttgatgcatgctgctcctgctccatctcctccaacaatcaatgcagatggctcaatcaatatttattctccaaactatgttcctggctatgctccaactaatacttccgcctattctccaccgatgctgtctcctgctcctgctccacctctggctcctgctccatgt…	mlptttpfpvdkpywdpswipmpypqplpiptvtfttintiplpflnpesllnlpsnfnflptdiltattgsfpapslmhaapapspptinadgsiniyspnyvpgyaptntsaysppmlspapapplapapcappapstpnaaaprrkcgncgttesckwrnvtskinircntcftyrqrnnkdrpaaaiqynqeikmkri	202
brenneri	MED-1.17	pseudogene	Cbre_Contig16	(203150..203668)		tacttggattccaatgccatatccactcccattacctattcctactgttactattacaactatcactactatccctattccatttttgaacccggagatgcttctgaatctgccttccaattctatgtactatccgacaagtactggatcttcaccgtctcttctgatgactgctgttcctgctccatctcctccagcaatcaatgcacatgcaaaagatggttcaatcaactattattcttcaaactatgttcctggctatgctccatccaatactccaacctattctcaaccgatgatggctcctgctcttgctccacctgtggctcttcctccatgtgctcctccagctcaatctactccaactgcgactgtcctcgtaaatgcggtaattgtgat…	yldsnaistpitysycyyynyhyypysifepgdasesafqfyvlsdkywiftvssddccscsisssnqctckrwfnqllffklcswlcsiqysnlfstddgscscstcgsssmcssssiysncdcprkcgncdttqscqwinikskdnirckkcynyrrinkkerpvalikfk	173	fragment of a gene, no clear start
brenneri	MED-1.18		Cbre_Contig104	62879..63046		atggattcccgccaatcactctcgccagtattcgatgcaaactacatcttcgactcaccatcgactgtctccacgtggaatccgaacaacttcaacactttctatccaacttaccctactcaccctacttaccgctacaatgacaactatttatgcttggattatatcaatcaatgcaagcagtttacacttgattcatctactaactcatctccttctccgagttcatcctcaacttcttctccggcaaatccatcagaatccacagaatccgacgaattgaaagatttgaaaccgaaaatcttgcggatcagttgtaccactcgaaaatgctcgaattgtgggtcagatgagagttgtgaatggagaaatatcacatcgaaagacggaatattgtgc…	mdsrqslspvfdanyifdspstvstwnpnnfntfyptypthptyryndnylcldyinqckqftldsstnsspspsssstsspanpsestesdelkdlkpkilriscttrkcsncgsdescewrnitskdgilcnacfiyrrkykknrstvvaetykarrkikkqqeke	168
brenneri	MED-1.19	pseudogene	Cbre_Contig76	complement(168543..168902)		tatttatgcttggattatatcaatcaatgcaagcagtttacacttgattcatctactaactcatctccttctccgagttcatcctcaacgtcttctccggcaagtctatcagaatccacagaatccgacgaattgagagatttgaaaccggaaatcgcgtggatcagttgtaccactcgaaaatgctcgaattgtggatcagatgagagttgtaaatggtgaaatatcacatcgaaagacggaatattgtgcaatgtgtgcttcatgtaccgaagaaaatacaagaagaatcgtctgacggttgtcgctgaggcctataaggctcgtcgcaagataaaaatgcaacaagaaaaagatttataa	ylcldyinqckqftldsstnsspspsssstsspaslsestesdelrdlkpeiawiscttrkcsncgsdesckw*nitskdgilcnvcfmyrrkykknrltvvaeaykarrkikmqqekdl	120	has a stop in the zinc finger
brenneri	MED-1.20		Cbre_Contig123	complement(257958..258488)	CBN17147/exact	atggactctgttcctggaccatcttcccctcaatattgggttctacccactccatatggctgggatgctaacttatctccaactactccttactcctactatccctattctattcctcctactgattattcctcggatgttcaagcatacgatcctactatgtattctccaaattctggctctatgaactttaatcctatccaggatcaaactttgtataaccactatgactactattctgcgactgttcaatccggatcttcttcagtactgccaacaccatctacgacgccacccactattgctccagccaagccgacagcaataacaatcccgaaagtcaaatcaattgcagcaaagaaccggaaatgctccaactgtttcacaaccagtagctgc…	mdsvpgpsspqywvlptpygwdanlspttpysyypysipptdyssdvqaydptmyspnsgsmnfnpiqdqtlynhydyysatvqsgsssvlptpsttpptiapakptaitipkvksiaaknrkcsncfttsscrwknvrsksnilcntcfiykqrngedrpakaiiahqtmqmhlnk	177
brenneri	MED-1.21		Cbre_Contig123	(260853..261203)		atgaactataatcctatccaggatcaaactttctatagccacttcgactactattctgtcactaatccatctggatctctgtctgttctgccaacaccgtctaccacgccacccactcctattgctccagccatgacgacatcaacaagaatcccgaaagccaaaccaactgcagcaaagaaccggaaatgctcaaactgtttcacaaccagtagctgcagatggaaaaacgtcatatcgaaatcgaatatcctttgcaacacctgcttcatctataaacaacggaatggagaggatcgacctgccaaagcaatcattgctcatcagacgatgcaaatgcacttgaataaatga	mnynpiqdqtfyshfdyysvtnpsgslsvlptpsttpptpiapamttstripkakptaaknrkcsncfttsscrwknvisksnilcntcfiykqrngedrpakaiiahqtmqmhlnk	117	unusually small
brenneri	MED-1.22		Cbre_Contig30	complement(53219..53821)		atgagcaagagtaggactcactcatttagtcatctctatctgacttctatgaatccagctaacttgttccctgccaccatggaatcagttcctggaccctctagccctcaatactgggatccaactactccatatggctgggatgctaattcatctccaactactccctattcctacttaccctcttattcaactgactattcaacggatcttcaaacatacgatcctactttgtattcttcaactgctgtctatatgaacttcaatcctacccagcatcaaagtttctataatcaccattctacctactatcctgcgactatcccatctggatcttcttctggctcttcaactccatctaccacaccacctactcttactgcttcagccaagccgact…	msksrthsfshlyltsmnpanlfpatmesvpgpsspqywdpttpygwdansspttpysylpsystdystdlqtydptlysstavymnfnptqhqsfynhhstyypatipsgsssgsstpsttpptltasakptstkipkvkptptrtcsncfttnsckwknvksksnilcntcfiykrrngedrpakaiiahqtmqmhlnk	201
brenneri	MED-1.23		Cbre_Contig30	(55084..55638)	CBN20682/partial (I have 10 more aa at start)	atgaatccagctaactcgtcccctgccaccatggactctgttcctggaccctctagccctcaatactgggatccatctattccatatggctgggatgctaatttatctccaactaccccctattcctacttaccctattattcaactgactattcaacggatcttcaagcatacgatcctactatgtattcttcgacttctggctatatgaacttcaatcctacccaggatcaaaatttctgtaaccactatgctacctactatcctgcggctatcccatctggatcttcttctggctcttcaactccatctaccacaccacctactcttactgcttcagccaagccgacttcgacaaagattacaaaggtcaaaccaacccccacccggacatgttcc…	mnpansspatmdsvpgpsspqywdpsipygwdanlspttpysylpyystdystdlqaydptmysstsgymnfnptqdqnfcnhyatyypaaipsgsssgsstpsttpptltasakptstkitkvkptptrtcsncfttnsckwkdvksksnilcntcfiykrrngedrpakaitahqtmqmhlnk	185
brenneri	MED-1.24		Cbre_Contig4	(1257372..1258130)		atgtgggcgtggcttctgggactaggggtatataaggctggtgagctagagaggaatccagtcattctgacatcagcaatgttccctactatcccattctcagccaccatagacttttccactggctcagcttactattggaacccatccacctattcttgggttccaaatccattccaaactaccccctattattcaaatggagttccgttcccagctccgcagtggaacgttgctccagtttgcccatctactcctgcttattcatattccttcccgaccactggttattatgcacagccatattccactttgaatcaggcctcgtatgatagctatgtcaactattttactcctaactatattccaaactatactccagtctacgatcaagctcag…	mwawllglgvykagelernpviltsamfptipfsatidfstgsayywnpstyswvpnpfqttpyysngvpfpapqwnvapvcpstpaysysfpttgyyaqpystlnqasydsyvnyftpnyipnytpvydqaqfpgtmpmppppmptaasttltppvpppmpvapstpsvpavqvkkeltslvlpvevkqesvedtprrctncqttdasewkraiskdnilcktcfdyrrthkenrptmkthvkkemktikae	253	longer ORF
brenneri	MED-1.25		Cbre_Contig4	complement(1326868..1327539)	CBN09370/partial (different amino ends)	atgttccctaccaccccgttcccagccaccatggacttttccactggctcttcttattattggaatccatctacctattattgggttccaaatccattccaaactaccccctactttccaaatgaagcacatcattggaatgtttctccattttaccctccaatcccaactattcctgactattcttattcagacccgaccactggttattatgcacagtcttacactattttgaatcaggcctcgtatgatagctatgtcaactattttactcctaactatattccaaactatactccattctatgatgcagctcaattttctggaaccatgcctatgccaccacctccgattcctactgctgcttcaacttcattcactccaccagctccacttacg…	mfpttpfpatmdfstgssyywnpstyywvpnpfqttpyfpneahhwnvspfyppiptipdysysdpttgyyaqsytilnqasydsyvnyftpnyipnytpfydaaqfsgtmpmppppiptaastsftppapltmsaspstpsvpavrvkqepvvfpvevkqepvediprrctncqttdasewksavskdnilcktcfdyrrthkenrptlkthvkketktiktk	224
brenneri	MED-1.26		Cbre_Contig4	complement(1376135..1376752)	CBN14847/partial (I have longer amino end)	atgttcccaactaccccattctcgtccaccatggatttcacctctccttactattggaacccatctaactattcttgggttccaaattttctcccctattatccaaatggagctcaattcccactgtggaattatgcttccccatctatcccttctattcccaactattcctatccaattccgaccactggttactacatcgatcctaactcttatttgaatcagacatcctgtagtacctacgtcaactactatactcctaactgtattcctactgatatttcttactacaatccaatgcagttccctggaacgttgccgatgccacctccaatccctgctgctccatctactccagctccacctgctccggaagtgaaatctgagccagcaccacca…	mfpttpfsstmdftspyywnpsnyswvpnflpyypngaqfplwnyaspsipsipnysypipttgyyidpnsylnqtscstyvnyytpnciptdisyynpmqfpgtlpmpppipaapstpappapevksepapptvprikkeliedvprtcsncqttgssnwrnvnskdnimchkcfiyrkvnkkdrptskpvmkevkkemktikte	206
brenneri	MED-1.27		Cbre_Contig4	complement(1914800..1915471)	CBN19428/partial(mineExtendsFartherUpstream)	atgtttcctactactccattcccatctaatatggacttttcttctccttactattggaaccctactgcttattcatgggctccaaatccattcttttctacttcctactatccaaatgaagccctgtttctagctcctcagtggaattttgctccattctatcctcctactactaattattcatatcccttcccaaccactggttatcatgcacagtcttattccacttttaatcaggcctcgtatgataactatgtaaactattttactcctaactatattccaatctatactccattctacaatcaagctcagtttcctggaaccatgcctatgccacaccctccgatgccaactgctgctgctgcaacaacactgattccaccagctccactttca…	mfpttpfpsnmdfsspyywnptayswapnpffstsyypnealflapqwnfapfyppttnysypfpttgyhaqsystfnqasydnyvnyftpnyipiytpfynqaqfpgtmpmphppmptaaaattlippaplsmpaapstttavqvkkeltpvielmkvkeepvedtprtcsncnttdasewknavskdnilcktcfeyrrahkenrpilktvvmkemrsimse	224
brenneri	END-1.1		Cbre_Contig526	(66458..66689,66738..67020,67079..67238)		atgtacccatcgtcttcatcttcttcttcatcctcttcaccaccccaagacaacaacaactcatatcaatatgcttatgtggataaagatggaaacatgcaaactcatgaaatgcatttcgcccatgaccatggtaacccatcaccagcgccctcaccgcatatgggatatgagaatattccgccacaatatgttatggatccggcctatgaagattttggacaatattttgttcaacaagtctacaatccaaccttcccagcgcttccaccagttccatcagtgctcggcagtttcgatatgtcggctatgaaccagaattatatgccatatcctccgcagccagtgtactttcaagaaggcgcacaagagcaatttgtggtgaagccgaagaagaca…	mypssssssssssppqdnnnsyqyayvdkdgnmqthemhfahdhgnpspapsphmgyenippqyvmdpayedfgqyfvqqvynptfpalppvpsvlgsfdmsamnqnympyppqpvyfqegaqeqfvvkpkkthtkkattpfhqnsvcsnpncrtrqttlwrrtdagtiecngcslyfrkngvqrpaelcnktimkrnrrpraeslqprvltvppesalenfetn	225
brenneri	END-1.2		Cbre_Contig23	(17615..17846,17894..18176,18233..18392)	CBN11639/partial - they have an extra two aa at 5' end	atgtacccatcgtcttcatcttcttcttcatcctcttcaccaccccaagacaacaacaactcatatcaatatgcttatgtggataaagatggaaatatgcaaactcatgaaatgcatttcgctcatgaccatggtaacccatcaccagcgccctcaccgcacatgggatatgagaatgttccgccacaatatgttatggatccggcctatgaagactttggacaatattttgttcaacaagtctaccacccaaccttcccagcgcttccaccagttccctcagtgctcggcagttttgacatgtcggctatgaaccagaattatatgccatatcctccacagccagtgtactttcaagaaggcgcacaagagcaatttgtggtgaagccgaagaagaca…	mypssssssssssppqdnnnsyqyayvdkdgnmqthemhfahdhgnpspapsphmgyenvppqyvmdpayedfgqyfvqqvyhptfpalppvpsvlgsfdmsamnqnympyppqpvyfqegaqeqfvvkpkkthakkattpfhqnsvcsnpncrtrqttlwrrtdagtiecngcslyfrkngvqrpaelcnktimkrnrrpraealqprvltvpsesalenfess	225	this could be an allele (unresolved heterozygosity)
brenneri	END-3.1	pseudogene	Cbre_Contig489	(67010..67089,67162..67333)	not identified / similar to CBN07808	ttgagtggacactgttcgaattgttcggtgaaggaatcgacatattggagaaaaaataagaatggagagcaagtttgcaagtgagtttcaatcttttcattttttgaacttttggatttttgtcaaaaaagtttgaaaaaacatcattccagtccatgcgctctctacgaaaaaacgacaggagtcaaacgacctgaatccctttggcaaaaggaaatcaataggagagatggaactattgataaggagttacaaattaagaagaaggaaaacaaagagaaacggaaggtaatacttttcagaaactacattcaaaatcacaattag	lsghcsncsvkestywrknkngeqvcnpcalyekttgvkrpeslwqkeinrrdgtidkelqikkkenkekrkvilfrnyiqnhn	84	partial - cannot find an upstream region
brenneri	END-3.2		Cbre_Contig489	complement(86275..86440,86483..86906,86959..87235)	not identified / similar to CBN10358, CBN20372, CBN01079	atgtatccacactcttcttcgtcttcttctgctgcctactattcgccttccaataatccaccacctccgatgttctatcacaacctcaattccgttcaactcttcggatatgggatgccaatggatcagcagatgcattttcatccaattcaaacggaaaatcaacaaatgatggctcaacagtatatcaagactgaggagatggcctatgatcagcagcagttcgtggctcagccagctgagcaatttgttagaattccagatggcatggtttatggtcaaccagcttatcctgtcatgaacatcatgaccccatatcatcaacaaccagccatcaatcaaatggattttgcaactcaacttctggattacgaagatccaatcggaaaaaataattca…	myphssssssaayyspsnnppppmfyhnlnsvqlfgygmpmdqqmhfhpiqtenqqmmaqqyikteemaydqqqfvaqpaeqfvripdgmvygqpaypvmnimtpyhqqpainqmdfatqlldyedpigknnsifefsgqpaypvmnstvpyqqqpvidqtsldfattlldyedpignienvtpsapeqrrkrsetkksvttggkmhqntecvncgcretkmwrrnergepecnpcnlyercngskrparlwnkptirrrrrpavepveqeagpstkmprmkteidnyf	289	has an interstitial imperfect tandem duplication of 46 amino acids
brenneri	END-3.3		Cbre_Contig107	complement(206396..206564,206607..206886,206939..207212)	CBN20372/exact	atgtatccgcactcttcttcgtcttctgctgcctactattcgttttccaataatccaccacctccgatgttctatcacaacatcaatcccgttcaacattttggatatgagatgccaatggatcagcagatgcattttcattcaattcaaatggaaaatcaacaaatgatggctcaacagtatgtcaaaactgaggagatgacctatgatcagcagcagttcgtggctcaaccagttgagcaatttgttggaataccagatggcatggtttatggtcaaccagcctatcctgtcatgaacatcatgaccccatatcatcaacaaccagccatcaatcgaatggattttgcaactcaacttctggattacgaagatccaatcggaaacattgagaatgtt…	myphsssssaayysfsnnppppmfyhninpvqhfgyempmdqqmhfhsiqmenqqmmaqqyvkteemtydqqqfvaqpveqfvgipdgmvygqpaypvmnimtpyhqqpainrmdfatqlldyedpignienvtppapeqrrkrseakksvttggkmhqntecvncgcretkmwrrnergepecnpcnlyercngskrparlwnkptirrrrrpavessveqeagpstkmprvkteidnff	241
brenneri	END-3.4		Cbre_Contig23	complement(546581..546743,546792..547077,547130..547433)	CBN01079/exact	atgtatccaaactcttcttcgtctttttctgctgactactattcgccttccaataatccaccacctccgatgttctatcacaacctcaatcccgttcaacactttggatatgggaggactctgcaggctatggagatgccagtggatcagcagatgcattttcatcctatccagccggaaaatcaacgaatgatggctcaacagtatatcaagacagaggagatgacctgtaatgagcagcagtttgtggctcaaccagctgagcaattttttggaatgccagacggcaacatgcaattttatggtcaaccagcttatcctgtcatgaacatcatggtcccgtaccaacaacaaccggccatcgatcaaacgtcattggattttgcaactcaacttccg…	mypnssssfsadyyspsnnppppmfyhnlnpvqhfgygrtlqamempvdqqmhfhpiqpenqrmmaqqyikteemtcneqqfvaqpaeqffgmpdgnmqfygqpaypvmnimvpyqqqpaidqtsldfatqlpdyedpigdienvappapeqrrkrseakksattggkmhqntecvncgcretkmwrrnergepecnpcnlyercngskrparlwnkptirrrrrpavessveqeagpstkmlrvkteidn	251	linked to END1
brenneri	END-3.5		Cbre_Contig1405	complement(3627..3789,3838..4123,4176..4479)	CBN10358/exact	atgtatccaaactcttcttcgtctttttctgctgactactattcgtcttccaataatccaccacctccgatgttctatcacaacctcaatcccgttcaacactttggatatgggaggactctgcaggctatggagatgccagtggatcagcagatgcattttcatcctatccagccggaaaatcaacgaatgatggctcaacagtatatcaagacagaggagatgacctataatgagcagcagtttgtggctcaaccagctgagcaatttgttggaatgccagacggcaacatgcaattttatggtcaaccagcgtatcccgtcatgaacatcatggtcccataccaacaacaaccggccatcgatcaaaagtcattggattttgcaactcaacttccg…	mypnssssfsadyysssnnppppmfyhnlnpvqhfgygrtlqamempvdqqmhfhpiqpenqrmmaqqyikteemtyneqqfvaqpaeqfvgmpdgnmqfygqpaypvmnimvpyqqqpaidqksldfatqlpdyedpigdienvappapeqrrkrseakksattggkmhqntecvncgcretkmwrrnergepecnpcnlyercngskrparlwnkptirrrrrpavessveqeagpstkmprvkteidn	251	small contig, could be an allele of one of END3.4
doughertyi	MED-1.1		CDOUG.scaffold01373	(9695..10180)	CDOUG.g24136.t1/exact	atggattccaattccactattcctggattcaatgctgattatattttcaattctgaagatatgtatccagattattccaatatgtggtcaaatagtccatactataacgattatgtgaattattattctggattctatcaaccttcttctcctgttcaaccaactgtggatccaaattctccatatcaatatgccaattcacctgctcatctatggaccagccccgcccctcaatatctaagctccgcctactttttgactccaactccatccaattccccaccaactcattcatcagaactctcaaataaaaaatgttctcactgctctgcaacagaaacatgtcaatggaggaatattcgatcaaaagatggaattctatgcaatgcttgcttcatt…	mdsnstipgfnadyifnsedmypdysnmwsnspyyndyvnyysgfyqpsspvqptvdpnspyqyanspahlwtspapqylssayfltptpsnsppthsselsnkkcshcsatetcqwrnirskdgilcnacfiykrkykelrpvdaiqkyknrggnglksth	162
doughertyi	MED-1.2		CDOUG.scaffold00035	(141950..142441)	CDOUG.g2815.t1/exact	atggattccaatttctctattcctggattcaatgctgattatattttcaattctgaaaatatgtattcagaatattccaatatgtggtcaaatagtccatactatcatgaatatgtgaattattattccggattctatcaaccttcatctcctgttcaaccaactgtggatccaaattctccatatcaatatgccaattcacctgctcatcactggaccagtccctctcctcaacatccaatccctggctccaactactttttgactccaactccatccttttcacaacaatctcaaacatcagaacttccaaataagaaatgctctcactgctctgcaacagaaacatgtcaatggaggaatattcgatcaaaagatggaatcctatgcaatgcttgt…	mdsnfsipgfnadyifnsenmyseysnmwsnspyyheyvnyysgfyqpsspvqptvdpnspyqyanspahhwtspspqhpipgsnyfltptpsfsqqsqtselpnkkcshcsatetcqwrnirskdgilcnacftykrkykelrpvdaiqkyknrggnglksth	164
doughertyi	MED-1.3		CDOUG.scaffold00035	147840..147986	CDOUG.g2818.t1/exact	atggattctaatttcactattcctgggtttaatgctgattatgttttcaattctgaaaatatgtatccagactattctaatatgtgttcaaatagtccctactatcatgactatgtgaagtattattctggtttctatcaaccttattctccagttcaaccaactgtggatccaaattcttcatatcaatatgccaattcacctgctcatctctggaccagccctacccctcaatatccaatctccagctccaactactttttgactccaactccatcaacttcaccacaatctcaatcaacggaacttccaaataaaaaatgctctcactgctcttcaacagaaacatgtcaatggaggaatattcgatcaaaagatggaattctatgcaatgcctgt…	mdsnftipgfnadyvfnsenmypdysnmcsnspyyhdyvkyysgfyqpyspvqptvdpnssyqyanspahlwtsptpqypisssnyfltptpstspqsqstelpnkkcshcsstetcqwrnirskdgilcnacftykrkykelrpvdaiqkyknrggnglksth	164
doughertyi	MED-1.4		CDOUG.scaffold01010	complement(22308..22823)	CDOUG.g21588.t1/exact	atggatcactatttccctagctctccatccaatgaggattacgtcttcaacgctcagtgtgttaatcccaactatttctcgggcccatcattctctgatacttcttactttgataattcgtattatcatgactacgtcaattactattctggattttatcaacctcaaatggattatacacagtcttattcactttcttcaactccacctgcaccaacatcttcatatcagttcaatgcaactccaccggctcaattctgggattctccaacgtctttggttcattcaatgcagccaaccacatctcaaggaactacttcatcttctagaaaattcgagaagaaatgctctcactgctctgcaacggaaacttgtcaatggaggaatgctcgatcaaag…	mdhyfpsspsnedyvfnaqcvnpnyfsgpsfsdtsyfdnsyyhdyvnyysgfyqpqmdytqsyslsstppaptssyqfnatppaqfwdsptslvhsmqpttsqgttsssrkfekkcshcsatetcqwrnarskdtimcnacftyqrkykkcrpltvvqkfrnreekkrtttk	172
doughertyi	MED-1.5		CDOUG.scaffold01010	complement(28704..29219)	CDOUG.g21590.t1/exact	atggatcactatttccctagctctccatccaatgaggattacgtcttcaatgctcaggatgttaattccaactacttttcgggctcttcattttctgatactccttactttgataattcctattatcgcgactatgtcaactactactctggatattatcaacctcaagtggattattccatgtcttcttcacttcctccatctccacctgcaccaacatcttcatatcaattcaatgcgactccaccaactcaattctgggattctcgaacatctttggttcattcaatgcagccaaccacatgtcaaggaactactccatcttctaggaagttcgagaaaaaatgctctcactgctctgcaacggaaaattgtcaatggaggaatgctcgatcaaag…	mdhyfpsspsnedyvfnaqdvnsnyfsgssfsdtpyfdnsyyrdyvnyysgyyqpqvdysmssslppsppaptssyqfnatpptqfwdsrtslvhsmqpttcqgttpssrkfekkcshcsatencqwrnarskdtilcnacftyqrkykkcrpitvvrkfrnreekkrttnk	172
doughertyi	MED-1.6		CDOUG.scaffold01010	complement(35187..35702)	CDOUG.g21592.t1/exact	atggatcactatttcccaagctctccatccaatgaggattacgtcttcaatgctcagaatgttaatcccaactatttctcgggttcttcattctctgatactccttactttgataattcttattatcacgactacgtcaactactactctggattttatcaacctcaagtggattatacccagtcttcttcacttcctccatctccacctgcaccagcatatccatatcaattcaatgcgactccaccgactcagttctgggattctccaacatctttggtccatccaatgcagccaaccacatctcaaggatccacaccatcttctaggaagttcgagaagaaatgctctcactgctccgcaacggaaacttgtcaatggaggaatgctcgatcaaag…	mdhyfpsspsnedyvfnaqnvnpnyfsgssfsdtpyfdnsyyhdyvnyysgfyqpqvdytqssslppsppapaypyqfnatpptqfwdsptslvhpmqpttsqgstpssrkfekkcshcsatetcqwrnarskdtilcnacftyqrkykkcrpltvvqkfrnreekkrtttk	172
doughertyi	MED-1.7		CDOUG.scaffold06780	(252..407,456..935)	CDOUG.g30629.t1/exact	atgacgatgccaccaactacagaaatgccaaaaaaagagccagtcaatgttgattttgattatcagttgacatttctcgatgagaatgggaaggtcaaaaagacgcagaaaaactgttgtaaggaattggaacagtacaagcaagagacggataaggttggtttcaggttcattttgattatttttcaacagtttttttttcagaaattccaagcactcttcgaacacatagtcacacttcagtccagaattgtggagctagaaagtgccatgctctcaacaccagtagtcaatccggtgcctttgaagaaatcagaagttgatcaaaacaacgtcagctatattcctgcacactctctaactggtccattatctccatgccagtctgaattgactcca…	mtmppttempkkepvnvdfdyqltfldengkvkktqkncckeleqykqetdkkfqalfehivtlqsrivelesamlstpvvnpvplkksevdqnnvsyipahsltgplspcqseltpstpsrpaltpkiqlpstnlmqrltpqltttpvtenptkkcshcgatetcqwrnvrskdsilcnacfvyqrkyknarpidaiqnyrnreekiktde	212	small contig, possible allele, amino part is not conserved
doughertyi	MED-1.8	pseudogene	CDOUG.scaffold08016	complement(555..821)	CDOUG.g30672.t1,g30579.t1,g29983.t1/exact, partial with g30629.t1	gccctgactccaaaaattcaattgccttctaccaatctaatgcagcgactcacacctcaattaactacaactccagtgactgaaaatccaacaaagaaatgctctcattgtggtgccactgaaacctgtcaatggagaaatgttcggtcaaaggattcaattctctgcaatgcctgttttgtctaccaacggaagtacaagaacgctcgaccaattgacgctattcagaattatagaaacagagaggagaagataaaaactgatgaataa	altpkiqlpstnlmqrltpqltttpvtenptkkcshcgatetcqwrnvrskdsilcnacfvyqrkyknarpidaiqnyrnreekiktde	89	small contig, probable allele, similar to Cdoug_MED1.11
doughertyi	MED-1.9		CDOUG.scaffold01354	(21665..22273)	CDOUG.g24020.t1/partial (they splice at end, much longer carboxyl part)	atggatcactatttccctagctctccatccaatgaggattacgtcttcaatgctcagaatgccaatcccaactatttctcgagttctccattctctgatactccctactttgataattcgtattatcacgactatgtcaaccactactctggattttatcaacctcaagtagattataaccagtcttccactcttcctccatctccacctgcaccaacatcttcatatcagttcaatgcaactccaccgactcaattttgggattctccgacgtctttggttcatccaatgcagccaaccacatctcaaggaactactccatcttctagaaaattcgagaagaaatgctctcactgctctgcaacggaaacttgtcaatggagaaatgctcgatcaaag…	mdhyfpsspsnedyvfnaqnanpnyfssspfsdtpyfdnsyyhdyvnhysgfyqpqvdynqsstlppsppaptssyqfnatpptqfwdsptslvhpmqpttsqgttpssrkfekkcshcsatetcqwrnarskdtilcnacftyqrkykkcrpltvvqkfrnreekneqllnnlpqlhvldmitnflvftgfflcllfipsys	203	extended carboxyl end
doughertyi	MED-1.10		CDOUG.scaffold01814	complement(16082..16537,16585..16740)	CDOUG.g26140.t1/exact	atgacgatgccaccaactacagaaatgccacaacaagagccaatcaatgttggtttttattatcaggtgacatttcttgatgagaatgggaaggtcaaaaaggcgcagaaaaagtgttgtgatgaatttgaacaattcaaggaagagacggataagaaatttcaagcactcttcgaacatatagtcacacttcagtccaaaattgtggagctagaaagtgccctgctctcaacaccagtagtcaatccggtgccattgaagacacctggattccatcaatctccacctgagccatcatctccatgccagtctgaattgactccatcaacaccattccgccctctcctgactccaaaaattcaatcgccttctaccaatctgatgcagctactcacacct…	mtmppttempqqepinvgfyyqvtfldengkvkkaqkkccdefeqfkeetdkkfqalfehivtlqskivelesallstpvvnpvplktpgfhqsppepsspcqseltpstpfrplltpkiqspstnlmqlltpqltttpvtenptkkcshcaatetcqwrnvrskdsilcnacfvyqrkyknprpleaiqsyrnreeekiktne	204	small contig
doughertyi	MED-1.11	pseudogene	CDOUG.scaffold07094	(1..267)	CDOUG.g30672.t1,g30579.t1,g29983.t1/exact, partial with g30629.t1	gccctgactccaaaaattcaattgccttctaccaatctaatgcagcgactcacacctcaattaactacaactccagtgactgaaaatccaacaaagaaatgctctcattgtggtgccactgaaacctgtcaatggagaaatgttcggtcaaaggattcaattctctgcaatgcctgttttgtctaccaacggaagtacaagaacgctcgaccaattgacgctattcagaattatagaaacagagaggagaagataaaaactgatgaataa	altpkiqlpstnlmqrltpqltttpvtenptkkcshcgatetcqwrnvrskdsilcnacfvyqrkyknarpidaiqnyrnreekiktde	89	small contig, allele of Cdoug_MED1.8?
doughertyi	MED-1.12	pseudogene	CDOUG.scaffold02788	complement(5615..6070,6118..6273)	CDOUG.g28371.t1/partial (they start at equivalent internal methionine)	atgacgatgccaccaactacagaaatgccaaaacaagagccaatcaatgttgattttgattattaggtgacatttctcgatgagaatgggaaggtcaaaaaagcgcagaaaaagtgttgtgataaatttgaacagttcaaggaagagacggataagaaatttcaagcactctttgaacatatagtcacacttcagtccaaaattgtggagctagaaagtgccatgctctcaacaccagtagtcactccgatgccattgaagacacctggattcaatcaatctctacctgagccatcatctccatgccagtctgaattgactccatcaactcaatcccggcctctcctgactccaaagattcaattgccttctaccaatctaatgcagctactcacacct…	mtmppttempkqepinvdfdy*vtfldengkvkkaqkkccdkfeqfkeetdkkfqalfehivtlqskivelesamlstpvvtpmplktpgfnqslpepsspcqseltpstqsrplltpkiqlpstnlmqlltpqvtttpvtenpskkcshcaatetcqwrnvrskdsilcnacfvyqrkyknprpleaiqnyrnreeekmktde	204	small contig, pseudogene has a stop in the middle of conserved amino part
doughertyi	MED-1.13	pseudogene	CDOUG.scaffold06413	(1..267)	CDOUG.g30672.t1,g30579.t1,g29983.t1/exact, partial with g30629.t1	gccctgactccaaaaattcaattgccttctaccaatctaatgcagcgactcacacctcaattaactacaactccagtgactgaaaatccaacaaagaaatgctctcattgtggtgccactgaaacctgtcaatggagaaatgttcggtcaaaggattcaattctctgcaatgcctgttttgtctaccaacggaagtacaagaacgctcgaccaattgacgctattcagaattatagaaacagagaggagaagataaaaactgatgaataa	altpkiqlpstnlmqrltpqltttpvtenptkkcshcgatetcqwrnvrskdsilcnacfvyqrkyknarpidaiqnyrnreekiktde	89	small contig, partial gene
doughertyi	MED-1.14		CDOUG.scaffold05489	(252..407,456..938)	CDOUG.g30357.t1/exact	atgacgatgccaccaactacagaaatgccaaaaaaagagccagtcaatgttgattttgattatcagttgacatttctcgatgagaatgggaaggtcaaaaagacgcagaaaaactgttgtaaggaattggaacagtacaagcaagagacggataagaaattccaagcactcttcgaacacatagtcacacttcagtccagaattgtggagctagaaagtgccatgctctcaacaccagtagtcaatccggtgcctttgaagaaatcagaagttgatcaaaacaacgtcagctatattcctgcacactctctaactggtccattatctccatgccagtctgaattgactccatcaacaccatcccggcctgccctgactccaaaaattcaattgccttct…	mtmppttempkkepvnvdfdyqltfldengkvkktqkncckeleqykqetdkkfqalfehivtlqsrivelesamlstpvvnpvplkksevdqnnvsyipahsltgplspcqseltpstpsrpaltpkiqlpstnlmqrltpqltttpvtenptkkcshcgatetcqwrnvrskdsilcnacfvyqrkyknarpleaiqnyrnreedktktne	213	small contig
doughertyi	MED-1.15	pseudogene	CDOUG.scaffold04509	(1..267)	CDOUG.g30672.t1,g30579.t1,g29983.t1/exact, partial with g30629.t1	gccctgactccaaaaattcaattgccttctaccaatctaatgcagcgactcacacctcaattaactacaactccagtgactgaaaatccaacaaagaaatgctctcattgtggtgccactgaaacctgtcaatggagaaatgttcggtcaaaggattcaattctctgcaatgcctgttttgtctaccaacggaagtacaagaacgctcgaccaattgacgctattcagaattatagaaacagagaggagaagataaaaactgatgaataa	altpkiqlpstnlmqrltpqltttpvtenptkkcshcgatetcqwrnvrskdsilcnacfvyqrkyknarpidaiqnyrnreekiktde	89	small contig, partial gene
doughertyi	MED-1.16		CDOUG.scaffold02843	complement(5838..6320,6370..6525)	CDOUG.g28447.t1/exact	atgacgatgccaccaactacagaaatgccaaaacaagagccagtcaatgttgatattgattatcaggtgacatttctcgatgagaatggaaaggtcaaaaaggcgcagaaaaagtgttgtgatgaatttgaacaattcaagaaagagacggataagaaatttcaagcactcttcgaacatatagtcacacttcagtccagaattgtggagctagaaagtgcgattctctcaacaccagtggtcaatccggtgccattgaagaaacaagaagttgatcaaaacaacgtcagctatattcctgcacactctccaactggtccattatctccatgcccgtctcaattgactccatcaacaccattccggcctttcttgactccaaagattcaatatcctact…	mtmppttempkqepvnvdidyqvtfldengkvkkaqkkccdefeqfkketdkkfqalfehivtlqsrivelesailstpvvnpvplkkqevdqnnvsyipahsptgplspcpsqltpstpfrpfltpkiqypttnlmqrltpqltttpvtenptkkcshcaatetcqwrnvrskdsilcnacfvyqrkyknprpleaiqnyrnreeekiktne	213	small contig
doughertyi	MED-1.17		CDOUG.scaffold00634	complement(34651..35166)	CDOUG.g17807.t1/exact	atggatcactatttccctagctctcccttcaatgaggattacgtcttcaatgctcagaatgttaatcctaattatttctcgggctcttcattctctgatacttcttactttgataactcttattatcacgattacgtcaactactactctggattttatcaacctcaagtgaattatacccagtcttcttcacttcctccatcttcacctgcaccaacatcttcatatcagttcaatgcgactccaccgactcaattctgggattctccaacatctttggttcatccaatgcagccaaccacatctcaaggatctactccatcttctaggaagttcgagaagaaatgttctcactgctctgcaatggaaacttgtcaatggaggaatgctcgatcaaag…	mdhyfpsspfnedyvfnaqnvnpnyfsgssfsdtsyfdnsyyhdyvnyysgfyqpqvnytqssslppsspaptssyqfnatpptqfwdsptslvhpmqpttsqgstpssrkfekkcshcsametcqwrnarskdtilcnacftyqrkykkcrpltvvqkfrnreekklkatk	172	intronless, similar to Cdoug_MED1.6 above
doughertyi	MED-1.18		CDOUG.scaffold02559	(727..882,931..1413)	CDOUG.g27994.t1/exact	atgacgatgccaccaactacagaaatgccaaaacaagagccaatcaatgttgattttgattatcaggtgacatttctcgatgagaatgggaaggtcaaaaaggcgcagaaaaagtgttgtgatgaatttgaacaattcaaggaagagacggataagaaatttcaagcactcttcgaacatatagtcacacttcagtccaaaattgtggagctagaaagtgccattctctcaacaccagtggtcaatccggtgccattgaagaaacaagaagttgatcaaaacaacgtcagctatattcctgcacactctccaacaggtccattatctccatgcccgtctcaattgactccatcaacaccattccggcctttcttgactccaaagattcaatatcctact…	mtmppttempkqepinvdfdyqvtfldengkvkkaqkkccdefeqfkeetdkkfqalfehivtlqskivelesailstpvvnpvplkkqevdqnnvsyipahsptgplspcpsqltpstpfrpfltpkiqypttnlmqrltpqltttpvtenptkkcshcaatetcqwrnvlskdsilcnacfvyqrkyknarpieaiqnyrnreeekiktne	213
doughertyi	MED-1.19	pseudogene	CDOUG.scaffold03216	(3206..3589)		ctcttattatcacgactatgtcagctactactcaggattttatcaaccacagatggattattccatgtcttcttcacttccttcttctccacctgcaccaacatattcatatcagttcaatacaactccaccgactcaaatctgggattctttgacgtctttgattcatccaatgcagccacaacatctcaaggatctacaccatcaaagtctaaaaaatttgagaaaaaatgctctcattgctctgcaacggaaacttgtcaatggaggaattctcgatcaaaggatacaattctatgcaatgcctgcttcacttatcgacggaaatacaagaaatgtcgtccatttaccgtagttcaaaagttcagaattagaacagaaaaataa	lllsrlcqlllrilsttdglfhvfftsffstctnifisvqynstdsnlgffdvfdssnaattsqgstpskskkfekkcshcsatetcqwrnsrskdtilcnacftyrrkykkcrpftvvqkfrirtek	128	partial gene
doughertyi	MED-1.20		CDOUG.scaffold01439	(5947..6507)	CDOUG.g24546.t1/exact	atggaatctaacttcaatgttcctctcttcaatccaggatatgtattcaactctgagaatgtgaattcagtctattcatatagttctgttactttctcgagtactaccatttcttcaaataacttctcctatcaagaagatgtttgttcatttggttctggatctttctccaatccaaccatttcttcgaacagttcctactataaggaatatgtgaactattattctggattcactcagcctgcttttacggctactcctcctgctcaaccagctcaatgctatgtttctgggtaccaatacaactttggtgccaactcaacaactcagcaatggaattcatcatgttcttctgccacttctacttttccgtatccaactccaagtccaactacaaca…	mesnfnvplfnpgyvfnsenvnsvysyssvtfssttissnnfsyqedvcsfgsgsfsnptissnssyykeyvnyysgftqpaftatppaqpaqcyvsgyqynfgansttqqwnsscssatstfpyptpsptttppvqtsqnpekkcshcsttetcrwrnirskneilcnacvregklegngasngsy	187	short basic domain
doughertyi	MED-1.21		CDOUG.scaffold01439	(10832..11314)	CDOUG.g24549.t1/exact	atgtctgttctattagtactggatctttctgcaaccacggcttcaaatagctcctactatcaggactacgtgaactactattctggattcactcaacctgtcgtagattgttctatgactattcctcctgctcaattagctcaaaactctgcttctggataccaatacaactttgatgtcaattcaacagctcagcaattgaattccccatgttattctgtcacttctactattcaggattcatttcaaactccaattccaactataacaccaccaattcaaaaatctaaacgtccggaaaagaaatgctctcactgttcaaccatggaaacctgtcgatggagaaacattcgatcaaaaaatggaattttgtgcaatgcgtgctatacgtacgaaagg…	msvllvldlsattasnssyyqdyvnyysgftqpvvdcsmtippaqlaqnsasgyqynfdvnstaqqlnspcysvtstiqdsfqtpiptitppiqkskrpekkcshcstmetcrwrnirskngilcnacytyereswkamvrpveviekhnnrrekklkstl	161
doughertyi	MED-1.22		CDOUG.scaffold01439	complement(14718..15344)	CDOUG.g24551.t1/exact	atggaatccaacttcaatgttcctctcttcaatccaggatatgtattcaactctgagaatgtgaattcagtctattcatatagttctgttactttctcgagtactgccatttcttcaaataacttctcctatgaagaagatgtctgttcatttagttctggattttcctccaatgcaactatgtcttcaaatagttcctactatcaggactatgtgaactactattctggatttactcaacctgtcgtagattgttctatgactactccttttgctcaaccagctcaaaactctgctcctggataccaatacaacttcgatgtcaattcaacagctcagaaatggaatttaccatgttattttaccacttctactattccgaatttatttcaaactcca…	mesnfnvplfnpgyvfnsenvnsvysyssvtfsstaissnnfsyeedvcsfssgfssnatmssnssyyqdyvnyysgftqpvvdcsmttpfaqpaqnsapgyqynfdvnstaqkwnlpcyfttstipnlfqtpsptatppaqtsqcpekkcshcsttetcrwrnirskngilcnacyayereswkamvrpveviekyknrkekklkssh	209
doughertyi	MED-1.23		CDOUG.scaffold01370	(24905..25063,25524..26016)	CDOUG.g24121.t1/exact	atgaacatgccaccaaacacagcaatgccacaaccagtcgaaccagatttcttctgtgaggacacatgccgaattctggaacagaagaacgaaaaagaggaggagcaaaagagatgctgtgatgatgaattcgaaaaagttaagaaggaaactgatgagaaattccaagcaatcttcgaacacatagtcacacttcagtccaaaatagtggagctagaaagtgtcaagctcgcaacacaactagtgccattgaagacaccaaaagatgatcaaagcaatttttctgggctctatcaatttccaaaagtcagtccattgtttcttcaatcaccgcctgtgccgtctggattaacttcatcgacccaatttggggattctacgaaatctgggatctcaaac…	mnmppntampqpvepdffcedtcrileqknekeeeqkrccddefekvkketdekfqaifehivtlqskivelesvklatqlvplktpkddqsnfsglyqfpkvsplflqsppvpsgltsstqfgdstksgisniqypflmqpitsqatttpkksekskkkcshcaatetcqwrrarskesilcnacfvyqrkykisrpltvvqtyrnredeklrttk	217	has intron, diverged but like 1.18
doughertyi	MED-1.24		CDOUG.scaffold01299	(12242..12745)	CDOUG.g23676.t1/exact	atggatcactatttccctctctcgccatccaatgaggattacgtcttcaatgctgagaatgttaatcccaactacttttcgggctcttcattctctgatacttcttactttgataattcttattatcatgactacgtcaactactactttggattttatcaacctcaaatagattattcccagttttcttcacttcctccatctccacctgcaccaacatattcatttcagttcaatgcaactccaccgactcacttctgggattctccaacgtctttgattcatccgatgcagcccacaacatctcaaggatctacaccatcaacgtctaaaaaattcgagaaaaaatgctctcactgcttcgcaacggaaacttgtcaatggaggaattctcgatca…	mdhyfplspsnedyvfnaenvnpnyfsgssfsdtsyfdnsyyhdyvnyyfgfyqpqidysqfsslppsppaptysfqfnatppthfwdsptslihpmqpttsqgstpstskkfekkcshcfatetcqwrnsrskdtilcnawftyqrkykkcrpftvvqkfrnrtern	168	similar to Cdoug_MED1.6
doughertyi	MED-1.25		CDOUG.scaffold01908	(1674..2016,2075..2295)	CDOUG.g26457.t1/exact	atggaatccaacttcaatgttcatctcttcaatccaggctatgtattcaactctgagaatgtgaatacactctattcatatagttctgttactttctcgagtactaccatttattcgaatcaatgttactaccaagaagatgtctgttctattagttctggatctttctccaatccaaccatttcttcttatagttcctactatcaggactatgtgaactattattctggattcactcaacctactgtggattattctatgactactcctcctgctcaaccagctcaatgccttgctcctggataccaatacaaatttgatgtcagttcaacagctcagcaatgtaatttaccatctacaacaccaccagttcaaacatctcaaaatgcggaaaagaaa…	mesnfnvhlfnpgyvfnsenvntlysyssvtfssttiysnqcyyqedvcsissgsfsnptissyssyyqdyvnyysgftqptvdysmttppaqpaqclapgyqykfdvsstaqqcnlpsttppvqtsqnaekkcshcsttetcrwknirskdgilcnacyaykreswkamvrpveviekyknrrekklksth	192	needed intron to prevent +1 fs and long protein
doughertyi	MED-1.26	pseudogene	CDOUG.scaffold01213	comp(28942..29088)		aaaaaatgctctcattgctctgcaacggaaacttgtcaatggaggaattctcgatcaaaggatacaattctgtgcaacgcctgcttcacttatcgacggaaatagaagaaatgtcgtccacttactgttgttcaaaagttcagagctcgaacggaaaataaattgaaggctactaactaa	kkcshcsatetcqwrnsrskdtilcnacftyrrk*kkcrpltvvqkfrartenklkatn	59	pseudogene, fragment
doughertyi	MED-1.27		CDOUG.scaffold01029	(1902..2549)	CDOUG.g21785.t1/exact	atgcaatccaacttcaatgttcctcctttcaatccaggctatgtattccactcagagagtgtgaatccagactatttatatagttctgttacttttccgagtactgccatctcttccaataacttattctatcagaacaatgtctgtccattaagttctggcttattctccaatgctaccatgtcatcgaataattcgtactatcaggactatctgaactattattctggattcactaaacctgcttttatggctacttcttttgctcaaacacctcaatacactgctcctggataccaatacaatgccaattcaacagctcagcaatcgaattcaccatgttattctgcctcttctacttacccggatccatttcaattttcaactacaacaccacca…	mqsnfnvppfnpgyvfhsesvnpdylyssvtfpstaissnnlfyqnnvcplssglfsnatmssnnsyyqdylnyysgftkpafmatsfaqtpqytapgyqynanstaqqsnspcysasstypdpfqfstttppapsttppvpattppaqksqrperkcshcsttetcqwrnvrskngvlcnacdvykrqslralvrpveiiekyktrranklksth	216
doughertyi	MED-1.28	pseudogene	CDOUG.scaffold01862	complement(973..1606)		atggaatccaacttcaatgttcctcttttcattccaggccatgtattccactctgagaatgtgaatccagactattcatatagttatgttactttcttgagcactaccatctcttctaataacttatactatcagaactgttctttcattcctggctcattctccaatgctaccatatcatcgaatagttcctaatataagggctatctgaactattattctggatatactcaaactgcttttatggctacttcccctgctcaagcacctcacttgtcagtaccctgctcctgaataccaatataacattgatgtcaattcaacagctcagcaatcgaattcaccatgttattctgcaacttctacttttccgtattcatttcaattttctatcacaat…	mesnfnvplfipghvfhsenvnpdysysyvtflsttissnnlyyqncsfipgsfsnatiss..[fs?]..ypapeyqynidvnstaqqsnspcysatstfpysfqfsitippapattlpaqksqrpvrkcsqcsttetcqwknirskngilcnacdtykrqslkawvrpmeviekyetrranklksth	188	has a +1 frame shift with no obvious way to splice around it
doughertyi	MED-1.29	pseudogene	CDOUG.scaffold02809	(5393..5923)	CDOUG.g28400.t1,g27185.t1,g26954.t1,g26953.t1/exact(up to stop)	atgcaatccaacttcaatgttcctcttttcaatccaggctatgtattccactcagagaatgtgaatccagactattcatatagttcttttgcttattcgagtactaccatctcttccaacaacttattctatcaggacaatgtcagttcaatgagttctggcttattctccaatgctaccatatcatcgaataattcctactatcaggactatctgaactattattctggatttactcaacctgcttttatagctacttcttctgctcaaacacctaaaacacttccagctacaacaccaccagctccagttacaacaccaccagctcaaaaatctcaacacccggaaagaaaattctctcactgttcaaccacggaaacgtgtcaatggagaaatatt…	mqsnfnvplfnpgyvfhsenvnpdysyssfayssttissnnlfyqdnvssmssglfsnatissnnsyyqdylnyysgftqpafiatssaqtpktlpattppapvttppaqksqhperkfshcsttetcqwrni*skngilcnacdvykrqslkalvrpveiiekyktrranklksth	177	has stop in zinc finger, loss of first C in C4
doughertyi	MED-1.30	pseudogene	CDOUG.scaffold02166	complement(6495..7025)	CDOUG.g28400.t1,g27185.t1,g26954.t1,g26953.t1/exact(up to stop)	atgcaatccaacttcaatgttcctcttttcaatccaggctatgtattccactcagagaatgtgaatccagactattcatatagttcttttgcttattcgagtactaccatctcttccaacaacttattctatcaggacaatgtcagttcaatgagttctggcttattctccaatgctaccatatcatcgaataattcctactatcaggactatctgaactattattctggatttactcaacctgcttttatagctacttcttctgctcaaacacctaaaacacttccagctacaacaccaccagctccagttacaacaccaccagctcaaaaatctcaacacccggaaagaaaattctctcactgttcaaccacggaaacgtgtcaatggagaaatatt…	mqsnfnvplfnpgyvfhsenvnpdysyssfayssttissnnlfyqdnvssmssglfsnatissnnsyyqdylnyysgftqpafiatssaqtpktlpattppapvttppaqksqhperkfshcsttetcqwrni*skngilcnacdvykrqslkalvrpveiiekyktrranklksth	177	has stop in zinc finger, loss of first C in C4
doughertyi	MED-1.31	pseudogene	CDOUG.scaffold02074	(5052..5582)	CDOUG.g28400.t1,g27185.t1,g26954.t1,g26953.t1/exact(up to stop)	atgcaatccaacttcaatgttcctcttttcaatccaggctatgtattccactcagagaatgtgaatccagactattcatatagttcttttgcttattcgagtactaccatctcttccaacaacttattctatcaggacaatgtcagttcaatgagttctggcttattctccaatgctaccatatcatcgaataattcctactatcaggactatctgaactattattctggatttactcaacctgcttttatagctacttcttctgctcaaacacctaaaacacttccagctacaacaccaccagctccagttacaacaccaccagctcaaaaatctcaacacccggaaagaaaattctctcactgttcaaccacggaaacgtgtcaatggagaaatatt…	mqsnfnvplfnpgyvfhsenvnpdysyssfayssttissnnlfyqdnvssmssglfsnatissnnsyyqdylnyysgftqpafiatssaqtpktlpattppapvttppaqksqhperkfshcsttetcqwrni*skngilcnacdvykrqslkalvrpveiiekyktrranklksth	177	has stop in zinc finger, loss of first C in C4
doughertyi	MED-1.32	pseudogene	CDOUG.scaffold02074	(11629..12159)	CDOUG.g28400.t1,g27185.t1,g26954.t1,g26953.t1/exact(up to stop)	atgcaatccaacttcaatgttcctcttttcaatccaggctatgtattccactcagagaatgtgaatccagactattcatatagttcttttgcttattcgagtactaccatctcttccaacaacttattctatcaggacaatgtcagttcaatgagttctggcttattctccaatgctaccatatcatcgaataattcctactatcaggactatctgaactattattctggatttactcaacctgcttttatagctacttcttctgctcaaacacctaaaacacttccagctacaacaccaccagctccagttacaacaccaccagctcaaaaatctcaacacccggaaagaaaattctctcactgttcaaccacggaaacgtgtcaatggagaaatatt…	mqsnfnvplfnpgyvfhsenvnpdysyssfayssttissnnlfyqdnvssmssglfsnatissnnsyyqdylnyysgftqpafiatssaqtpktlpattppapvttppaqksqhperkfshcsttetcqwrni*skngilcnacdvykrqslkalvrpveiiekyktrranklksth	177	has stop in zinc finger, loss of first C in C4
doughertyi	END-1		CDOUG.scaffold00055	complement(10509..10698,10997..11097,11161..11330,11379..11613)	CDOUG.g3938.t1/partial (they have three extra amino acids, a shorter intron by 9 bases)	atgtatccatcgtcttcgtcctcttcttcatcttcttctcctccgccacctccggagaatacatcatattcctatggtatcgttgataaggacggaaatgtgcattctcatcaaatgcatttttcacacgaccatggaaacccatcgccagttcatttcgaacaaaacttggtctatcaaatggctccggctccgtatgtaatggaccaaggttttgaagaattcggacaatactttccagcatacgctgtacctactcaaccacttcctccagtttcttctatgttgggaagtttcgatatgacatctatgaatcagacatacgttcaatatcatccacagttcaatcagaattatcttcaaaatcaggaaaacattgtgacagttagaagtcggaaa…	mypsssssssssspppppentsysygivdkdgnvhshqmhfshdhgnpspvhfeqnlvyqmapapyvmdqgfeefgqyfpayavptqplppvssmlgsfdmtsmnqtyvqyhpqfnqnylqnqenivtvrsrkttpstfhhnsvcsnpncgtrnttlwrrtnngniecngcslyfrkngvqrpaelcnktilkrnrrpraevpssshvnhplqerksmineqqidsendeph	232	beginning of scaffold, likely misses end-3 on another scaffold
doughertyi	END-3.1		CDOUG.scaffold00694	complement(30230..30377,30423..30771,30818..31148)	CDOUG.g18574.t1/exact	atgtattcctcgtcatcgtcttcttcttcatactcttcttcttcgaattccaattctccaccgactcaaatgccaaatcagatgttctacgtatcttctggtgatcaaatcactactgatttcggatatggaacaattcatcctcaagatgttgatgtgaatcatcagatgaattcttatcagtttcaacgcgacgataatcagttgttgactccaaaaacggaaaaagtagaatatactggagatcaatttctcagtcatcctactactcaacagtttgagcagtttgttcctgttggtggaattcatggaaataacgacgcagtttttggtggtcaagaaaactttcagcagttcggatatttcaatattccacatggagtctgctcaccaaacgca…	myssssssssyssssnsnspptqmpnqmfyvssgdqittdfgygtihpqdvdvnhqmnsyqfqrddnqlltpktekveytgdqflshpttqqfeqfvpvggihgnndavfggqenfqqfgyfniphgvcspnagffdqnafvditnqqvhqnydvsntgfnylpmqmqmelssiaeapqvkpkrrrapkeeikkvssamhqnsfcsncgcretklwrrdingfpecnacnlyermnktkrpqhlwnkvsgkrtrrpvvrvvqdnemeneedddkqy	276	clear END-3 ortholog, has four good MED sites
doughertyi	END-3.2		CDOUG.scaffold00292	complement(31612..31765,31813..32125,32176..32512)	CDOUG.g11713.t1/exact	atgtactctcaatctttctcttatcctttctcttattctggagactcatcttcgtcttctaactcaaattctccacctgctccacaaatgtatctccaaaacggtactgttggaaattctatggattatggaaatctgcctatgcctcagccaatgaattatcatcattttcaacaagatcctaatcaaatgatgacaaatccagagcagtttggaatgattaaagatgggatgggctacaatagagatcaatatcttatggatccaacacagcaattcgggcagtttggagcaattggtggaattccagaaaataatgaaaatgtggaaaactttggccaacaaaatttccaagatttccaaaattatccattcttcaatgttggtattccacaagaa…	mysqsfsypfsysgdsssssnsnsppapqmylqngtvgnsmdygnlpmpqpmnyhhfqqdpnqmmtnpeqfgmikdgmgynrdqylmdptqqfgqfgaiggipennenvenfgqqnfqdfqnypffnvgipqevqpqpmdqlvqqhqtindipefdalpmqssnfnfqntapkrrrhsnkairkastmhqntscancgcretklwrrneitglsecnacnlyermkgtkrpehlwnkptakrtrrpaapvkkdnqpsedvdaqaqwym	268	three MED sites
tropicalis	MED-1.1		CTROP.Scaffold629	complement(23105378..23105833)	CTROP.Csp11.Scaffold629.g13920.t1/theirs is shorter by 11aa at amino end	atgttccatggaatacattccattattcttttgatgagaatacaaatcgatcatgttcttcttcaaattcttcaattgatgcgatccatggctctccgattaaccaaggaagttcttctcctgctccatcacaacgaccatcctacctcctttttctcttcaattgatgtcatgaatggttccccgataacccaagtacattatcctcatgctgctccgactcctccttcccaacaacaatccacttcttcttcttcttcgaaccgcccatctcgaaagtgtacagtatgctcaattacggaaacatgtaaatggaggaatgttcgatcgaacgatggaattctatgcaatgcttgtttcatttatcaaaggaaatacgacagtactcgtccggacaaa…	mfhgihsiillmriqidhvllqilqlmrsmalrltkevllllhhndhptsffssidvmngspitqvhyphaaptppsqqqstsssssnrpsrkctvcsitetckwrnvrsndgilcnacfiyqrkydstrpdkaqnnykkrkedkkmksvnk	152
tropicalis	MED-1.2		CTROP.Scaffold629	complement(23111893..23112312)	CTROP.Csp11.Scaffold629.g13924.t1/theirs is shorter at amino end	atgggaaacaatgaatccatattctggatatctcaactattattctggagtctatgttccatggaatacattccattattttttgatgaaaatacaaatcgatcaatgacaacttgttcttcttcaaattcttcgatggatgcgatccatggatctccgatgactcaatcttctccggcttccagtcctccatcacaacgacaatccatttctgcttcttcgaaccgcccatctcgaaagtgtacagtatgctcaattacggaaacatgtaaatggaggaatgttcgatcgaacgatggaattctatgcaatgcttgtttcatttatcaaaggaaatacgacagtactcgtccggacaaagctcagaacaactacaagaagaggaaagaggacaagaat…	mgnnesifwisqllfwslcsmeyiplffdentnrsmttcsssnssmdaihgspmtqsspassppsqrqsisassnrpsrkctvcsitetckwrnvrsndgilcnacfiyqrkydstrpdkaqnnykkrkedknkmksvnk	140	shorter amino end
tropicalis	MED-1.3		CTROP.Scaffold629	complement(23158614..23159147)	CTROP.Csp11.Scaffold629.g13942.t1/theirs has more at 3' end	atggccttcaattctcgttctgctaatggatgggaaacaatgaatccatattctggatatttcaactattattctggagtctatgttccatggaatacattccattattcttttgatgagaatacaaatcgatcatgttcttcttcaaattcttcaattgatgcgatccatggctctccgattaaccaaggaagttcttctcctgctccatcacaacgaccatccacctcctttttctcttcaattgatgtcatgaatggttccccgataacccaagtacattatcctcatgctgctccgactcctccttcccaacaacaatccacttcttcttcttcttcgaaccgcccatctcgaaagtgtacagtatgctcaattacggaaacatgtaaatggagg…	mafnsrsangwetmnpysgyfnyysgvyvpwntfhysfdentnrscsssnssidaihgspinqgssspapsqrpstsffssidvmngspitqvhyphaaptppsqqqstsssssnrpsrkctvcsitetckwrnvrsndgilcnacfiyqrkydstrpdkaqnnykkrkedknkmksv	178	very 3'end is lost because scaffold has NNNNNN
tropicalis	MED-1.4		CTROP.Scaffold629	(23455383..23455850)		atggatgctcatcgtcccgattcgtcctcctcgggctgtgttggctctcagaataccgatgtgtacaccagcacttatttcatggcttattacgactatatttctaattattctgggttctatcaaccctcttctttcatggctgatcaaattcctcaattacacatggattcaatggaccaaaatgctttcgggacatgcaaaccgatggattcgccttgttccacaactaatttcacaaatagtcatccagttcaatcaccaacgtctttcattggggaaacgtcaccagtttcgaatcctatcagttcaaagatgtcttctctacccggaccaaagatatgctcagtttgttcaaccacgaaaacatgtcgctggaggaagaaccaatcaaaaatg…	mdahrpdssssgcvgsqntdvytstyfmayydyisnysgfyqpssfmadqipqlhmdsmdqnafgtckpmdspcsttnftnshpvqsptsfigetspvsnpisskmsslpgpkicsvcsttktcrwrknqskmecnacyiyrqkykknrpsyvfrn	156	shortened at carboxyl end
tropicalis	MED-1.5	pseudogene	CTROP.Scaffold318	367..531	CTROP.Csp11.Scaffold318.g795.t1/exact	atggccttcaattctcgttctgtcaatggatgggaaacaatgaatccatattctggatatctcaactattattctggagtctatgttccatggaatacattccattattcttttgatgagaatacaaatcgatcatgttcttcttcaaattcttcaattgatgcgatccatggatctccgattaatcaaggaagttcttctcctgctccttcacaacgacaatccacttcttcttcaaaccgcccatctcgaaagtgtacagtatgctcaattacggaaacatgtaaatggaggaatgttcgatcgaacgatggaattctatgcaatgcttgtttcatttatcaaaggaaatacgacagtactcgtccagacaaagctcagaataactacaagaagagg…	mafnsrsvngwetmnpysgylnyysgvyvpwntfhysfdentnrscsssnssidaihgspinqgssspapsqrqstsssnrpsrkctvcsitetckwrnvrsndgilcnacfiyqrkydstrpdkaqnnykkrkedknkmksvnk	145	could be allele of Ctrop_MED1.3, has internal deletion
tropicalis	MED-1.6		CTROP.Scaffold630	complement(19809390..19809674)	CTROP.Csp11.Scaffold630.g22001.t1/exact	atggttcccccgataacccaagtacattatcctcatgctgctccgactcctccttcccaacaacaatccacttcttcttcttcttcgaaccgcccatctcgaaagtgtacagtatgctcaattacggaaacatgtaaatggaggaatgttcgatcgaacgatggaattctatgcaatgcttgtttcatttatcaaaggaaatacgacagtactcgtccggacaaagctcagaacaactacaagaagaggaaagaggacaagaataagatgaagagtgtcaataagtaa	mvppitqvhyphaaptppsqqqstsssssnrpsrkctvcsitetckwrnvrsndgilcnacfiyqrkydstrpdkaqnnykkrkedknkmksvnk	95	small, possible paralog of Ctrop_MED1.1?
tropicalis	END-1		CTROP.Scaffold481	complement(65401..65575,66423..66523,66567..66721,66767..66974)	CTROP.Csp11.Scaffold481.g1861.t1,CTROP.Csp11.Scaffold481.g1861.t2/partial, .t2 has longer 5' end, both lack the 3' exon	atgtatccatcgtcctcatcgtcttcttcttcttcctctcctccacaacatcagaatacatattcttatggatatatcgacaaaaatgggaatatgcattctcatcaaatgcactttgacaacgggaatcccgtagatcagatgccctatgagcctgtcccccagccacagtatgaccagacatatgaggatttcggacaatatttcgtgtatcccgtccaaccacttccaccagtcacttcggtcttcggaagtttcgatgtgacaccaatgaaccccgggtatgtacagtatccccaacagacctatatcccggaacaagagaactatggagggaaaccaaggaaaagtatcccgaaaaagccttccacctaccacatcaaatcggtgtgctcgaat…	mypssssssssssppqhqntysygyidkngnmhshqmhfdngnpvdqmpyepvpqpqydqtyedfgqyfvypvqplppvtsvfgsfdvtpmnpgyvqypqqtyipeqenyggkprksipkkpstyhiksvcsnpncgtrqttlwrrtesgavecngcslyfrkngvqrpaelcnktimkrnrrpraeltnhdgqhkqlqqgeqypgdysggsl	213
tropicalis	END-3		CTROP.Scaffold481	complement(44933..45062,45107..45615)	CTROP.Csp11.Scaffold481.g1852.t1/partial, they add an intron	atgtattcttattcttcttcttcttccaatcaacctgctcaaatgccaaatgagatgttcttccaagacggaaatttccaatacgtccaggcggctccagtggatcagaatcagatggtcttcaatcaattccaaggggaaaatcagatgatggtcccacaggtcaactatcttatggatcaaccatttggcaacaatatggagtattacggtaggtcatttagcctaaaaactttgtcaactatagagatttcaggtgctgctcaaccaaactgtcagtatgcagccatggattacggtcaaattggtcaaatggttccccaacagaataacgagaacatgttcgactacaatttcgaggctgctccagctccagctccaagaaagagacgttctccg…	mysysssssnqpaqmpnemffqdgnfqyvqaapvdqnqmvfnqfqgenqmmvpqvnylmdqpfgnnmeyygrsfslktlstieisgaaqpncqyaamdygqigqmvpqqnnenmfdynfeaapapaprkrrspktgvqkvamhantscincgcretklwrrnekgepecnpcnlyerfkgtkrpahlwnkptikrrrrpvaqvneapqvkedf	213
japonica	MED-1.1		Cjap.Contig17241	(319287..319446,319578..319857,320091..320223)	CJA03631b/exact	atggagaattatttttccgactcgccattcttcactccgctctatgcatattctgcgtttccctactgggaaaattactacgattacagtaatgcatatctacaaaattggaattttatggctgcgacaaacaatgtggcaatgtctgaaggattcatagacacatctcatccacaaaacccttcattagacgcctcgctattctggtcctcaccgactttcaccacgatgacgtcatcgccagcttctactttttccgaatcctctgcatccactcaagatttttcatcattcaacatggaaaactcaccgcagaatcgaaaacatcaagaatcttgtagtaaaaaatcggaaaattcaaaaaatcaaagatgttgcacaaattgtcaaactacaaaa…	menyfsdspfftplyaysafpywenyydysnaylqnwnfmaatnnvamsegfidtshpqnpsldaslfwssptfttmtsspastfsessastqdfssfnmenspqnrkhqescskksensknqrcctncqttktcrwrnvttrvlcnacfvytrkyhkprpstaviayhsrvqsdgkmkhsqksnnynapy	191
japonica	MED-1.2		Cjap.Contig17241	complement(312226..312358,312563..312842,312972..313131)	CJA05201/exact	atggatcataatttatccgactcgccattcttcactccactctatccatattctgagtttccctactgggaaaattactacgattacagtaatgcatatctacaaaattggaattttatggctgtgacaaacaatgtggcaatgcctgaaggattcatagacacatctcttccacaaaacgattcattagacgcctcgctattctggtcctcacccactttcaccacgatgacgtcatcgccagcttctactttttccgaatcctctgcatccactcaagatttttcatcattcaacacggaaaactcaccgcagaatcaaaaacatcaagaatcttgtagtaaaaaatcggaaaattcaaaaaatcaaagatgttgcacaaattgtcaaactacaaaa…	mdhnlsdspfftplypysefpywenyydysnaylqnwnfmavtnnvampegfidtslpqndsldaslfwssptfttmtsspastfsessastqdfssfntenspqnqkhqescskksensknqrcctncqttktcrwrnvttrvlcnacfvytrkynkprpstaviayhsrvqsdgkiknsrkakncngpy	191
japonica	MED-1.3		Cjap.Contig17241	complement(308393..308525,309135..309416,309516..309679)		atggagcagaatgtttccgactcgtcgttctttactccactttatccatattctgcagttctctactgggaaaattactacgattaccgtaatgcatatctacaaaattggagttttatgactaccacaaacaaagtggcaatgcctgaaacattcataggtactcccagttttcagacacatctcttccacacaacccttcatttgacgcctcgctattctggtcctcaccgactttcaccatcaccagtttctacgttttccgaatcctcggcatctactccagatttttcatcattcatccgagaaaactcatcgcaaactacaaaagatctagaagcttgtagcaaagaatcgggtaaatcgaaaaatcaaagatgttgctcaaattgtcaaact…	meqnvsdssfftplypysavlywenyydyrnaylqnwsfmtttnkvampetfigtpsfqthlfhttlhltprysgphrlspspvstfsessastpdfssfirenssqttkdleacskesgksknqrccsncqttktcrwrnvttrvlcnacfvytrkynkprpstaviayhsrvqsdgkmknsrkennfsgpy	193
japonica	MED-1.4	pseudogene	Cjap.Contig3845	complement(6558..6692)		gcatgtttcgtctacacccgaaaataccataaaccacggccgtcctcagcggtgatcgcctaccaatctcgagtgcaaagtgacggaaaaatgaaaaacagccggaaaacaaagaagagttatagtggtccgtactaa	acfvytrkyhkprpssaviayqsrvqsdgkmknsrktkksysgpy	45	fragment of sequence, only the basic domain after the C4 zinc finger, matches other 3 well
japonica	END-1		Cjap.Contig17885	(70232..70484,70534..70748,70803..70903,71118..71223)	CJA01519a,b,c/partial (they have an intron at the end + more coding)	atgtaccccgcatcttctccctcgtcatccgagtcgaccaacaatcagaattgctacgcgtacgctgtctggaaggatggagttttgcatccgcaagttatgcaattttcgcaaagtcatggaaatccgacgcccgacgaggagtttgcgcagcaggctggcgaaaatttgaatttcgcggaaaatgtggcgaatcagtataatccgatgatggagcaggcgatgttttacgaagagtttggacaatattttaccatgcccatgtataatgttgcacccattcacccgccgccgccaccaccaccaccacacgagcactcctcaatgtttggaagcatcgatcagaatgctcagcccactggatacgtgcagtacggtatggagccgcaaaattattgt…	mypasspsssestnnqncyayavwkdgvlhpqvmqfsqshgnptpdeefaqqagenlnfaenvanqynpmmeqamfyeefgqyftmpmynvapihpppppppphehssmfgsidqnaqptgyvqygmepqnycvdadkenvpvkaresrraapvkktsnfhrnsqcsnpncgtrettlwrrteqgavecngcslyyrkngvqrpaelcqkaimrrnrrprvsnvl	225
japonica	END-3.1		Cjap.Contig17820	(78423..78786,78830..79025,79078..79210)	CJA12475/partial (they have 17 extra aa's up front)	atgtactattcaccgaccacaccagtccatttgactagctaccctaatgaaatgggagccatctattacactgattctctccattctgctgaccagtctcaatgtctgaatccgattcacgatccgacatcattgtttgccattgaaaacaatactttaaataattgtgatcgcttgatgtatcaggatccttttgaatacaacaatccaattgtcgagaattcgggatactacggtattcggaactattctcaatttgaaatccctccttcgtatcattacccttttgtgtcaaacgaagaatcttcaagttggaacccaaattatggaaagccacttaattcttctccttcacagttttatgattcgccgcaacaacttcaatcttttgctgtgtct…	myyspttpvhltsypnemgaiyytdslhsadqsqclnpihdptslfaienntlnncdrlmyqdpfeynnpivensgyygirnysqfeippsyhypfvsneessswnpnygkplnsspsqfydspqqlqsfavsfppsrpsnkitkksekvakvrktskmhqntccsncgisettlwrrseiglpecnacntyervkghkrpaelwnkptmkrrrrplakveqktlcgegfn	231
japonica	END-3.2		Cjap.Contig17820	(153388..153751,153796..153991,154041..154134)	CJA15985/partial(they stop before basic domain)	atgtactgtccaccaacatcagacatttcttccactagctaccctactgaaatgggagccatctatcagaccgactctctcaattcttcttaccagtctcagtgtctgaatccaattcatgatccgacatcatcgtttaccattgaacacaataatttaaattattgtgatcgcttgatgtatcaggatccttttgaatacaacaatccaattgtcgaaaattcgggatactacggtattacgaaccattctcattttgaaatccctccttcgtatcatcatcctcttgtgtcaaacaacgaatcttcgagttggaacccaaattatggagaaacactcaactattttccttcacagttttatgataccccacaacaatttccatctcctgccgtatct…	mycpptsdisstsyptemgaiyqtdslnssyqsqclnpihdptssftiehnnlnycdrlmyqdpfeynnpivensgyygitnhshfeippsyhhplvsnnessswnpnygetlnyfpsqfydtpqqfpspavsfptvrpsekivkksekvgkvrkaskmhqntcctncgigkttlwrrsesglpecnacntyervelgygpiqhrymnkskrffpnmn	218	shortened basic domain?
japonica	END-3.3	pseudogene	Cjap.Contig3157	(184..377,427..556)	CJA35107/partial, CJA15985/partial	accccacaacaatttccatctcctgccgtatcttttccgacagtccggccgtctgagaaaatagttaaaaaatcagaaaaggtgggtaaagttcggaaggcatcaaaaatgcatcagaacacctgctgtaccaattgtggaattggcaagacaactttgtggcggagaagtgaatcaggacttccagagtgcaacgcttgcaacacttatgaacgtgtgaagggacacaaacggcctgcagagctttggaacaaaccgacaatgcagagaagacgtcgcccacttgccaaaatcaatgagaagacgtcaggtggagaagataaatga	tpqqfpspavsfptvrpsekivkksekvgkvrkaskmhqntcctncgigkttlwrrsesglpecnacntyervkghkrpaelwnkptmqrrrrplakinektsggedk	108	identical overlap to END3.2, probably a sequencing artifact - end of contig
kamaaina	MED-1.1		CKAMA.scaffold603_cov35	complement(9743..10204)	CKAMA.g6075.t1/partial, they miss the first 4aa shared with start of MED1.2	atgttcaacccaatgtatccttccactgctcctttgtttccgaatattatggagacgtactacgactacctcaactacttctccactcctcagtcgacgtcttcatttggaatctatccattcacatctattcctcaatctaacgtcttctggacgcctcctcccgaggctcccggaccatcttctccaggatacattgaagtgacgtcttctgaatctcctccaacgccttctgaaccttctccaacgacgtcttctactcctccaacctccaagtccaccagaatctgccggagctgtgccgccacgtccacatgtcaatggagaagtctccgctcgaaagagggtcctttatgcaatgcgtgtttcatttatcaacgaaaatacaaaaagtcgaga…	mfnpmypstaplfpnimetyydylnyfstpqstssfgiypftsipqsnvfwtpppeapgpsspgyievtssespptpsepspttsstpptskstricrscaatstcqwrslrskegplcnacfiyqrkykksrptkavehykarksdaapysrk	154
kamaaina	MED-1.2		CKAMA.scaffold603_cov35	(10511..10963)	CKAMA.g6076.t1/exact	atgttcaatccaactgctcctttatttccgaatgttatggagacgtactacgactacctcaactacttctccactcctcagacgacgtcttcatttggaatctatccattcacttctattcctcaatctaacgtcttctgtacgcctcctctcgaggctcccgggccatcctcacctggttacattgaagtgacgtcttctgaatctcctccaacgccttctgaaccttctccaacgacgtcttctactcctccaacctccaagtccaccagaatctgccggagctgtgccgccacgtccacatgtcaatggagaagtctccgctcgaaagagggtcctttatgcaatgcgtgtttcatttatcaacggaaatacaaaaagtcaagaccgaccaaggcc…	mfnptaplfpnvmetyydylnyfstpqttssfgiypftsipqsnvfctppleapgpsspgyievtssespptpsepspttsstpptskstricrscaatstcqwrslrskegplcnacfiyqrkykksrptkavehykarksadsspysrk	151
kamaaina	END-1		CKAMA.scaffold550_cov40	(452620..452851,452901..453073,453525..453625,453672..453771)	CKAMA.g5672.t1/exact	atgtacccatcttcatcatcttcatcgtctacatcttcatcttcttcttccccaccgacagctccatatacgtatggaattattgacaagaatggagttctacattctcacgaaatgcatttctctcaaaatcatggaaatccttcgcctattcagtctaacggcggataccaaacagctccagttcactatgtagtcgatcaataccacgaagactttggacagtattttgttcatccatatcttccagcccaaccagtcacccaaattcatccaatgtttggcagttttgatgtgtcaaattattctcaacaatatcctcaagtcggacagaattatagaattgaggaagaagaaccagaacaagaaagtccgccagtctcaaggaagagttcctcg…	mypssssssstsssssspptapytygiidkngvlhshemhfsqnhgnpspiqsnggyqtapvhyvvdqyhedfgqyfvhpylpaqpvtqihpmfgsfdvsnysqqypqvgqnyrieeeepeqesppvsrkssskkpstyhrnsvcsnpncgtrettlwrrtdnggiecngcslyfrkngvqrpaelcnkvimkrnrrprrdv	202
kamaaina	END-3.1		CKAMA.scaffold3960_cov41	complement(16297..16402,16458..16552,16604..16800,16848..17085)	CKAMA.g13700.t1/exact	atgcactcttctacgtcgtcttcttacgtcttttccaactatgcatattcaactcagcagcctttggtggagatgactactccaagcccgatgatggcacaaggagcatacaatactccttcgccacaactggattatctacactgtaatcaataccctaactatcaactcccttatgaccagcaccaattcagttccaatggatgtttctatggaatgaatcagactgactttcaaggacagtatcaaactgcggactattgctcagtgccgtcagcagaacttcaaactcaaagccccattctcaactttgagtgtactggcgtctatcaagaatcagccatcaatccacaagtatttgggcttgaatctgcaacaaccacggaggagccccgcggt…	mhsstsssyvfsnyaystqqplvemttpspmmaqgayntpspqldylhcnqypnyqlpydqhqfssngcfygmnqtdfqgqyqtadycsvpsaelqtqspilnfectgvyqesainpqvfglesattteeprgtkrkqtknrvkkvskmhlntqcshcgtretkmwrrnenglpecnpcnlyerlkgekrpehlwnkpsakrkrrpvapstf	212
kamaaina	END-3.2		CKAMA.scaffold3960_cov41	(14971..15208,15256..15452,15504..15598,15654..15759)	CKAMA.g13699.t1/exact	atgcactcttctacgtcgtcttcttacgtcttttccaactatgcatattcaactcagcagcctttggtggagatgactactccaagcccgatgatggcacaaggagcatacaatactccttcgccacaactggattatctacactgtaatcaataccctaactatcaactcccttatgaccagcaccaattcagttccaatggatgtttctatggaatgaatcagactgactttcaaggacagtatcaaactgcggactattgctcagtgccgtcagcagaacttcaaactcaaagccccattctcaactttgagtgtactggcgtctatcaagaatcagccatcaatccacaagtatttgggcttgaatctgcaacaaccacggaggagccccgcggt…	mhsstsssyvfsnyaystqqplvemttpspmmaqgayntpspqldylhcnqypnyqlpydqhqfssngcfygmnqtdfqgqyqtadycsvpsaelqtqspilnfectgvyqesainpqvfglesattteeprgtkrkqtknrvkkvskmhlntqcshcgtretkmwrrnenglpecnpcnlyerlkgekrpehlwnkpsakrkrrpvaqstf	212
kamaaina	END-3.3	pseudogene	CKAMA.scaffold26100_cov90	complement(10..206,254..491)	CKAMA.g19313.t1/exact	atgcactcttctacgtcgtcttcttacgtcttttccaactatgcatattcaactcagcagcctttggtggagatgactactccaagcccgatgatggcacaaggagcatacaatactccttcgccacaactggattatctacactgtaatcaataccctaactatcaactcccttatgaccagcaccaattcagttccaatggatgtttctatggaatgaatcagactgactttcaaggacagtatcaaactgcggactattgctcagtgccgtcagcagaacttcaaactcaaagccccattctcaactttgagtgtactggcgtctatcaagaatcagccatcaatccacaagtatttgggcttgaatctgcaacaaccacggaggagccccgcggt…	mhsstsssyvfsnyaystqqplvemttpspmmaqgayntpspqldylhcnqypnyqlpydqhqfssngcfygmnqtdfqgqyqtadycsvpsaelqtqspilnfectgvyqesainpqvfglesattteeprgtkrkqtknrvkk	145	fragment on tiny scaffold, likely allele of one of the others
nouraguensis	MED-1.1		CNOUR.scaffold247	complement(48932..49025,49072..49559)	CNOUR.g15453.t1/exact	atggactcgtacgtctcgatcgtctctccgatgtatccgtctgctgatccaacgcctgccgatacctattcccaatggtgtgcctactactctactctcagccagctgccttctctcggattctccgatcttcccggatcatcttaccctcaactgtcaaatgatcctgccttctggaactcttcttccaactcaacggctacttcttcacctgcgagccccttcaactacactccactcttcactcctccagacctccaaccagctatcaccccgatgtacttcaacttccccggcctgcaaaacttctggacttcctgccccaacttcatcgctacaccttcaacttctactcctccggctccacccatccaacctgcaactccagtctcccgaccc…	mdsyvsivspmypsadptpadtysqwcayystlsqlpslgfsdlpgssypqlsndpafwnsssnstatsspaspfnytplftppdlqpaitpmyfnfpglqnfwtscpnfiatpststppappiqpatpvsrpvdrnsprtctncqvtetvrwrniktnvvcnacfvyerkykkcrpttaikkmqvrkdqatpy	194
nouraguensis	MED-1.2		CNOUR.scaffold247	complement(51396..51489,51536..52020)	CNOUR.g15455.t1/exact	atggactcgtacgtctcgatcgtctctccgatgtatccgtctgctgatccaacgcctgccgatacctattcccaatggtgtgcctactactctactctcagccagctgccttctctcggattctccgatcttcccggatcatcttaccctcaactgtcaaatgatcctgccttctggaactcttcttccaactcaacggctacttcttcacctgcgacacccttcaactactttccactctttactcctccagacttccaaccagcgatcaccccgatgtacaacttccccggcctgcaaaacttctggacttcctaccccaacttcatcgctacaccttcaacttctactcctccggctccacccatccaacctgcaactccagtctcccgacccgta…	mdsyvsivspmypsadptpadtysqwcayystlsqlpslgfsdlpgssypqlsndpafwnsssnstatsspatpfnyfplftppdfqpaitpmynfpglqnfwtsypnfiatpststppappiqpatpvsrpvdrnsprtctncqvtetvrwrnittnvvcnacfvyerkykkcrpttaikkmqvrkdqatpy	193
nouraguensis	MED-1.3		CNOUR.scaffold337	(160081..160559,160607..160715)	CNOUR.g17373.t1/exact	atggttcattctcgtgctgacattctctcaacgacgtcttcttttccagtcatggatccttctcatccctactcttctgctaccaccccagctgcaatgccatcagctatctcgtacctcgactggatttcctactactcccggaatcaacttgttacgcactatccaactactatgccggttgtccctggataccaagctgctccctacatctatccagccgtgtattacgtgctcccaacgcctacagttcctctaactccgctatctataccagtctacccgatagctcttattccaacaccaccatcggaaactctgtttccggtgtacccagctccacaagtgtctccagtcactcctgctcctcctatccaatccaaaataaaagaagagaag…	mvhsradilsttssfpvmdpshpyssattpaampsaisyldwisyysrnqlvthypttmpvvpgyqaapyiypavyyvlptptvpltplsipvypialiptppsetlfpvypapqvspvtpappiqskikeekkshvcsncastktcqwrnvtksnvlcnacfvyqnrhkktrpfqsirkkaetsshtkkadtssn	196
nouraguensis	END-1		CNOUR.scaffold531_1_136328	(25759..25984,26030..26193,26238..26338,26383..26542)	CNOUR.g21201.t1/exact	atgtactcctcttcgtcttcctcgtcttccgatctttcgccgtctgattcgacccctcgctactactacgactacgaaaaagacggtgtcaagcaccgggaggaaatgcatttcgcgccgaaccacggcaatccgtcgccgatcgcatcccccgacaacacgttctaccagcctgctcttgacatccaaccgtcccatttccacgatgacttcggacaatatttcatgaatccctcgttctttccggcagtccaacagactgaagagcaacagtttgtgccagctcatccgatgttcggcagtttcgacaccctctaccagtatccagtgactgagcacggaatcaaccaggaaaacgcactgatctcaagaaagagctcttcgaagaagctgtccaca…	myssssssssdlspsdstpryyydyekdgvkhreemhfapnhgnpspiaspdntfyqpaldiqpshfhddfgqyfmnpsffpavqqteeqqfvpahpmfgsfdtlyqypvtehginqenalisrkssskklstfhrdsmcsnpncgtrqttlwrrtdsgavecnacslyfrkngvqrpaelcnktilkrnrrpraeclpkqvdieplqsvqqngqls	217
nouraguensis	END-3.1		CNOUR.scaffold531_1_136328	complement(50194..50320,50365..50459,50521..50783,50828..51008)	CNOUR.g21209.t1/exact	atgtacccttcctcttctgccttctctccggacgactatccgatgccttactctccgaacatggtcccgaatggaaatccgccgatgcaacctgcggattaccctctccaacatcaacaatatctggttggtcaacaagatttcgggatgatgtaccctcatgctcaacaggttcctttcaatccagttcatcagaacatgcaaaatgactttggaatgaacatgccagtcaaccaaggatatgcccacaacgcggacccgttcggctacactcagaacatgctcccagcgttccccgactacttcgccgccgttccatacaccgatcccaatcagttttcttcttccaacggccaccctatcaacactccgcctccgactttccaggattactctgga…	mypsssafspddypmpyspnmvpngnppmqpadyplqhqqylvgqqdfgmmyphaqqvpfnpvhqnmqndfgmnmpvnqgyahnadpfgytqnmlpafpdyfaavpytdpnqfsssnghpintppptfqdysgqeniskkmkknkekkmstmhlntscsncgvretklwrrneqgepecnacnlyfrmkgvarpqnlwnkptatrkrrpmapiadeiqednq	222
nouraguensis	END-3.2		CNOUR.scaffold531_1_136328	(59505..59685,59731..60026,60078..60172,60217..60343)	CNOUR.g21212.t1/exact	atgtacccttcctcttctgccttctctccggacgactatccgatgccttactctccgaacatggtcccgaacggaaatccgccgatgcaacctgcggattaccctctccaacatcaacaatatctggttaatcaacaagattttgggatgatgtaccctcatgctcaacaggctcctttcaatccatgttcccaaaacatgcagagtggctatggaatgaactttccaggcaaccaaggctatgcctacaacacggttccgtgtcactacgatcatcacatgtcgacagcaattccgaactcaatggacttctccgccaccgtcccgtaccccgatcccaacctgtactcttcttccaacaactttccgatcaatactccgaacccgaatttcggcaat…	mypsssafspddypmpyspnmvpngnppmqpadyplqhqqylvnqqdfgmmyphaqqapfnpcsqnmqsgygmnfpgnqgyayntvpchydhhmstaipnsmdfsatvpypdpnlysssnnfpintpnpnfgnfapfsvenqenishvsgkmkrkkekkmstmhrntscsncgtretaewrrnergepecnacnqyfgkkgvarpqnlwnkptatrkrrptapianenqednq	233
becei	MED-1.1		CSP29.scaffold30958_cov147	(45356..45840,45889..45982)	CSP29.g20020.t1/exact	atggactcgtacgtctcgaccgtctctccgatgtatccgtctgctgatccaacgccttccgatacctatttccaatggtatgcctactactcttctctcaaccagctgccttctctcggatccactggtccttcctaccctcaacttccacatgatcctgccttttggagcacctactcgacgacttctccagcgtcttcgtccgcaagtcccttcagctacactccggtctccacccctccagccttccaaccagccaacaccccgatgtccttccctggatcgcagaacttctggacttcctaccccagcttcatggctactcctccactcacctctcctccttctctacccagtcaacctccagctactccagtctccagacccactgatgagaag…	mdsyvstvspmypsadptpsdtyfqwyayysslnqlpslgstgpsypqlphdpafwstysttspasssaspfsytpvstppafqpantpmsfpgsqnfwtsypsfmatppltsppslpsqppatpvsrptdekttkgdfictncqvtetvrwrnirtnvlcnpcfvykrkykkcrpttaiqkmqarkeqaapy	193
becei	MED-1.2		CSP29.scaffold30718_cov179	(188816..189432,189480..189573)	CSP29.g16774.t1/exact	atggactcgtacgtctcgatcgtctctccgatgtatccgtctgcttatccaacgccttccgatacctatttccaatggtatgcctactactctactctcaaccaactgccttctctcggatccattggtccttctttccctcaacttccacatgatcctgccttctggagcacctactcttccccagcttctacatccgcgagtcccttcaactacactccagtctccactccttcaccagcaatcaccccgatgtccttcaacttccctggatcccagaacttctggagcacctactcgaacataccgacttcttcagcttcttcgtccgcgagtcccttcagtttcactccgatttccacccctccagccttccaaccagcaatcactccgatgccc…	mdsyvsivspmypsayptpsdtyfqwyayystlnqlpslgsigpsfpqlphdpafwstysspastsaspfnytpvstpspaitpmsfnfpgsqnfwstysniptssasssaspfsftpistppafqpaitpmpfnfpgsqnfwstypsfvatppltsppapptqppatpvsrpsdkktatgefictncqvtetirwrnirtnvlcnpcfvyerkykkcrpttaiqkmqarkeqaapy	237	duplication of 47aa in the middle makes the protein longer
becei	MED-1.3		CSP29.scaffold275_cov148	complement(112565..112658,112706..113433)	CSP29.g6902.t1/exact	atgaactcgaacgtcccgatcgtctctccgatgttgctgtctgcaaatccaacgccttcgaatacctatctccaatggtatgcctactactctactctcaatcaacttcctcctctcggatccactggtcctttcttccctcaactgccacatgatcctgccttctggaacagttacttgaacaacacgacttctccagcttcttcttctgcgagtcccttcaactacactctggtccccactcttccacctgcgatcatcccaatgttcctcaacgtccctggattgcagaacttctggagttccaaccccagcttcatggctactccttcactcaccactcctccagctctacccactcaacctccagctctacttactcaacctccagctctactt…	mnsnvpivspmllsanptpsntylqwyayystlnqlpplgstgpffpqlphdpafwnsylnnttspasssaspfnytlvptlppaiipmflnvpglqnfwssnpsfmatpslttppalptqppalltqppalltqppalptppalpiqppalptqppalptqppalptppalptqppalptqppalptppalptppalptqppatpvssptnkktakggfictncqatetvqwrnirtnvlcnpclvykrkykkcrpttaiqkmqakkdqaapy	274	13 repetitions of a protein sequence PPALPTQ or PPALPIQ or PPALPT lengthens protein
becei	MED-1.4		CSP29.scaffold7019_cov147	complement(603486..603573,603622..604157)	CSP29.g15464.t1/exact	atggatccttcctattcctactattctgctgatggtaccacttctgatgtgtactcttcgtacctagactggacatcctactactctcagaaccaactagcaccgtactaccccactgctgctaccattccggttctccctgaacgccaagctgcttcagttccaacccataactattccgatggctactggaacacttacccaaccgagtactacccactcccttctccgtcattttcctcgactccactcgcttcgcccatgtacccgatgactcctgctccaacaacgacttcatctggaacaccttcccccatctacccaatcactcctactccaccagcaacgacttcaacacctggaactccatctctcatctacccacctccgcaaccgtcg…	mdpsysyysadgttsdvyssyldwtsyysqnqlapyyptaatipvlperqaasvpthnysdgywntypteyyplpspsfsstplaspmypmtpaptttssgtpspiypitptppattstpgtpsliypppqpssvtpaprmltkreaqrekkkslvctncattetcrwrniskpnvlcnscfvyknkykktrpfqtlrntkkadtppc	208
becei	END-1		CSP29.scaffold709_cov177	complement(951602..951761,951810..951910,951954..952114,952160..952379)	CSP29.g10126.t1/exact	atgtactcctcgtcgtcttcctccgatccttcgccgtccgattcgacgcctcactactactacgagtacatgaaagatggtgtcgtgaagcgggaggagatgcatttcggcccgaaccacggcaatccgtcgcccatcgcatcgcccgataactcgctctaccagccagctctcgacatccaacacgccagttaccaagaagatttcggacagtatttcatgaactccttcattccgacaccccaacaacaactcgaagagcaacactttgtgccagctcatccgatgttcggaaactttgacaccctctaccagtatcctgtggttgaagcgatcaatcaggagaacaaaccgattccgagaaagagttctgcgaagaagccgtccacattccatcgc…	myssssssdpspsdstphyyyeymkdgvvkreemhfgpnhgnpspiaspdnslyqpaldiqhasyqedfgqyfmnsfiptpqqqleeqhfvpahpmfgnfdtlyqypvveainqenkpiprkssakkpstfhrnsmccnpncgtrqttlwrrtdsgavecnacslyfrknkvqrpaelcnktilkrnrrprveclpkpvdmqplqnvqqngqls	214
becei	END-3.1		CSP29.scaffold709_cov177	(927444..927627,927681..927761,927806..928065,928147..928241,928288..928426)	CSP29.g10118.t1/exact	atgtatccttcctcttctgccttctctccggacgactatccgatgccttattctcccaacatggtcccgaatggaaatccgccgatgcaaccgttggatttccctctccaacagcaacaatatgcagttaaccaacaaggattcgacatgatgtacccgcaggaacaaaaagttgctcctttcaatccagttccccagaacatgcagaatgactgcaaaccagatctcggaatgatgtatccacaggatcaacaggtccccttcaatcctcagaacatgccatttggaatgaatgttccattcgaccacggctatgcccacaacgcggacccattcgcctacgaccagaacatgctcccagggttcccgaatccaatggactacttcgccgccgtccca…	mypsssafspddypmpyspnmvpngnppmqpldfplqqqqyavnqqgfdmmypqeqkvapfnpvpqnmqndckpdlgmmypqdqqvpfnpqnmpfgmnvpfdhgyahnadpfaydqnmlpgfpnpmdyfaavpytdphqfassnglpintpppnfddysgqgsvsrkikknkekkmstmhlntscsncgvretklwrrnekgepecnacnlyfrmkgvvrpqnlwnkptatrkrrpmapvadenqvknegdnq	253
becei	END-3.2		CSP29.scaffold709_cov177	complement(917998..918136,918183..918277,918348..918607,918652..918753,918809..918992)	CSP29.g10115.t1/exact	atgtatccttcctcttctgccttctctccggacgactatccgatgcctttctctcccaacatggtcccgaatggaaatccgccgatgcaaccgttggatttccctctccaacagcaacaatatgcagttaaccaacaaggattcgacatgatgtacccgcaggaacaaaaagttgctcctttcaatccagctccccagaacatgcagaatgactgcaaaatgaatgttccagtcaaccaaccagatctcggaatgatgtatccacaggatcaacaggtcccctttcatcctcagaacatgccatttggaatgaatgttccattcgaccacggctatgcccacaacgcggacccattcgcctacgaccagaacatgctcccagggttcccgaatccaatg…	mypsssafspddypmpfspnmvpngnppmqpldfplqqqqyavnqqgfdmmypqeqkvapfnpapqnmqndckmnvpvnqpdlgmmypqdqqvpfhpqnmpfgmnvpfdhgyahnadpfaydqnmlpgfpnpmdyfaavpypdphqfassnglpintpppnfddysgqgsvsrkmkknkekkmstmhlntscsncgvretklwrrnekgepecnacnlyfrmkgvvrpqnlwnkptatrkrrpmapvadenqvknegenq	260
panamensis	MED-1		CSP28.scaffold806_cov79	(175119..175377,175424..175613,175656..175749)	CSP28.g14073.t1/partial-alternate splice no ZF	atggattcttccttgcccacagtctccactgtctccactccttctgttcccaccaacatggccctttcttatgctgcctcgtatctccagttgtattcctattatactcgacagaaccaacagttttcctacctgaactctgtgttgcaagtcggtggaaacatgagtaactccccgacaacttccggttcacttcccacagatccagaacctttgaagctgactggctggaacggattgtcatttccaactgcactggacagttcctcctcttttccatcaacttcttctactcacaactcttctcctgtctccacttcttcgtctactccatcaaccgcaccgagcatcccgaaacagagaaaaagcaaaacgaagatctgcacaaattgcatggcc…	mdsslptvstvstpsvptnmalsyaasylqlysyytrqnqqfsylnsvlqvggnmsnspttsgslptdpeplkltgwnglsfptaldssssfpstssthnsspvstssstpstapsipkqrksktkictncmatetckwrnvkkqnvmcnacfvyerkykksrpegttnkkkttdsknspn	181
panamensis	END-1		CSP28.scaffold70_cov80	(146721..146961,147006..147175,147217..147317,147364..147520)	CSP28.g5589.t1/exact	atgtacccctcttcctcgacctcgtcttcgtcttcgtcctccaatcactgttctcctactaatccgtctacccaatacttttacgagtaccagaaagatggagtcaagtatcgcgaggaaatgcactttggtcccaaccacggcaacccgtctcccatcgaatccccggataacacctactatccggctttcgatgtctcgcagcctacagagttccacaatgactttggacagtactttgtcaactcagccaactcctacattcccccaagccaccaacagttcgctccaactcaatcaatgttcggtagcttcgacgccacctaccagtcctatccaagcatcccagagctcaaagtcaatcaggagaacaattcgggctttgcctctaggaaaagt…	mypssstsssssssnhcsptnpstqyfyeyqkdgvkyreemhfgpnhgnpspiespdntyypafdvsqptefhndfgqyfvnsansyippshqqfaptqsmfgsfdatyqsypsipelkvnqennsgfasrksgpkkpsifhrnsvcsnpscgtrettlwrrtdagaiecnacslyfrknhiqrpaelcnktilkrnrrpraecvtknngqplqdmllnaqlp	223
panamensis	END-3.1		CSP28.scaffold70_cov80	complement(170984..171104,171152..171246,171292..171590,171636..171870)	CSP28.g5597.t1/missing upstream with polyS	atgtacccttcctcttcttcttcctctggctattctttctcttcccaatcggataattcttctggtttctctacctctatgtcttattctaatcagtatggaaacatggttccaactggtaattcaccaatgcaacaagtagccttctctcaacaccagtaccaataccaataccctgtctccaacaacaacttcgctgcaatgtacacggataatcaacaaccggctgtcttcaataacggcaatcaaactgttcaagctttcatggcatacaatcacaatggccaagtcaataatgacctcgctcagaacttcaattccttcggatgcaactacgatcagatgacgaacaccttcatccagaacccagctgttactccattgggaacacagaatctt…	mypssssssgysfssqsdnssgfstsmsysnqygnmvptgnspmqqvafsqhqyqyqypvsnnnfaamytdnqqpavfnngnqtvqafmaynhngqvnndlaqnfnsfgcnydqmtntfiqnpavtplgtqnlqvldpnqfsyqnglpitsdtmdfnnysgnqkenvprkmrskktkkpstmhlntscsncgtrdtklwrrteqgepecnpcnlfsrskngakrpqhlwnkptatrkrrpmaqqvaesnq	250
panamensis	END-3.2		CSP28.scaffold70_cov80	(180453..180681,180727..181025,181071..181165,181213..181369)	CSP28.g5600.t1/missing upstream with polyS	atgtacccttcctcttcttcttcctctggctattctttctcttcccaatcggataattcttctggtttctctcctgctatgtcttattctaaccagtatggaaacatggttccaactggtaattcaccaatgcaacaagtggccttctctcaaccccagtaccaataccctgtctccaacaacaacttcgctgcaatgtacacggataatcaacaaccggctgtcttcaataacggcaatcaaactgttcaagctttcatggcatacaatcacaatggccaagtcaacaatgacctcgctcagaacttcaataccttcggatacaactacgatcagatgatgaacacctttatccagaactcagctgttactccattgggaacacagaatcttccagtg…	mypssssssgysfssqsdnssgfspamsysnqygnmvptgnspmqqvafsqpqyqypvsnnnfaamytdnqqpavfnngnqtvqafmaynhngqvnndlaqnfntfgynydqmmntfiqnsavtplgtqnlpvidpnqfsyqnglpitsdtmdfnnyssnqkenvprkmrskktkkpstmhlntscsncgtrdtklwrrteqgepecnpcnlysrskngakrpqhlwnkptatrkrrpmvqqvadsnrlwesinnsisdq	260
waitukubuli	MED-1.1		CSP39.scaffold13214	(4465..5006,5061..5148)	CSP39.g21518.t1/they add two in-frame read-through introns	atggattctttccttccaactgtctctgctcctgttccagcagttgatttgagttcaccttactctacctcctacttccagtggtattcctattactccggtctgaatcagcagatgtcctatctggattctagtatgttgggaacaagtgaatctgtgagtgcccttccaaacctcccctttcccacttatactcctctagattcctcgaatctttcctcctggaatggctactcgtacccaactgacttcagtccctctccagtttcctatgaactgactcctctcggtaagtgtctttctctcttttctcagctaattccagttcttccagacagtcctaacttctcttctccgtcgacttccaccgtctctccagtttttccatcttcagttaaa…	mdsflptvsapvpavdlsspystsyfqwysyysglnqqmsyldssmlgtsesvsalpnlpfptytpldssnlsswngysyptdfspspvsyeltplgkclslfsqlipvlpdspnfsspststvspvfpssvkltpppetapatapetgkktakkdlictncmatetakwrnvrkvnvlcnacfvyerkykrcrplgttnrkknantdpy	210
waitukubuli	MED-1.2		CSP39.scaffold11123	(4445..4986,5041..5128)	CSP39.g19184.t1/they add two in-frame read-through introns	atggattctttccttccaactctcccttctcttcccccagttccaccagtcgatttgagttcaccttactctgcctcctacttccagtggtattcctattactccggtctgaatcagcagatgtcctatatagattctagtatgttgggaacaagtggatctgtgagtgcccttccaaacctcccctttcccacttatactcctctagattcctcgaatctttctgcctggaatggctacttgtacccaactgacttctctccagtttcctatgaactgactcctctcggtaagtgtctttctctcttttctcagctaactctagttcttccagatagtcctaacttctcttctccgtcgacttccaccgtctctccagttttcacatctccagttcaa…	mdsflptlpslppvppvdlsspysasyfqwysyysglnqqmsyidssmlgtsgsvsalpnlpfptytpldssnlsawngylyptdfspvsyeltplgkclslfsqltlvlpdspnfsspststvspvftspvqltpppetapattpktgkkiakkdlictncmatetakwrnvrkvnvlcnacfvyerkykrcrplgttnrkknsntdpy	210
waitukubuli	MED-1.3	pseudogene	CSP39.scaffold10663	(3..67,122..209)		acgaattgcatggccacagagactgcgaaatggaggaatgtgagaaaagtgaatgtgctttgcaatgcctgcttcgtctacgaacggaaatacaaaagatgccgtccacttggaacaactaacagaaagaagactgccaacactgacccatactaa	tncmatetakwrnvrkvnvlcnacfvyerkykrcrplgttnrkktantdpy	51	fragment of sequence, matches 1.1 and 1.2 well
waitukubuli	MED-1.4	pseudogene	CSP39.scaffold20226	complement(14..555)	CSP39.g29172.t1/they add two introns	atggattctttccttccaactgtctctgatcctgttccagcagtcgatttgagttcaccttactctgcctcctacttccagtggtattcctattactccggtctgaatcagcagatgtcgtgtctggattctagtatgttgggaacaagtggatctgtgagtgcccttccaaacctcccctttcccacttatactcctctagattcctcgaatctttctgcctggaatggctacttgtacccaactgacttcagtccttctccagtttcctatgaactgactcctctcggtaagtgtctttctctcttttctcagctaattcgagttcttccagatagtcctaacttctcttcttcgtcgacttccaccgtctctccaattttcacatcttcagctcaa…	mdsflptvsdpvpavdlsspysasyfqwysyysglnqqmscldssmlgtsgsvsalpnlpfptytpldssnlsawngylyptdfspspvsyeltplgkclslfsqlirvlpdspnfsssststvspiftssaqltpppeaapatapatgkktakkdlictncmatetakwrnvrkvnvlc	180
waitukubuli	END-1		CSP39.scaffold18937	complement(4727..4895,4944..5044,5101..5282,5328..5562)	CSP39.g27819.t1	atgtacccgtcttcattctcttcttcctcgtcttccaatgagtgttccactcccaattccactactcaatacttctacgaataccagaaagacggagtgaagtatcgcgaagaaatgcactttggcccgaatcacggcaatccgtcgccagtcggaacccccgataacacactttatcagtcggttctggagcagcaaccgacccatttctacgatgactttggacagtactttgtcaatccgtacatccctcccggacaacagcaacagccacaaccagttgctcctcaatctatgttcggaagtttcgatccgaacaccatcaatgtctaccagccatacacggattttccagaactgacaccatccactttccatcggaactcaatgtgctccaat…	mypssfssssssnecstpnsttqyfyeyqkdgvkyreemhfgpnhgnpspvgtpdntlyqsvleqqpthfyddfgqyfvnpyippgqqqqpqpvapqsmfgsfdpntinvyqpytdfpeltvnqenkpipssrrngpkkpstfhrnsmcsnpscgtrqttlwrrtdagavecnacslyfrkngvqrpaelcnktilkrnrrprvectakrtehgvqalqnvlqngqqll	229
waitukubuli	END-3.1		CSP39.scaffold10057	(2646..2967,3056..3171,3220..3314,3366..3498)	CSP39.g17976.t1/partial - they have a different upstream, longer; also g17974 partial	atgtacccgtcttcttcttcttctttctcttcttctggatattcgacgccttctcaatcttcttctggtttctcaactgagattccttgtttcgaccagtacggaaacatggtctcgactgaaaatccagtcatgcaactcgtggattacactcttcttccactcgactatgcactttccaacaatgaattcggaggagtcgcatacacggggaaaccgggtcagggagcagttccagtcgttcagtttcagttttccatacctcaatcaacttattttttcagatcaagtcatccagaatttcagagactacggattgaatttgtcgatgcattcccgtactttgccggtgttccaatcaacactcctccaaacactttccctgatgatccacaagag…	mypsssssfsssgystpsqsssgfsteipcfdqygnmvstenpvmqlvdytllpldyalsnnefggvaytgkpgqgavpvvqfqfsipqstyffrsshpefqrlriefvdafpyfagvpintppntfpddpqeniprkkrvskmkkvstmhlntvcsncgtretklwrrteqgepecnpcnlyfrmkngvkrpphlwnkptatrkrrpmvvaavesdiennh	222
waitukubuli	END-3.2	pseudogene	CSP39.scaffold10057	(2..136)	CSP39.g17974.t1/partial; they have an upstream region, from cDNA?	ccgtgcaatctgtatttccgaatgaagaacggagtcaagagaccgccgcatctgtggaacaagccgactgcgaccagaaagagacgaccgatggttgtggcagccgtcgagtcggatatcgagaacaagctctactga	pcnlyfrmkngvkrpphlwnkptatrkrrpmvvaavesdienkly	45	contig starts with last exon, partial gene
waitukubuli	END-3.3		CSP39.scaffold02444	complement(49358..49493,49546..49801,49859..50183)	CSP39.g9792.t1/partial - they have two extra introns and different upstream, longer	atgtacccgtcttcttcttcttctttatcttcttctggatattcgacgccttctcaatcttcttctgctttctcaactgatattccttgttttgaccagtacggaaacatggtctcgactggaaatccagtggtgcaacacgtggattacactcatcttccactcgaatacgcactttccaacaatgaattcggaggagtcggtcagtttcggtcagtttcagttttccatacctcaatcaacttccttttttcagatcaagacatccagaatttcggggactacggattgaatgtgaacatgaactttgataagttcggcaacattgtcgatgcattcccgtactttgccggtgttccaatcaacactcctccaaacactttccatgatgatccacaa…	mypssssslsssgystpsqsssafstdipcfdqygnmvstgnpvvqhvdythlpleyalsnnefggvgqfrsvsvfhtsinflfsdqdiqnfgdyglnvnmnfdkfgnivdafpyfagvpintppntfhddpqeniprkkrvskmkkvrreqgisgkriglqvstmhlntvcsncgtretklwrrteqgepecnpcnlyfrmkngvkrpphlwnkptatrkrrpmvvaavesdiennhy	239
waitukubuli	END-3.4	pseudogene	CSP39.scaffold02444	(59126..59365)	CSP39.g9795.t1/partial - they have additional sequence 3'	atgtacccgtcttcttcttcttcttcctcttcttctggatattcgacgccttctcaatcttcttctggtttctcaactgacattccttgtttcgtccagtacggaaacatggtctcgactggaaatccagtcatgcaacacgtggattacactcatcttccactcgaatacgcacttcccaacaataaattcggaggagtcgcgtacacggggattccaggtcagggagcagttccaatc	mypsssssssssgystpsqsssgfstdipcfvqygnmvstgnpvmqhvdythlpleyalpnnkfggvaytgipgqgavpi	80	well-conserved first part of END3, stops
waitukubuli	END-3.5	pseudogene	CSP39.scaffold05801	(482..721)	CSP39.g13585.t1/partial-they have additional upstream	atgtacccgtcttcttcttcttcttcctcttcttctggatattcgacatcttctcaatcttcttctggtttctcaactgagattccttgtttcgaccaatacggaaacatggtctcgactggaaatccagtcatgcaacacgtggattacactcatcttccactcgaatacgcactttccaacaatgaattcggaggagtcgcgtacacggggattcctgatcaggaagcagttccaatc	mypsssssssssgystssqsssgfsteipcfdqygnmvstgnpvmqhvdythlpleyalsnnefggvaytgipdqeavpi	80	well-conserved first part of END3, stops
afra	MED-1.1		CAFRA.scaffold00121	complement(744..849,907..1376)	CAFRA.g5094.t1/partial, has extra intron, longer upstream	atgaatccgtacttcccagctctcggcgactttccagccttcccactgcttccggtcacggagacacccgcgttcgacatatccggtctgctcggtgctgctccgattgctcctccggctcctgctactattcctgatccaatggtgatgtcctacgccgactactcggctcaatacctcgcatttggcattcaaggctggccagccactcagttccgtcttcctcactgtaagtttagctgcttctcgattctcgactctccgactaaccattactcatttccagaccccgatccaactccactgtcctctccagtgtctgtcactggtcccgtgacgcctccacctccacaacaacagcagcagcatcagaacctgccgacgaagaaggtccacggc…	mnpyfpalgdfpafpllpvtetpafdisgllgaapiappapatipdpmvmsyadysaqylafgiqgwpatqfrlphckfscfsildsptnhysfpdpdptplsspvsvtgpvtppppqqqqqhqnlptkkvhgytcshckatetckwrdvkthvkcnacfiyerkygksrptgaidaftvrggnkkkrstpy	192	possible additional intron that could also be read through
afra	MED-1.2		CAFRA.scaffold01438	(544.1001,1059..1164)	CAFRA.g15829.t1/partial, has extra intron	atgtcctacgccgactactcggctcaatacctcgcatttggcattcaaggctggccagccactcagttccctcttcctcactgtaagtttagctgcttctcgattctcgactctccgactaaccattactcatttccagaccccgatccaactccactgtcgccctggacgccgggaccgtcttctccaatctacacgaacctctccccgacgtcgtcctccatcggcaccgttcaatcgccaacgtcttccctgtcgggccacccgtcaggcactcccgcctcctcgaatggctcctctccagtgtctgtcactggtcccgtgacgcctccacctccacaacaacagcagcagcatcagaacctgccgacgaagaaggtccacggctacacgtgctcc…	msyadysaqylafgiqgwpatqfplphckfscfsildsptnhysfpdpdptplspwtpgpsspiytnlsptsssigtvqsptsslsghpsgtpassngsspvsvtgpvtppppqqqqqhqnlptkkvhgytcshckatetckwrdvktqvkcnacfiyqrkygksrptgaielftvrggnkkkrstpy	188	truncated amino end, possible in-frame intron
afra	MED-1.3		CAFRA.scaffold01571	(3086..3690,3743..3848)	CAFRA.g16809.t1/partial, has extra intron	atgaatccgtacttcccagctctcggcgactttccagccttcccactgcttccggtcacggagacacccgcgttcgacatgtccggtctgctcggtgctgctccgattgctcctccggctcctgctactattcctgatccaatggtgatgtcctacgccgactactcggctcaatacctcgcatttggcattcaaggctggccagccactcagttccctcttcctcactgtaagtttagctgtttctcgattctcgactctccgactaacctttgctcatttccagatcccgatccaactccactgtcgccctggacgccgggaccgtcttctccaatctacacgaacctctccccgacgtcctcttccaccggcaccgttccatcgccaacgtcttcc…	mnpyfpalgdfpafpllpvtetpafdmsgllgaapiappapatipdpmvmsyadysaqylafgiqgwpatqfplphckfscfsildsptnlcsfpdpdptplspwtpgpsspiytnlsptssstgtvpsptsslsghpsgtpassngsspvsvtgpvtppppqqqqqhqnlptkkvhgytcslckatetckwrdvktqvkcnacfiyqrkygknrptgaieaftarggnkkkravpy	237
afra	MED-1.4		CAFRA.scaffold00722	(176..780,833..938)	CAFRA.g10580.t1/partial, has extra intron	atgaatccgtacttcccagctctcggcgactttccagccttcccactgctcccggtcacggagacacccgcgttcgacatttccggtctgctcggtgctgctccgattgctcctccggctcctgctactattcctgacctggcaatgatgccctacgccgactactcggctcaatacctcgcatttggtgttcaaggctggccagccactcagttccctcttcctcactgtaagtttagctgcttctcgattctcgactctcccgctaacctttcctcatttccagaccccgatccaactccactgtcgccctggacgccgggaccgtcttctccaatctacacgaacctctccccgacgtcgtcctccatcggcaccgttccatcgccaacgtcttcc…	mnpyfpalgdfpafpllpvtetpafdisgllgaapiappapatipdlammpyadysaqylafgvqgwpatqfplphckfscfsildspanlssfpdpdptplspwtpgpsspiytnlsptsssigtvpsptssvscrpsgtpassngsspvsvtgpatppppqqqqqhqnlptkkvhgytcslckatetckwrdvktqvkcnacfiyqrkygksrptgaieaftvrggnkkkravpy	237	on a small contig that contains little more than just the gene
afra	MED-1.5		CAFRA.scaffold00108	(8804..9469,9522..9627)_has a frame shift this way, but the prediction puts an intron	CAFRA.g4602.t1/partial, they find an intron	atgaatccgtacttcccagctctcggcgactttccagccttcccactgctcccggtcacggagacacccgcgttcgacatgtccggtctgctcggtgctgctccgattgctcctccggctcctgctactattcctgatccaatggtgatgtcgtacgccgactactcggctcaatacctcgcatttggtgttcaaggctggccagccactcagttccctcttcctcactgtaagtttagctgcttctcgattctcgactctccgactaaccattactcatttccagaccccgatccaactccactgtcgccctggacgccgggaccgtcttctccaatctacacgaacctctccccgacgtcgtcctccatcggcaccgttccatcgccaacgtcttcc…	mnpyfpalgdfpafpllpvtetpafdmsgllgaapiappapatipdpmvmsyadysaqylafgvqgwpatqfplphckfscfsildsptnhysfpdpdptplspwtpgpsspiytnlsptsssigtvpsptssvscrpsgtpassngsspvsvtgpvtppppqqqqqhqnlppkkvhgytcslckatetckwrdvktqvkcnacfiyqrkygknrptgaieaftarggnkkkravpy	237	N' in middle of coding sequence in an odd direct repeat of 61 bp; these were removed (9224-9284) to make the ORF
afra	MED-1.6	pseudogene	CAFRA.scaffold01669	(436..969)	CAFRA.g17854.t1/partial, they truncate early	atgaatccgtacttcccagctctcggcgactttccagccttcccactgcttccggtcacggagacacccgcgttcgacatgtccggtctgctcggtgctgctccgattgctcctccggctcctgctactattcctgatccaatggtgatgtcctacgccgactactcggctcaatacctcgcatttggcattcaaggctggccagccactcagttccctcttcctcactgtaagtttagctgcttctcgattctcgactctccgactaaccattactcatttccagaccccgatccaactccactgtcgccctggacggcgggaccgtcttccccaatctacacgaacctctccccgacgtcgtcctccatcggcaccgttcaatcgccaacgtcttcc…	mnpyfpalgdfpafpllpvtetpafdmsgllgaapiappapatipdpmvmsyadysaqylafgiqgwpatqfplphckfscfsildsptnhysfpdpdptplspwtagpsspiytnlsptsssigtvqsptsslsghpsgtsassngsspvsvtgpatppppqqqqqhqnlptkkvhg	178	only first half of protein conserved, scaffold is small
afra	END-1		CAFRA.scaffold01780	(115797..116007,116057..116253,116300..116400,116452..116593)	CAFRA.g18615.t1/exact	atgtactcccagttctcctttgcgtcgacgtcttccgacgtcaccacgtcttctggatcgtcgtcacaggaccagaatgcggtcccgatgttctacgactacgtggacaaagaaggcgtcgtccataggcacgagatgcgcttttcggcgaaccacggcagaccggaaccggtgtccgattcgtttcaggaggatttcggtcagtacttcgttccatcggtcgcctacgtgcctccacagttgaccacgcctccttcgaattcgatgttcggaagcatggatccgtcgatggtctattctccgtttccagttcccgcttatcagttcaccccgtctccgctcggaaatcaggcatccaacttcaaagatttcaagaaggtcacttccacgaaaaagaaa…	mysqfsfastssdvttssgsssqdqnavpmfydyvdkegvvhrhemrfsanhgrpepvsdsfqedfgqyfvpsvayvppqlttppsnsmfgsmdpsmvyspfpvpayqftpsplgnqasnfkdfkkvtstkkktmkatsiqanyvcsnqncqtrettlwrrtengdrecnacclffrkngyarpaehcakkimrrhrrprtdtctdpaaptsslhke	217
afra	END-3.1		CAFRA.scaffold01780	(56025..56271,56315..56407,56452..56686,56734..56842)	CAFRA.g18581.t1/partial (they skip the lead with polyS)	atggattccttcttctcctcttcgtccacctcctcctcctcttcatcgtcagggaatgacttcatgtaccaccctccagatcaagtgttcgggacggcttctggacacattcaggcgaatgtcaagacagagccgtttccgattcaacacgacgacttcgaaactgcattccaggacgttgcgactcataccgattttccgcaagaagaacaaaaacatctggcacgcaatcaggatttcttttatgaccaacagcaagtcgttgctcaaaacacttatccgttccagccggctcaacatttccagaacgttttcccacaagacaacaatatgcacttttacaatcagccgtatccgcatcagatgggacacttcgtcgagcagccaataatgatgcag…	mdsffsssstsssssssgndfmyhppdqvfgtasghiqanvktepfpiqhddfetafqdvathtdfpqeeqkhlarnqdffydqqqvvaqntypfqpaqhfqnvfpqdnnmhfynqpyphqmghfveqpimmqqpfnqpredlkenvvgpikgrrrlqkkastlhtnssccncgtretkmwrrneqgepecnscnlyfrnkgvprpenlwnkptaqrrrrpvasvqrq	228
afra	END-3.2		CAFRA.scaffold01780	(63592..63838,63882..63974,64020..64254,64302..64410)	CAFRA.g18583.t1/partial (they skip the lead)	atggattccttcttctcctcttcgtccacctcctcctcctcttcatcgtcagggaatgacttcatgtaccaccctccagatcaagtattcgggacggcatctggacacattcaggcgaatgtcaagacagagccgtttccgattcaacacgacgacttcggaactgcattccaggacgttgcgactcataccgattttccgcaagaagaacaaaaacatctggcacgcaatcaggacttcttttatgaccaacagcaagtcgttgctcaaaacacgtatccgttccagccggctcagcattttcagaactacacccaagaggacaacaatatgcacttttacaatcagccgtatccgcatcagatgggacacttcgtcgagcagccaataatgatgcag…	mdsffsssstsssssssgndfmyhppdqvfgtasghiqanvktepfpiqhddfgtafqdvathtdfpqeeqkhlarnqdffydqqqvvaqntypfqpaqhfqnytqednnmhfynqpyphqmghfveqpimmqqpfnqpredleenvvgpikgrrrlqkkastlhanssccncgtretkmwrrneqgepecnscnlyfrnkgvhrpehlwnkptaqrrrrpvasvqrq	228
afra	END-3.3		CAFRA.scaffold01780	complement(67147..67255,67303..67528,67578..67670,67714..67957)	CAFRA.g18586.t1/partial (they skip the lead)	atggattccttcttctcctcttcgtccacctcctcctcctcttcatcgtcagggaatgacttcatgtaccaccctccagatcaagtgttcgggacgccttctggacacattcaggcgaatgtcaagacggagccgcacccgattcaacacgacgacttcgaaactgcattccaggacgttgcgattcataccgattttccgcaagaagaacaacatctggcacgcaatcaggatttcttttatgaccaacaacaagtcgttgctcaaaacgggtacccgtttcaaccggttcaacatttccagaacgttttcccacaggaaagcaatgggctttattacaatacgcatcagatgggacacttcgtcgagcagccaataatgatgcagcaaccgttcaat…	mdsffsssstsssssssgndfmyhppdqvfgtpsghiqanvktephpiqhddfetafqdvaihtdfpqeeqhlarnqdffydqqqvvaqngypfqpvqhfqnvfpqesnglyynthqmghfveqpimmqqpfnlqredikenvvgpikgrrrlqkkastlhanssccncgtretkmwrrneqgepecnscnlyfrnrgvprpehlwnkptaqrrrrpvapaqrq	224
sulstoni	MED-1.1		CSP32.scaffold01166	complement(5473..5581,5631..6124)	CSP32.g12775.t1/partial (they have extra intron)	atgaacccgtactttcctgcctaccccatgctgccggtcactcccgcggcgccattcccctacaatccaattctcgctccgatgtatccgtcgtactcggagtacactactcagctgctcggctcgaccaactacgagctcggagcgccggttccgatcccaaacctgtctttcccaaactgtaagctctggcttcctccatatcgagccaacgtcttcatcatttcagactctgctcccaatccgatgacaccgtggacctacgcgcactcttctccgtcgtcatccgccgaagccgtcccatccccgacgtcttcagcaggccactcatccggctacgaatcggccacaccgacgtcttcgagcggctcttcgtacagtcctccggctccgaagcca…	mnpyfpaypmlpvtpaapfpynpilapmypsyseyttqllgstnyelgapvpipnlsfpncklwlppyranvfiisdsapnpmtpwtyahsspsssaeavpsptssaghssgyesatptsssgssysppapkplapkskskytcsvckvtescrwrnlrsdvkcnacfiyerkyektrpdaaikafsmrggnrkkgavdpy	201
sulstoni	MED-1.2		CSP32.scaffold01951	(303..435,487..817,865..967)		atgtacccgtactgctctgcctactctcctatatctgtcacctcatatccgacgtatccaacttaccttgactacactaatcaccttactgcctatggaacaaactttgaacctcagcgttttccgacggaatatcacccgtcgcaatcggctgctcaatggaaccagtataatccaacactgtcgtatgtgggcatttcatcatcaccaacagttcctttctattctacgtccccagcaacggtctcatcaatttcagcctcttcgtcctcctcgccacaaacgttctcatcatcttctgtatctcctgcttcttctccttatttctcatcaccatcctcacaaaaagtgtctgaccatgcgaaaccaactgttgtgaaaaccaaaaatggttatatt…	mypycsayspisvtsyptyptyldytnhltaygtnfepqrfpteyhpsqsaaqwnqynptlsyvgisssptvpfystspatvssisassssspqtfssssvspasspyfsspssqkvsdhakptvvktkngyicfhcnatescrwrdikkdvkcnacfiyerkyktsrpigairtfterksskkrdspy	189
sulstoni	END-1		CSP32.scaffold00253	complement(86086..86242,86289..86389,86433..86623,86664..86874)	CSP32.g6830.t1/exact	atgttctcgccgttcccttcttccccaacgccttctggaatcccgatgacttccgaatcgtcgacgactcaagatcagaacgcggctccgctgttctacgactacgtggataagcacggagtggtgcatcggcacgagatgcgattcgcggcgaatcacggaaggcccgacccgacggactcgttccaagaggatttcggacagtactttgttccttcgttcgcctacccgtcccagcagttcgcgacgccgcccgcttcgcactcgatgttcggaagcatggatccgtcgatcggctactcgccctacccgatgcccgcctaccacacctcgccgtctccgctgccagcgcagccgtcgaaggaatccaagaagagcggctcgcgaaagacgcccatg…	mfspfpssptpsgipmtsessttqdqnaaplfydyvdkhgvvhrhemrfaanhgrpdptdsfqedfgqyfvpsfaypsqqfatppashsmfgsmdpsigyspypmpayhtspsplpaqpskeskksgsrktpmkpsqfhsnsvcsnpncqtrettlwrrtesgevecnacclyfrknrvqrpadlctkkimrrnrrprvetrpvapiapvvvllddetti	220
sulstoni	END-3.1		CSP32.scaffold00253	complement(138598..138706,138761..138998,139044..139130,139180..139414)	CSP32.g6860.t1/exact	atggactcgttctcttcctcgtcgtcttcttcgttcggagccgacttccacggtcagatgcctccatattcacctcatcaagtctacggaacgccttctccgaaccagaacccgatggtcgagatgaggtcggtgtccggattcgaagctaatgagaatcagcagcagtcttaccaccaagacttccagcaagacaaccagcaatatctagtgcctaatcaagattacttttatgacgaacaaggattcgtggtgcagaacgagttccctcttcagcaaaacgtgcagaactactacgagccaaacaatggaccgttcttctacaatcagcagtatccgggtcagatggaacagttcgtcgagcagccgagagaggactttgtcgagctgcgagaggag…	mdsfsssssssfgadfhgqmppysphqvygtpspnqnpmvemrsvsgfeanenqqqsyhqdfqqdnqqylvpnqdyfydeqgfvvqnefplqqnvqnyyepnngpffynqqypgqmeqfveqpredfvelreemkennfgpvkgrrraakkqekkastlhvnsfccncgtretkmwrrnergepecnscnlyfrskgvarpqhlwnkpttqrrrrpaaqahqq	223
sulstoni	END-3.2		CSP32.scaffold00253	complement(145408..145516,145571..145808,145854..145940,145990..146221)	CSP32.g6862.t1/exact	atggactcgttctcttcctcgtcgtcttcttcgttcggagccgacttccacggtcagatgcctccttattcacctcatcaagtctacggaacgccttctccgaaccagaatccgatggtcgagatgaggtcggtgtccggattcgaagcgaatgagaatcagcagcagtcttatcaagacttccagcaagacaaccagcagtatctagtgcctaatcaagattacttttatgacgaacaaggattcgtggtgcagaacgagttccctcttcagcaaaacgtgcagaactactacgagccgaacaatggaccgttcttctacaatcagcagtatccgggtcagatggaacagttcgtcgagcagccgagagaggactttgtcgagctgcgagaggagatg…	mdsfsssssssfgadfhgqmppysphqvygtpspnqnpmvemrsvsgfeanenqqqsyqdfqqdnqqylvpnqdyfydeqgfvvqnefplqqnvqnyyepnngpffynqqypgqmeqfveqpredfvelreemkennfgpvkgrrraakkqekkastlhvnsfccncgtretkmwrrnergepecnscnlyfrskgvarpqhlwnkpttqrrrrpaaqahqq	222

## Sheet: protein domains for Fig. 8
MED representative protein domains
species	domain, start,end; etc.		D1	entire protein
japonica	D1,1,191;D2,70,92;D7,126,149;D8,150,179		D2	Poly-S/T
afra	D1,1,192;D2,100,122;D7,136,159;D8,160,186		D7	C4 zinc finger
sulstoni	D1,1,201;D2,84,127;D7,144,167;D8,168,195		D8	basic domain
waitukubuli	D1,1,210;D2,101,131;D7,159,183;D8,184,203
panamensis	D1,1,181;D2,88,116;D7,128,152;D8,153,180
nouraguensis	D1,1,194;D2,61,118;D7,142,165;D8,166,193
becei	D1,1,193;D2,57,116;D7,141,164;D8,165,192
kamaaina	D1,1,154;D2,61,94;D7,97,122;D8,123,150
inopinata	D1,1,191;D2,87,128;D7,134,159;D8,160,186
elegans	D1,1,174;D2,63,106;D7,114,139;D8,140,164
doughertyi	D1,1,162;D2,72,102;D7,106,131;D8,132,159
tropicalis	D1,1,152;D2,50,88;D7,94,119;D8,120,148
brenneri	D1,1,168;D2,66,91;D7,111,136;D8,137,162
remanei	D1,1,191;D2,48,124;D7,135,160;D8,161,185
latens	D1,1,194;D2,46,127;D7,138,163;D8,164,189
nigoni	D1,1,197;D2,66,137;D7,146,171;D8,172,193
briggsae	D1,1,203;D2,67,139;D7,150,175;D8,176,201
sinica	D1,1,191;D2,81,121;D7,134,159;D8,160,188
zanzibari	D1,1,164;D2,48,102;D7,109,134;D8,135,160
tribulationis	D1,1,179;D2,50,111;D7,125,150;D8,151,176
END-1 representative protein domains
species	domain, start,end; etc.		D1	entire protein
japonica	D1,1,225;D2,5,17;D3,19,45;D4,72,86;D5,108,126;D6,144,165;D7,166,192;D8,193,220		D2	PolyS
afra	D1,1,217;D2,3,26;D3,32,57;D4,58,71;D5,88,103;D6,122,145;D7,146,172;D8,173,200		D3	YTY-PSP (END-1-specific domain)
sulstoni	D1,1,220;D2,3,27;D3,33,58;D4,59,71;D5,89,104;D6,121,143;D7,144,170;D8,171,198		D4	MMD..EDFGQYFV (END-1-specific domain)
waitukubuli	D1,1,229;D2,4,23;D3,24,50;D4,66,79;D5,98,114;D6,127,148;D7,149,175;D8,176,203		D5	SMFGSLDM…QYP (END-1-specific domain)
panamensis	D1,1,223;D2,4,25;D3,26,52;D4,71,81;D5,100,113;D6,131,146;D7,147,173;D8,174,201		D6	Endodermal GATA Domain
nouraguensis	D1,1,217;D2,3,18;D3,21,47;D4,66,76;D5,97,109;D6,124,139;D7,140,166;D8,167,194		D7	C4 zinc finger
becei	D1,1,214;D2,3,16;D3,19,45;D4,64,73;D5,95,107;D6,117,137;D7,138,163;D8,164,191		D8	basic domain
kamaaina	D1,1,202;D2,4,17;D3,23,50;D4,65,77;D5,92,107;D6,125,144;D7,145,171;D8,172,199
inopinata	D1,1,222;D2,4,17;D3,20,47;D4,62,75;D5,89,105;D6,118,139;D7,140,166;D8,167,194
elegans	D1,1,221;D2,3,10;D3,15,42;D4,60,71;D5,85,101;D6,116,137;D7,138,164;D8,165,192
doughertyi	D1,1,232;D2,4,22;D3,23,50;D4,67,79;D5,94,113;D6,130,144;D7,145,171;D8,172,199
tropicalis	D1,1,213;D2,4,20;D3,21,44;D4,59,70;D5,81,99;D6,113,130;D7,131,157;D8,158,185
brenneri	D1,1,225;D2,4,21;D3,22,49;D4,65,78;D5,94,112;D6,129,147;D7,148,174;D8,175,202
remanei	D1,1,238;D2,5,23;D3,24,51;D4,66,79;D5,94,113;D6,133,152;D7,153,179;D8,180,207
latens	D1,1,236;D2,5,23;D3,24,51;D4,66,79;D5,94,113;D6,133,152;D7,153,179;D8,180,207
nigoni	D1,1,236;D2,5,17;D3,23,50;D4,65,78;D5,93,110;D6,127,149;D7,150,176;D8,177,204
briggsae	D1,1,237;D2,5,17;D3,23,50;D4,65,79;D5,94,111;D6,128,150;D7,151,177;D8,178,205
END-3 representative protein domains
species	domain, start,end; etc.		D1	entire protein
japonica	D1,1,231;D2,4,16;D6,145,164;D7,165,189;D8,190,215		D2	PolyS
afra	D1,1,228;D2,3,19;D6,150,169;D7,170,194;D8,195,220		D6	Endodermal GATA Domain
sulstoni	D1,1,223;D2,3,11;D6,141,164;D7,165,189;D8,190,215		D7	C4 zinc finger
waitukubuli	D1,1,222;D2,4,26;D6,136,155;D7,156,180;D8,181,207		D8	basic domain
panamensis	D1,1,250;D2,4,32;D6,164,187;D7,188,212;D8,213,239
nouraguensis	D1,1,222;D2,4,20;D6,142,157;D7,158,182;D8,183,208
becei	D1,1,253;D2,4,20;D6,166,184;D7,185,209;D8,210,235
kamaaina	D1,1,212;D2,3,20;D6,131,154;D7,155,179;D8,180,205
inopinata	D1,1,227;D2,3,20;D6,143,163;D7,164,188;D8,189,214
elegans	D1,1,242;D2,3,15;D6,159,178;D7,179,203;D8,204,229
doughertyi	D1,1,276;D2,3,19;D6,178,204;D7,205,229;D8,230,255
tropicalis	D1,1,213;D2,3,14;D6,123,147;D7,148,172;D8,173,198
brenneri	D1,1,289;D2,5,19;D6,190,211;D7,212,236;D8,237,262
remanei	D1,1,258;D2,3,25;D6,168,192;D7,193,217;D8,218,243
latens	D1,1,258;D2,3,25;D6,172,192;D7,193,217;D8,218,243
nigoni	D1,1,260;D2,3,17;D6,161,184;D7,185,209;D8,210,235
briggsae	D1,1,253;D2,3,18;D6,170,193;D7,194,218;D8,219,244
sinica	D1,1,267;D2,3,19;D6,174,197;D7,198,222;D8,223,248
zanzibari	D1,1,260;D2,3,19;D6,173,196;D7,197,221;D8,222,247
tribulationis	D1,1,255;D2,3,21;D6,166,189;D7,190,214;D8,215,240
