# Supplementary material
Source: publisher figshare collection journal article supplement (https://gsajournals.figshare.com/articles/dataset/_/9820622)
Supplement: Supplementary file 2 [file 2]

| Table S2: binding sites in END-1 promoters |               |        |       | SKN-1    | SKN-1core | POP-1    | POP-1helper | PAL-1    | GATA   | MED-1      | MED-1core |
|--------------------------------------------|---------------|--------|-------|----------|-----------|----------|-------------|----------|--------|------------|-----------|
| #                                          | Name          | Length | %AT   | WWTRTCAT | RTCAT     | CTTTGWWC | GCCRVNW     | ATTATGAC | HGATAR | GTATACTYYY | RGTATAC   |
| 1                                          | japonica      | 600bp  | 57.83 | 1        | 3         | 0        | 2           | 1**      | 3      | 1*         | 2**       |
| 2                                          | afra          | 600bp  | 57.00 | 0        | 3         | 0        | 2           | 0        | 4*     | 0          | 0         |
| 3                                          | sulstoni      | 600bp  | 54.17 | 0        | 4         | 0        | 2           | 0        | 4*     | 0          | 0         |
| 4                                          | waitukubuli   | 600bp  | 57.83 | 0        | 2         | 0        | 2           | 0        | 3      | 0          | 3**       |
| 5                                          | panamensis    | 600bp  | 56.00 | 0        | 2         | 0        | 2           | 0        | 2      | 0          | 0         |
| 6                                          | nouraguensis  | 600bp  | 54.33 | 0        | 2         | 0        | 1           | 0        | 2      | 0          | 0         |
| 7                                          | becei         | 600bp  | 54.17 | 1        | 2         | 0        | 3           | 0        | 2      | 0          | 0         |
| 8                                          | kamaaina      | 600bp  | 63.50 | 1        | 4         | 0        | 2           | 0        | 3      | 1*         | 1         |
| 9                                          | inopinata     | 600bp  | 58.67 | 0        | 0         | 0        | 6*          | 0        | 2      | 0          | 0         |
| 10                                         | elegans       | 600bp  | 66.33 | 0        | 1         | 1        | 4*          | 0        | 3      | 2**        | 3**       |
| 11                                         | doughertyi    | 600bp  | 63.17 | 0        | 3         | 0        | 3           | 0        | 4      | 0          | 0         |
| 12                                         | tropicalis    | 600bp  | 63.50 | 0        | 1         | 0        | 0           | 0        | 5      | 0          | 2*        |
| 13                                         | brenneri      | 600bp  | 65.83 | 0        | 2         | 0        | 1           | 0        | 4      | 0          | 0         |
| 14                                         | remanei       | 600bp  | 62.17 | 0        | 2         | 0        | 0           | 0        | 1      | 0          | 0         |
| 15                                         | latens        | 600bp  | 61.83 | 0        | 3         | 0        | 1           | 0        | 2      | 0          | 0         |
| 16                                         | nigoni        | 600bp  | 63.50 | 0        | 2         | 0        | 1           | 0        | 2      | 0          | 4**       |
| 17                                         | briggsae      | 600bp  | 61.67 | 0        | 1         | 0        | 2           | 0        | 1      | 0          | 1         |
| 18                                         | sinica        | 600bp  | 61.50 | 0        | 1         | 0        | 1           | 0        | 6*     | 0          | 0         |
| 19                                         | zanzibari     | 600bp  | 58.50 | 0        | 2         | 0        | 2           | 0        | 1      | 0          | 0         |
| 20                                         | tribulationis | 600bp  | 58.17 | 0        | 1         | 0        | 0           | 0        | 1      | 0          | 0         |

\*  $0.01 \leq p \leq 0.05$

\*\*  $p < 0.01$
