# Supplementary material
Source: publisher figshare collection journal article supplement (https://gsajournals.figshare.com/articles/dataset/_/9820622)
Supplement: Supplementary file 3 [file 2]

Table S3: binding sites in END-3 promoters

| #  | Name          | Length | %AT   | SKN-1    | SKN-1core | POP-1    | POP-1helper | PAL-1    | GATA   | MED-1      | MED-1core |
|----|---------------|--------|-------|----------|-----------|----------|-------------|----------|--------|------------|-----------|
|    |               |        |       | WWTRTCAT | RTCAT     | CTTTGWWC | GCCRVNW     | ATTATGAC | HGATAR | GTATACTYYY | RGTATAC   |
| 1  | japonica      | 600bp  | 63.33 | 0        | 2         | 0        | 2           | 0        | 1      | 2**        | 4**       |
| 2  | afra          | 600bp  | 57.33 | 0        | 2         | 1        | 5           | 0        | 5      | 1*         | 2*        |
| 3  | sulstoni      | 600bp  | 50.00 | 1        | 4         | 0        | 8*          | 0        | 1      | 2**        | 4**       |
| 4  | waitukubuli   | 600bp  | 55.17 | 2*       | 6*        | 1        | 4           | 0        | 2      | 3**        | 4**       |
| 5  | panamensis    | 600bp  | 49.00 | 0        | 4         | 0        | 4           | 0        | 5      | 1**        | 2**       |
| 6  | nouraguensis  | 600bp  | 57.67 | 0        | 3         | 1        | 1           | 0        | 5*     | 1*         | 2*        |
| 7  | becei         | 600bp  | 59.17 | 0        | 5         | 0        | 1           | 0        | 4      | 1*         | 2*        |
| 8  | kamaaina      | 600bp  | 59.17 | 0        | 3         | 1        | 5           | 0        | 1      | 1**        | 4**       |
| 9  | inopinata     | 600bp  | 63.50 | 1        | 3         | 0        | 3           | 0        | 1      | 0          | 3**       |
| 10 | elegans       | 600bp  | 65.67 | 1        | 3         | 1        | 0           | 0        | 3      | 4**        | 6**       |
| 11 | doughertyi    | 600bp  | 61.67 | 1        | 1         | 0        | 0           | 0        | 2      | 4**        | 8**       |
| 12 | tropicalis    | 600bp  | 57.00 | 0        | 3         | 0        | 4           | 0        | 2      | 4**        | 9**       |
| 13 | brenneri      | 600bp  | 57.17 | 0        | 3         | 0        | 0           | 0        | 3      | 3**        | 6**       |
| 14 | remanei       | 600bp  | 63.33 | 0        | 3         | 0        | 2           | 0        | 1      | 2**        | 6**       |
| 15 | latens        | 600bp  | 65.00 | 0        | 1         | 0        | 1           | 0        | 3      | 2**        | 4**       |
| 16 | nigoni        | 600bp  | 65.00 | 0        | 4         | 0        | 1           | 0        | 4      | 0          | 2*        |
| 17 | briggsae      | 600bp  | 65.33 | 0        | 6         | 0        | 0           | 0        | 2      | 0          | 2*        |
| 18 | sinica        | 600bp  | 61.50 | 0        | 4         | 0        | 3           | 0        | 0      | 3**        | 3**       |
| 19 | zanzibari     | 600bp  | 61.67 | 0        | 5         | 1        | 4           | 0        | 3      | 4**        | 9**       |
| 20 | tribulationis | 600bp  | 59.17 | 1        | 4         | 0        | 3           | 0        | 4      | 4**        | 8**       |

\*  $0.01 \leq p \leq 0.05$ \*\*  $p < 0.01$
